# Supplementary material for: Drug repurposing for Alzheimer’s disease from 2012–2022—a 10-year literature review
Source: Front Pharmacol. 2023 Sep 7;14:1257700. doi: 10.3389/fphar.2023.1257700 (PMC10512468; doi:10.3389/fphar.2023.1257700)
Supplement: Supplementary file 1 [file Table2.xlsx]

## Sheet: Supplementary Table S2
Supplementary Table S2. Data collected during literature review.
PMID	Title	Drug repurposing candidates (hit candidates)	Drug repurposing candidates (lead candidates)	Drug repurposing strategy (in silico, in vitro, in vivo)	Description of cmputational drug repurposing strategy	Candidate validation?	Description of validation	General tool for drug repurposing?	Potential for suggested drug repurposing candidates to treat other diseases?	AD-specific validation?	AD-specific validation data type	Description of AD-specific validation	Publication year	Journal abbreviation	Journal title	Journal impact factor
24177719	The functional therapeutic chemical classification system	malathion, echothiophate, hexafluronium, gallamine, triethiodide, tubocurarine, isoflurophate, edrophonium, ambenonium, pyridostigmine, neostigmine, demecarium, physostigmine, amobarbital, pentobarbital, phenobarbital, thiopental, talbutal, butabarbital, primidone, metharbital, butethal, heptabarbital, aprobarbital, hexobarbital, secobarbital, butalbital, methylphenobarbital, pralidoxime, dipivef…	n/a	in silico	text mining/semantic inference	no	illustrate how new classification system can be used to generate drug repurposing hypotheses using Alzheimers disease as a use-case - suggest drugs for AD repurposing but do not provide validation	yes	no	no	n/a	n/a	2014	Bioinformatics	Bioinformatics	6.931
24564976	Computational drug repositioning through heterogeneous network clustering	avagacestat, begacestat, semagacestat, tarenflurbil	n/a	in silico	network model	no	counted PubMed references for drug repositioning candidates (literature review considered to be replication rather than validation)	yes	no	no	n/a	n/a	2013	BMC Syst Biol	BMC Systems Biology	2.048
24632812	Transcriptomic analysis of the effects of a fish oil enriched diet on murine brains	fish oil	n/a	in vivo	n/a	in vivo (animal model)	fish oil enriched diet reduced the amyloidal burden, attenuated oxidative stress, and assisted in somatostatin activation (the signatures of attenuation of Alzheimer's disease, Parkinson's disease, and affective disorder)	no	yes – potential to treat illnesses typically triggered by the hypoactivities of dopaminergic, adrenergic, cholinergic, and GABAergic networks	no	n/a	n/a	2014	PLoS One	PLoS One	3.752
25141174	Molecular investigations of protriptyline as a multi-target directed ligand in Alzheimer's disease	protriptyline, amytriptyline, maprotiline, doxepin, nortriptyline	protriptyline	in silico	structure-based	in vitro	biophysical assays, isothermal calorimetry, fluorescence quenching experiments, kinetic studies and atomic force microscopy, as well as molecular dynamics simulations used to support top drug candidate suggested by virtual screening molecular investigation of AD [showing protriptyline inhibits multiple targets of AD: acetylcholinesterase (AChE), β-secretase (BACE-1), and amyloid β (Aβ) aggregatio…	no	no	no	n/a	n/a	2014	PLoS One	PLoS One	3.752
25284792	Modeling cerebrovascular pathophysiology in amyloid-β metabolism using neural-crest-derived smooth muscle cells	atorvastatin, simvastatin, rifampicin, minocycline, losartan, atorvastatin + simvastatin, atorvastatin + rifampicin, simvastatin + rifampicin	atorvastatin, rifampicin	in vitro	n/a	in vitro	confirm lipoprotein receptor, LRP1, functions to mediate Aβ uptake and intracellular lysosomal degradation; atorvastatin and rifampicin found to upregulate the gene and protein expressions of lipoprotein receptors, atorvastatin and rifampicin also found to significantly increase Aβ40 and Aβ42 uptake in NCSMCs over vehicle controls	no	no	no	n/a	n/a	2014	Cell Rep	Cell Reports	9.995
25387614	Modulation of the Aβ peptide aggregation pathway by KP1019 limits Aβ-associated neurotoxicity	KP1019	n/a	in vitro	n/a	in vitro	electron paramagnetic resonance (EPR) spectroscopy, native gels and transmission electron microscopy (TEM) analyses, incubation in an in vitro human neuronal cell model	no	no	yes	SH-SY5Y human neuroblastoma cell line	incubation in an in vitro human neuronal cell model demonstrating that the formation of KP1019-Aβ species rescues cell viability from Aβ-associated neurotoxicity	2015	Metallomics	Metallomics	4.636
25566747	Combining two repurposed drugs as a promising approach for Alzheimer's disease therapy	acamprosate + baclofen	n/a	in vitro	n/a	in vivo (animal model)	used a well-known model of intracerebroventricular injection of Aβ25–35 oligomers in mice to mimic both the cognitive impairment and the associated cellular degeneration observed in AD; also used a mouse mutant APP transgenic model	no	no	yes	mouse model of AD	in vivo, the combination of acamprosate + baclofen alleviated cognitive deficits in the acute Aβ25–35 peptide injection model and in the mouse mutant APP transgenic model	2015	Sci Rep	Scientific Reports	4.997
26066505	Checking the STEP-Associated Trafficking and Internalization of Glutamate Receptors for Reduced Cognitive Deficits: A Machine Learning Approach-Based Cheminformatics Study and Its Application for Drug Repurposing	acamprosate, adapalene, adefovir dipivoxil, adenosine monophosphate, adenosine triphosphate, alitretinoin, amiloride, amlexanox, benzthiazide, bexarotene, bicalutamide, brimonidine, bumetanide, calcium gluceptate, candesartan, cefaclor, cefadroxil, cefdinir, cefixime, cefmetazole, cefprozil, ceftazidime, ceftriaxone, cefuroxime, cephalexin, ceruletide, chlordiazepoxide, cimetidine, colistimethate…	adenosine triphosphate, folic acid	in silico	machine learning	molecular docking	109 drugs predicted by classification model, the top compounds predicted to be active by the machine learning based models were screened using molecular docking studies for deeper insights into their binding mechanism	no	no	no	n/a	n/a	2015	PLoS One	PLoS One	3.752
26197808	Bioinformatics methods in drug repurposing for Alzheimer's disease	rottlerin, dapsone, biperiden, skimmianine, bupropion, milrinone, pioglitazone, rucaparib, nifedipine, BRD-K05331696, SN-38, isoliquiritigenin, forskolin, vorinostat, trichostatin-a, HC-toxin, THM-I-94, panobinostat, dacinostat, KM-00927, bisindolylmaleimide, THZ-2-98-01, enzastaurin, PKCbeta-inhibitor, inhibitor BEC, SB-216763, 6-bromoindirubin-3'-oxime	n/a	in silico	gene signature	no	pipeline results in list of 27 drugs; some additional analyses performed on final drug list: structure similarity, pathway/ontology enrichment, network analysis, and literature search for drug-Alzheimer relationship, but mostly replication rather than validation (comparing candidates to existing Alzheimer's drugs)	no	no	no	n/a	n/a	2016	Brief Bioinform	Briefings in Bioinformatics	13.994
26567970	The FDA-approved natural product dihydroergocristine reduces the production of the Alzheimer's disease amyloid-β peptides	dihydroergocristine	n/a	in vitro	n/a	in vitro	experimental screen followed by additional experiments investigating dihydroergocristine; finding that dihydroergocristine inhibits the intracellular production of Aβ and the activity of γ-secretase	no	no	no	n/a	n/a	2015	Sci Rep	Scientific Reports	4.997
26612616	Effects of the nicotinic agonist varenicline on the performance of tasks of cognition in aged and middle-aged rhesus and pigtail monkeys	varenicline	n/a	in vivo	n/a	in vivo (animal model)	effects of varenicline across three different behavioral tasks in monkeys	no	yes – evaluating potential of varenicline as a repurposed drug for disorders of cognition	no	n/a	n/a	2016	Psychopharmacology (Berl)	Psychopharmacology	4.415
26697495	Inhibition of ACE Retards Tau Hyperphosphorylation and Signs of Neuronal Degeneration in Aged Rats Subjected to Chronic Mild Stress	captopril	n/a	in vivo	n/a	in vivo (animal model)	treatment of rats with the brain-penetrating ACE inhibitor, captopril, retarded tau hyperphosphorylation and signs of neurodegeneration; not using an animal model of Alzheimer's disease but rather a model of "chronic unpredictable mild stress"	no	no	no	n/a	n/a	2015	Biomed Res Int	BioMed Research International	3.246
26742522	Clozapine Improves Memory Impairment and Reduces Aβ Level in the Tg-APPswe/PS1dE9 Mouse Model of Alzheimer's Disease	clozapine	n/a	in vivo	n/a	in vivo (animal model)	clozapine intake improved the Aβ-induced memory impairment and suppressed Aβ levels and plaque deposition in the brain of AD mice; clozapine also upregulated Trk, brain-derived neurotrophic factor, cyclin-dependent kinase-5, and p35 in the cortex and hippocampus of AD mice and activated AMP-activated protein kinase	no	no	yes	mouse model of AD	clozapine treatment found to reduce amyloid beta deposition and cognitive impairment in transgenic mice of AD, Tg-APPswe/PS1dE9	2017	Mol Neurobiol	Molecular Neurobiology	5.686
27151405	DrugGenEx-Net: a novel computational platform for systems pharmacology and gene expression-based drug repurposing	AT101, rasagiline, interferons, ABT263, vandetanib, LY544344, collagenase, etidronic acid, celecoxib, DB03959, calcium, CVX-045, arsenic, trioxide, ATP, dovitinib, lenvatinib, antihemophilic factor, quetiapine, somatropin recombinant, ziprasidone, olanzapine, aripiprazole, clozapine, bromocriptine, quercetin, flavopiridol, DB02264, pergolide, alisertib, DB03431, nintedanib, regorafenib, methotrim…	n/a	in silico	network model	no	replication only (top predicted drug indications for AD analyzed using literature review)	yes	no	no	n/a	n/a	2016	BMC Bioinformatics	BMC Bioinformatics	3.307
27392852	High-Throughput Screening for Identification of Blood-Brain Barrier Integrity Enhancers: A Drug Repurposing Opportunity to Rectify Vascular Amyloid Toxicity	etodolac, granisetron, beclomethasone	n/a	in vitro	n/a	in vitro	experimental screening, with further investigation of top compounds – ultimately, only 3 out of the 5 effective drugs in the bEnd3-based BBB model demonstrated a promising effect to protect the hCMEC/D3-based BBB model integrity	no	no	yes	endothelial-cell based model of the BBB	identifying drugs that rectify/protect BBB integrity from vascular amyloid toxicity associated with AD progression	2016	J Alzheimers Dis	Journal of Alzheimer's Disease	4.16
28005991	Drug Repositioning for Alzheimer's Disease Based on Systematic 'omics' Data Mining	gemtuzumab ozogamicin, vadastuximab talirine, lintuzumab, BI-836858, HuM195/rGel, HuM-195-Ac-225, anti-MIF antibody, gallamine triethiodide, pyridostigmine, demecarium, physostigmine, endrophonium, ambenonium, isoflurophate, FG-2216, FG-4592, GSK1278863, BAY 85-3934, ethosuximide, methsuximide, paramethadione, trimethadione, verapamil, mibefradil, alteplase, anistreplase, reteplase, streptokinase…	edrophonium, physostigmine	in silico	text mining/semantic inference	computational (Connectivity Map and C2Maps)	omics data mining identified protein targets that were then linked to approved or clinical trial drugs; Cmap and C2maps analysis validated 2 drugs of interest: edrophonium and physostigmine	no	no	no	n/a	n/a	2016	PLoS One	PLoS One	3.752
28035920	Using Drugs as Molecular Probes: A Computational Chemical Biology Approach in Neurodegenerative Diseases	riluzole, cyclosporine	n/a	in silico	network model	no	find support for predicted drugs in published literature (discussion of possible mechanism of action, considered replication rather than validation)	no	no	no	n/a	n/a	2017	J Alzheimers Dis	Journal of Alzheimer's Disease	4.16
28155639	Inferring new indications for approved drugs via random walk on drug-disease heterogenous networks	biperiden, procyclidine, benzatropine, carbidopa, ropinirole, ramipexole, scopolamine, calcitriol, trihexyphenidyl, bromocriptine	n/a	in silico	network model	no	list top 10 predicted drugs for Alzheimer's disease by TP-NRWRH; found that nine out of ten drugs are muscarinic antagonists or antimuscarinics-like agents that have been approved or investigational for neurodegenerative diseases such as Parkinson's disease (replication rather than validation)	yes	no	no	n/a	n/a	2016	BMC Bioinformatics	BMC Bioinformatics	3.307
28430857	Repurposed drugs targeting eIF2α-P-mediated translational repression prevent neurodegeneration in mice	trazodone hydrochloride, dibenzoylmethane, trifluorperazine, azadirectin, proguanil	trazodone hydrochloride, dibenzoylmethane	in vitro	n/a	in vivo (animal model)	phenotypic screen identified two compounds that were then found to be neuroprotective in two mouse models of neurodegeneration	no	no	yes	mouse model of neurodegeneration	two mouse models of neurodegeneration (prion-diseased and tauopathy FTD mice) – in prion-diseased mice, both trazodone and dibenzoylmethane treatment restored memory deficits, abrogated development of neurological signs, prevented neurodegeneration and significantly prolonged survival; in tauopathy-frontotemporal dementia mice, both drugs were neuroprotective, rescued memory deficits and reduced …	2017	Brain	Brain: A Journal of Neurology	15.255
28503657	An amylin analog used as a challenge test for Alzheimer's disease	pramlintide	n/a	in vivo	n/a	no	drug administered to participants; observd a decrease in total tau in the plasma of AD subjects but not in control participants – suggests potential use for pramlintide in AD drug repurposing but not main point of study (primarily investigating use of pramlintide in diagnosis of AD)	no	no	no	n/a	n/a	2017	Alzheimers Dement (N Y)	Alzheimer's & Dementia: Translational Research & Clinical Interventions	6.307
28542505	AlzhCPI: A knowledge base for predicting chemical-protein interactions towards Alzheimer's disease	shichangpu	n/a	in silico	machine learning	no	analyze the possible mechanisms of action of shichangpu against AD, no validation of shichangpu's effect in treating AD	no	no	no	n/a	n/a	2017	PLoS One	PLoS One	3.752
28755170	Identification and validation of uterine stimulant methylergometrine as a potential inhibitor of caspase-1 activation	methylergometrine, ursolic acid, sulfasalazine	methylergometrine	in vitro	n/a	no	weak link to Alheimer's – de-regulation of inflammasome contributes to the progression of several diseases, such as Alzheimer’s disease; MEM inhibits the activation of the nucleotide-binding oligomerization domain-like receptor protein 1 (NLRP1) and nucleotide-binding oligomerization domain-like receptor protein 3 (NLRP3) inflammasomes in cellular models upon different pro-inflammatory stimuli	no	yes – potential for treatment of inflammatory diseases generally	no	n/a	n/a	2017	Apoptosis	Apoptosis	5.561
29078760	In silico repurposing of antipsychotic drugs for Alzheimer's disease	sulmepride, promazine hydrochloride, bromperidol, anisopirol, melperone, pimozide, benperidol, azabuperone, anisoperidone	benperidol	in silico	n/a	molecular docking	computational experiments - screening using molecular docking; benperidol was found to be the best candidate for the cholinergic (AChE and BuChE), monoaminergic (MAO A), glutamatergic system (NMDA) and beta-secretase cleavage enzyme (BACE 1) molecular investigation of AD [benperidol was found to be the best candidate drug interacting with different target proteins involved in AD (AChE, BuChE, BAC…	no	no	no	n/a	n/a	2017	BMC Neurosci	BMC Neuroscience	3.264
29166618	iPSC-Based Compound Screening and In Vitro Trials Identify a Synergistic Anti-amyloid β Combination for Alzheimer's Disease	bromocriptine, cilostazol, cromolyn, fluvastatin, probucol, topiramate	bromocriptine + cromolyn + topiramate	in vitro	n/a	in vitro	selected 6 leading compounds from Aβ-lowering screen hits, and then tested a synergistic combination of bromocriptine, cromolyn, and topiramate as an anti-Aβ cocktail using neurons from familial and sporadic AD patients	no	no	yes	iPSC-derived cortical neurons from patients with familial and sporadic AD	drug combination decreased toxic Aβ levels in neurons derived from patients with familial and sporadic AD	2017	Cell Rep	Cell Reports	9.995
29348604	Cromolyn Reduces Levels of the Alzheimer's Disease-Associated Amyloid β-Protein by Promoting Microglial Phagocytosis	cromolyn, cromolyn + ibuprofen	n/a	in vivo, in vitro	n/a	in vivo (animal model)	cromolyn, alone, or in combination with ibuprofen, almost completely abolished longer insoluble Aβ species and increased microglial recruitment to, and phagocytosis of, β-amyloid deposits in AD mice; cromolyn also promoted Aβ42 uptake in microglial cell-based assays	no	no	yes	mouse model of AD	using well-characterized transgenic AD mouse model, the APPswe Tg2576	2018	Sci Rep	Scientific Reports	4.997
29743517	Identification of new EphA4 inhibitors by virtual screening of FDA-approved drugs	ergoloid, cyproheptadine, nilotinib, abiraterone, retapamulin	nilotinib	in silico	structure-based	in vitro	start with virtual screen, then perform additional biochemical and cellular assays to identify inhibitors of EphA4 (previously found to be molecular target for AD)	no	no	no	n/a	n/a	2018	Sci Rep	Scientific Reports	4.997
29932108	Proximal Pathway Enrichment Analysis for Targeting Comorbid Diseases via Network Endopharmacology	orlistat, obeticholic acid, chenodeoxycholic acid, esmolol, practolol, clenbuterol, erythrityl tetranitrate, fenoterol, arbutamine, bupranolol, dalfampridine, magnesium sulfate, roflumilast, crisaborole, montelukast	n/a	in silico	network model	no	provide high scoring drug repurposing candidates that can target common mechanisms involved in type 2 diabetes and Alzheimer's disease; no validation of these drugs in AD	no	yes – focused on drugs targeting common mechanisms involved in type 2 diabetes and Alzheimer’s disease	no	n/a	n/a	2018	Pharmaceuticals (Basel)	Pharmaceuticals	5.215
29935546	Alzheimer's disease master regulators analysis: search for potential molecular targets and drug repositioning candidates	cefuroxime, cyproterone, dydrogesterone, metrizamide, trimethadione, vorinostat	n/a	in silico	network model	no	Used the Connectivity Map to identify drug repurposing candidates based on MR candidate regulatory units in network; discussed evidence in literature (only replication not validation)	no	no	no	n/a	n/a	2018	Alzheimers Res Ther	Alzheimer's Research & Therapy	8.831
29990107	Human Pathway-Based Disease Network	prednisone	n/a	in silico	network model	no	network analysis suggests prednisone may treat Alzheimer's disease; no validation	yes	no	no	n/a	n/a	2019	IEEE/ACM Trans Comput Biol Bioinform	IEEE/ACM Transactions on Computational Biology and Bioinformatics	3.702
30007162	Doxycycline counteracts neuroinflammation restoring memory in Alzheimer's disease mouse models	doxycycline	n/a	in vivo	n/a	in vivo (animal model)	APP/PS1dE9 (APP/PS1) AD mice receiving DOXY under different treatment regimens recovered their memory without plaque reduction; this was confirmed in an AβO-induced mouse model, where the AβO-mediated memory impairment was abolished by a DOXY pretreatment	no	no	yes	mouse model of AD	two mouse models of AD used: APP/PS1Tg mice and an acute AβO-induced mouse model of AD – observed memory recovery with doxycycline in both models	2018	Neurobiol Aging	Neurobiology of Aging	5.133
30157623	Interactions of Selective Serotonin Reuptake Inhibitors with β-Amyloid	fluvoxamine, fluoxetine, paroxetine, sertraline, escitalopram	fluoxetine, paroxetine	in vitro	n/a	in vitro	fluoxetine and paroxetine were identified as the most promising SSRIs based on experimental findings (multiple experiments investigating their potential to prevent Aβ42 aggregation) molecular investigation of AD [fluoxtine and paroxetine can directly interact with Aβ42 and prevent its aggregation and fibrillogenesis (confirmed in multiple experiments)]	no	no	no	n/a	n/a	2019	ACS Chem Neurosci	ACS Chemical Neuroscience	5.78
30234434	Application of molecular framework-based data-mining method in the search for beta-secretase 1 inhibitors through drug repurposing	DB06925, verubecestat, enzalutamide	n/a	in silico	text mining/semantic inference	molecular docking	465 compounds extracted from the literature; subsequent molecular docking investigation (BACE-1) molecular investigation of AD [identifying drugs that inhibit the AD target BACE-1 (to inhibit amyloid production)]	no	no	no	n/a	n/a	2019	J Biomol Struct Dyn	Journal of Biomolecular Structure and Dynamics	5.235
30314892	Re-thinking Alzheimer's disease therapeutic targets using gene-based tests	afatinib, brigatinib, cetuximab, erlotinib, gefitinib, lapatinib, necitumumab, neratinib, olmutinib, osimertinib, panitumumab, glatiramer acetate, apolizumab, vandetanib , copper, zinc, zinc acetate, zinc chloride, baricitinib, leflunomide, omalizumab, alacepril, benazepril, benazeprilat, captopril , ceronapril, cilazapril, delapril, deserpidine, enalapril, enalaprilat, fosinopril, fosinoprilat, …	n/a	in silico	gene signature	no	identified genes strongly associated with late-onset Alzheimer's disease with products targeted by existing drugs, did not provide additional evidence for suggested drugs	no	no	no	n/a	n/a	2018	EBioMedicine	eBioMedicine	11.205
30521994	A multifunctional compound ebselen reverses memory impairment, apoptosis and oxidative stress in a mouse model of sporadic Alzheimer's disease	ebselen	n/a	in vivo	n/a	in vivo (animal model)	found drug effective in reversing memory impairment, hippocampal oxidative stress, and apoptosis in a mouse model of sporadic AD	no	no	yes	mouse model of AD	using mouse model of sporadic AD induced by icv injection of STZ (evaluating multiple endpoints)	2019	J Psychiatr Res	Journal of Psychiatric Research	5.25
30551512	The exploration of novel Alzheimer's therapeutic agents from the pool of FDA approved medicines using drug repositioning, enzyme inhibition and kinetic mechanism approaches	fluspirilene, tamulosin, domperidone, risperidone, cinitapride, bosutinib, verapamil, tetrabenazine, sertindole, darifenacin	cinitapride	in silico	structure-based	in vitro	based on docking and pharmacogenomics results, subset of drugs selected for in vitro analysis (evaluation of AChE inhibition); cinitapride identified as best candidate through experimental studies molecular investigation of AD [evaluating possible therapeutic potential of repositioned drugs against AChE using in vitro analysis]	no	no	no	n/a	n/a	2019	Biomed Pharmacother	Biomedicine & Pharmacotherapy	7.419
30710675	Multi-faceted therapeutic strategy for treatment of Alzheimer's disease by concurrent administration of etodolac and α-tocopherol	etodolac, alpha-tocopherol, etodolac + alpha-tocopherol	n/a	in vitro	n/a	in vitro, in vivo (animal model)	in vitro high-throughput screening (HTS) assay to evaluate candidate drugs; promising drugs investigated further (in vitro and in vivo studies)	no	no	yes	experiments in brain endothelial cells + neurons + astrocytes, mouse model of AD	used bEnd3 cell-based BBB model, used transgenic 5XFAD mice (5XFAD is a well-known transgenic mouse model for AD)	2019	Neurobiol Dis	Neurobiology of Disease	7.046
31000720	Felodipine induces autophagy in mouse brains with pharmacokinetics amenable to repurposing	nimodipine, isradipine, felodipine, verapamil, diltiazem, amlodipine, nifedipine, nicardipine, clevidipine, nisoldipine	felodipine	in vitro, in vivo	n/a	in vivo (animal model)	start with experiments in neurons and zebrafish, then move to mouse models (although do not use animal model of AD) – find that felodipine induces autophagy in neurons and enhances removal of a range of disease-causing proteins: mutant huntingtin, mutant α-synuclein, and tau	no	yes – focused on neurodegenerative diseases generally (Alzheimer’s disease, Parkinson’s disease, and Huntington’s disease all manifest with the neuronal accumulation of toxic proteins)	no	n/a	n/a	2019	Nat Commun	Nature Communications	17.694
31019997	Repurposing the KCa3.1 inhibitor senicapoc for Alzheimer's disease	senicapoc	n/a	in vitro, in vivo	n/a	in vivo (animal model)	investigating effect of drug on microglial activation, Aβ deposition and hippocampal long-term potentiation (hLTP) in 5xFAD mice	no	no	yes	mouse model of AD	using 5xFAD mice to study multiple endpoints	2019	Ann Clin Transl Neurol	Annals of Clinical and Translational Neurology	5.43
31060348	miR-132 regulates the expression of synaptic proteins in APP/PS1 transgenic mice through C1q	C1-INH	n/a	in silico	n/a	in vivo (animal model)	find drug target (C1q) by in silico analysis and then perform in vivo studies (transfect APP/PS1 transgenic mice with miR-132 and give them C1q inhibitors, conduct behavior tests to assess memory and cognitive abilities) – find that administration of the C1q inhibitor C1INH exerts therapeutic effect in APP/PS1 mice	no	no	yes	mouse model of AD	evaluating cognitive performance in APP/PS1 transgenic mice	2019	Eur J Histochem	European Journal of Histochemistry	1.966
31116390	deepDR: a network-based deep learning approach to in silico drug repositioning	isoprenaline, aripiprazole, phenobarbital, risperidone, dopamine, phenytoin, carbamazepine, ceftriaxone, nitric oxide, primidone, hyoscyamine, perphenazine, quetiapine, bosentan, lamotrigine, benzylpenicillin, methylphenobarbital, biperiden, cimetidine, ziprasidone	n/a	in silico	network model, machine learning	no	replication only via literature review (identify evidence supporting predictions from clinical/preclinical studies and other literature data)	yes	no	no	n/a	n/a	2019	Bioinformatics	Bioinformatics	6.931
31217489	Shared Molecular Signatures Across Neurodegenerative Diseases and Herpes Virus Infections Highlights Potential Mechanisms for Maladaptive Innate Immune Responses	metrifonate, anisomycin, molindone, pronetalol, dipivefrine, mebeverine, prasterone, pirenzepine, metergoline, pargyline, piribedil, pergolide, hemicholinium, minaprine, alfacalcidol, cholecalciferol, calcipotriene, ergocalciferol, paricalcitol, calcitriol, doxercalciferol, calcifediol, tipiracil, vincristine, docetaxel, paclitaxel, colchicine, vinorelbine, trastuzumab emtansine, brentuximab vedo…	n/a	in silico	gene signature	no	provide list of drugs targeting DEGs associated with viral host response and Alzheimer's Disease or Parkinson's Disease (use EMBL-EBI ChEMBL database and Connectivity Map); no validation	no	yes – looking at both Alzheimer's and Parkinson's (in the context of similarities to herpes viral infections)	no	n/a	n/a	2019	Sci Rep	Scientific Reports	4.997
31335937	Repurposing antihypertensive drugs for the prevention of Alzheimer's disease: a Mendelian randomization study	antihypertensive drugs	none (no effect)	in silico	Mendelian randomization	no	two-sample Mendelian randomization study – suggests that lowering systolic blood pressure via the protein targets of antihypertensive drugs is unlikely to affect the risk of developing Alzheimer’s disease; did not attempt to confirm signal in another dataset or using another method	no	no	no	n/a	n/a	2020	Int J Epidemiol	International Journal of Epidemiology	9.685
31358793	Dual dose-dependent effects of fingolimod in a mouse model of Alzheimer's disease	fingolimod	n/a	in vivo	n/a	in vivo (animal model)	tested multiple doses – at the lowest dose tested (0.03 mg/kg/day), fingolimod improved memory, decreased activation of brain microglia and astrocytes, and restored hippocampal levels of GABA and glycerophosphocholine with no effect on circulating lymphocyte counts	no	no	yes	mouse model of AD	5xFAD mice	2019	Sci Rep	Scientific Reports	4.997
31368868	Inhibitory Mechanism of An Anticancer Drug, Bexarotene Against Amyloid β Peptide Aggregation: Repurposing Via Neuroinformatics Approach	bexarotene	n/a	in silico	structure-based	molecular docking	analysis of bexarotene's interactions with Aβ, RAGE, and BACE-1 molecular investigation of AD [show that bexarotene has the potential to reduce Aβ-peptide aggregation through several different mechanistic pathways]	no	no	no	n/a	n/a	2019	Curr Pharm Des	Current Pharmaceutical Design	3.31
31492831	Drug repurposing for Alzheimer's disease based on transcriptional profiling of human iPSC-derived cortical neurons	xamoterol, trichlormethiazide, thioguanosine, telenzepine, ronidazole, pyrantel, proparacaine, probenecid, phenoxybenzamine, phenindione, phenacetin, oxolinic acid, oxantel, ofloxacin, netilmicin, neostigmine, N6-methyladenosine, monobenzone, mestranol, levamisole, kawain, iproniazid, hydroflumethiazide, glafenine, fluocinonide, fenbufen, etomidate, estriol, ergocalciferol, dropropizine, doxorubi…	n/a	in silico, in vitro	gene signature	no	identified compounds with iPSC profiles showing anti-correlation with at least two representative AD profiles, then identified those with reported neuroprotective activity in the literature (considered to be replication rather than validation)	no	no	no	n/a	n/a	2019	Transl Psychiatry	Translational Psychiatry	7.989
31498121	A Randomized, Double-Blind, Placebo-Controlled Study to Evaluate the Efficacy of Teprenone in Patients with Alzheimer's Disease	teprenone	n/a	in vivo	n/a	in vivo (clinical trial)	in the clinical trial, MMSE scores significantly improved in the teprenone group; teprenone may be effective for AD when administered before atrophy progression in the medial temporal areas	no	no	yes	clinical trial	patients with mild to moderate AD, with a Mini-Mental State Examination (MMSE) score of 13 to 26, were randomly allocated into two groups depending on the administered drug: donepezil + placebo (placebo group) and donepezil + teprenone (teprenone group)	2019	J Alzheimers Dis	Journal of Alzheimer's Disease	4.16
31534955	Predicting Drug-Disease Associations via Using Gaussian Interaction Profile and Kernel-Based Autoencoder	dopamine, methylergonovine, meperidine, gemcitabine, betamethasone, pioglitazone, guanethidine, valrubicin, teriparatide, rizatriptan, ranitidine, nizatidine, nifedipine, lithium, esomeprazole, ergocalciferol, dihydrocodeine, amitriptyline, almotriptan, adenosine	n/a	in silico	machine learning	no	20 drugs predicted by GIPAE to be associated with Alzheimer disease based on Fdatabase; validated in literature (CTD database) – replication rather than validation	yes	no	no	n/a	n/a	2019	Biomed Res Int	BioMed Research International	3.246
31543038	Reappraisal of FDA approved drugs against Alzheimer's disease based on differential gene expression and protein interaction network analysis: an in silico approach	tiludronic acid, olsalazine	n/a	in silico	network model	molecular docking/dynamics	network analysis to identify AD drug targets, drugs ranked based on molecular docking and MM-GBSA energy calculations; drugs possessing best docking score and maximum binding energy were further evaluated through molecular dynamics simulation studies	no	no	no	n/a	n/a	2020	J Biomol Struct Dyn	Journal of Biomolecular Structure and Dynamics	5.235
31634797	Unlocking the concealed targets using system biology mapping for Alzheimer's disease	linezolid, delpazolid, contezolid, pomaglumetad methionil, xylometazoline hydrochloride, sarpogrelate hydrochloride, lenvatinib mesylate, dovitinib lactate, nintedanib, afatinib, tafetinib	n/a	in silico	text mining/semantic inference	no	collated information pertaining to biological targets of AD as well as targets of approved drugs from scientific literature and patents, used this information to suggest potential candidates for repurposing to AD – no validation	no	no	no	n/a	n/a	2019	Pharmacol Rep	Pharmacological Reports	3.919
31683487	Granisetron Alleviates Alzheimer's Disease Pathology in TgSwDI Mice Through Calmodulin-Dependent Protein Kinase II/cAMP-Response Element Binding Protein Pathway	granisetron	n/a	in vitro, in vivo	n/a	in vivo (animal model)	evaluated drug in multiple mouse models: granisetron was tested in C57Bl/6J young and aged wild-type mice, and in a transgenic mouse model of Alzheimer’s disease namely TgSwDI for its effect on BBB intactness and Aβ-related pathology – granisetron enhanced BBB integrity in both aged and TgSwDI mice	no	no	yes	mouse model of AD	using TgSwDI transgenic mice (a CAA/AD mouse model)	2019	J Alzheimers Dis	Journal of Alzheimer's Disease	4.16
31714636	Lipid lowering and Alzheimer disease risk: A mendelian randomization study	statins, ezetimibe, mipomersen	none (no effect)	in silico	Mendelian randomization	no	Mendelian randomization study – did not identify genetic support for the repurposing of statins, ezetimibe, or mipomersen for AD prevention; no validation of signal	no	no	no	n/a	n/a	2020	Ann Neurol	Annals of Neurology	11.274
31714636	Lipid lowering and Alzheimer disease risk: A mendelian randomization study	evolocumab, alirocumab	none (increased risk)	in silico	Mendelian randomization	no	Mendelian randomization study – suggest that pharmacovigilance for neurocognitive effects and the scope for increased AD burden in users of PCSK9 inhibitors may be warranted; no validation of signal	no	no	no	n/a	n/a	2020	Ann Neurol	Annals of Neurology	11.274
31775359	A Prospective Repurposing of Dantrolene as a Multitarget Agent for Alzheimer's Disease	dantrolene	n/a	in vitro	n/a	in vitro	assess biological activities of dantrolene in multiple experiments – ex. show its activity as an AChE inhibitor and ability to hamper the aggregation of Aβ40 and PHF6 (two probes of amyloid aggregation in AD brain) molecular investigation of AD [investigate activities of dantrolene such as the inhibition of monoamine oxidase B and acetylcholinesterase, cytoprotection from oxidative insult, and ac…	no	no	no	n/a	n/a	2019	Molecules	Molecules	4.927
31792364	Blood biomarkers for memory: toward early detection of risk for Alzheimer disease, pharmacogenomics, and repurposed drugs	verteporfin, pioglitazone, salsolidine, sulfadimidine, SB-203580, ronidazole, mesalazine, dioxybenzone, metamizole, 8-azaguanine, levonorgestrel, aminohippuric acid, meglumine, mesalazine, lymecycline, torasemide, dioxybenzone, ginkgolide A, rimexolone, ketanserin, BRD-K03371390, NCGC00185923-01, benzanthrone, SQ 22536, icariin, YM 90709, quipazine maleate, cisapride, leucine enkephalin, BRD-K153…	n/a	in silico	gene signature	no	used 2 independent cohorts of psychiatric disorders patients (one for discovery of candidate biomarkers and one for validation/testing of top biomarkers) – however, these patient cohorts were not directly used to suggest drug candidates; rather, the Connectivity Map and the NIH LINCS L1000 database were used to identify drugs/natural compounds matching the gene expression profiles of panels of th…	no	no	no	n/a	n/a	2020	Mol Psychiatry	Molecular Psychiatry	13.437
32059848	Identifying inducers of BDNF gene expression from pharmacologically validated compounds; antipyretic drug dipyrone increases BDNF mRNA in neurons	carbachol, methacholine, apomorphine, fenoterol, dobutamine, methylergometrine, gabazine, metaproterenol, picrotoxinin, thiocolchicoside, aconitine, dipyrone, isoproterenol, digoxigenin, ractopamine, resibufogenin, vinorelbine, formoterol	dipyrone	in vitro	n/a	in vitro	BDNF levels are reduced in postmortem Alzheimer's disease brains - identified BDNF inducers from a pharmacologically validated compound library; further exprimental investigation of dypirone (dipyrone found to increase Bdnf expression in neurons)	no	yes – focused on neurological diseases that have low levels of BDNF in the brain (ex. depression, Alzheimer's, etc...)	no	n/a	n/a	2020	Biochem Biophys Res Commun	Biochemical and Biophysical Research Communications	3.322
32063857	A Proteotranscriptomic-Based Computational Drug-Repositioning Method for Alzheimer's Disease	quinidine, tocainide, milrinone, indomethacin, suloctidil, etilefrine, mexiletine, bupivacaine, selegiline, topiramate, iproniazid, sulfaguanidine, streptomycin, orlistat, riboflavin, cloperastine, antazoline, ipratropium bromide, mefloquine, dienestrol, latamoxef, piperacillin, vinblastine, paclitaxel, sulindac, flufenamic acid, torasemide, prestwick-857, triflusal, cortisone, fludrocortisone, d…	n/a	in silico	gene signature	no	predicted 31 potential anti-AD drug candidates that commonly belonged to high DRPCs of transcriptomic and proteomic signatures; discussed potential anti-AD MOA of suggested ATC group N drugs using STRING database – no validation of suggested drug candidates	no	no	no	n/a	n/a	2020	Front Pharmacol	Frontiers in Pharmacology	5.988
32438758	Robust Sampling of Defective Pathways in Alzheimer's Disease. Implications in Drug Repositioning	cephaeline, tanespimycin, wortmannin, biperiden, trichostatin A, LY-294002, saquinavir, saquinavir, valproic acid	n/a	in silico	gene signature	no	drug repositioning using Dr. Insight package, no validation	no	no	no	n/a	n/a	2020	Int J Mol Sci	International Journal of Molecular Sciences	6.208
32516365	Screening novel drug candidates for Alzheimer's disease by an integrated network and transcriptome analysis	cilomilast, exemestane, imatinib, loxapine, nimodipine, phenoxybenzamine, staurosporine, tamoxifen, tubocurarine, hexachlorophene, norepinephrine, xaliproden, formoterol, metoclopramide, mocetinostat, rescinnamine, glucosamine, tolcapone, alprenolol, raloxifene, fluphenazine, nadolol, nefazodone, dextromethorphan	n/a	in silico	network model, gene signature	no	identified 24 potential drug candidates for AD treatment using Inverted Gene Set Enrichment analysis, but did not provide additional evidence supporting these drug candidates	no	no	no	n/a	n/a	2020	Bioinformatics	Bioinformatics	6.931
32589834	Targeting Pathological Tau by Small Molecule Inhibition of the Poly(A):MSUT2 RNA-Protein Interaction	duloxetine, saquinavir, clofazimine	n/a	in vitro	n/a	no	screen identifies 3 drugs that target MSUT2 (which is said to decrease pathological tau), but no evidence showing drug treatment actually decreases pathologic tau	no	no	no	n/a	n/a	2020	ACS Chem Neurosci	ACS Chemical Neuroscience	5.78
32619176	Screening of Antibiotics Against β-amyloid as Anti-amyloidogenic Agents: A Drug Repurposing Approach	paromomycin, neomycin	paromomycin	in silico	n/a	in vitro	paromomycin and neomycin were identified with a higher order of estimated free energy of binding in in silico experiments; in in vitro screening, paromomycin significantly reduced the fluorescence intensity and resistance to tryptic degradation of Aβ(1-42) peptides while neomycin had no or little effect when compared to control	no	no	no	n/a	n/a	2021	Curr Comput Aided Drug Des	Current Computer-Aided Drug Design	1.639
32750869	GuiltyTargets: Prioritization of Novel Therapeutic Targets With Network Representation Learning	tolcapone	n/a	in silico	network model, machine learning	no	replication via literature review only, no validation ("An application of GuiltyTargets to Alzheimer's disease resulted in a number of highly ranked candidates that are currently discussed as targets in the literature")	yes	no	no	n/a	n/a	2022	IEEE/ACM Trans Comput Biol Bioinform	IEEE/ACM Transactions on Computational Biology and Bioinformatics	3.702
32807237	Repurposed agents in the Alzheimer's disease drug development pipeline	cromolyn, cromolyn + ibuprofen, amlodipine, atorvastatin, dextromethorphan + bupropion, escitalopram, guanfacine, icosapent ethyl, levetiracetam, losartan, masitinib, metformin, methylphenidate, mirtazapine, zolpidem, zopiclone, benfotiamine, candesartan, cilostazol, dapagliflozin, daratumumab, dasatinib + quercetin, deferiprone, dronabinol, insulin glulisine, lenolidomide, liraglutide, lithium, …	n/a	in silico	text mining/semantic inference	no	assessed repurposed AD therapies represented in Phase I, Phase II, and Phase III of the current AD pipeline as registered on ClinicalTrials.gov as of February 27, 2020	no	no	no	n/a	n/a	2020	Alzheimers Res Ther	Alzheimer's Research & Therapy	8.831
32886489	Gabapentin Inhibits Multiple Steps in the Amyloid Beta Toxicity Cascade	gabapentin	n/a	in silico	structure-based	in vitro	molecular screen followed by in vitro experiments; show that GBP can interfere with Aβ-induced toxicity by blocking multiple steps, resulting in neuroprotection	no	no	yes	hippocampal neurons	GBP was able to block the synaptotoxicity induced by Aβ in hippocampal neurons	2020	ACS Chem Neurosci	ACS Chemical Neuroscience	5.78
33170091	Drug repurposing for Alzheimer's disease: in silico and in vitro investigation of FDA-approved drugs as acetylcholinesterase inhibitors	thiazolidinedione , aminoquinoline, rosiglitazone, hydroxychloroquine, miconazole, oxiconazole	n/a	in silico, in vitro	structure-based	no	complementary computational and enzyme inhibition studies (both types of study used to suggest drugs that inhibit AChE), in vitro findings not used to confirm computational findings or vice versa (no validation)	no	no	no	n/a	n/a	2022	J Biomol Struct Dyn	Journal of Biomolecular Structure and Dynamics	5.235
33255764	Anti-Inflammatory Treatment with FTY720 Starting after Onset of Symptoms Reverses Synaptic Deficits in an AD Mouse Model	fingolimod	n/a	in vivo	n/a	in vivo (animal model)	investigating whether fingolimod rescues AD-related synaptic deficits and memory dysfunction in an amyloid precursor protein/presenilin-1 (APP/PS1) AD mouse model – evaluating multiple endpoints	no	no	yes	mouse model of AD	using amyloid precursor protein/presenilin-1 (APP/PS1) AD mouse model	2020	Int J Mol Sci	International Journal of Molecular Sciences	6.208
33274491	Disproportionality analysis in VigiBase as a drug repositioning method for the discovery of potentially useful drugs in Alzheimer's disease	clozapine, aripiprazole, sertraline, S-duloxetine, tacrine, bupropion, carbidopa, citalopram, clonazepam, escitalopram, fluoxetine, fluvoxamine, mirtazapine, olanzapine, paroxetine, sertraline, topiramate, valproic acid, venlafaxine	clozapine, aripiprazole, sertraline, S-duloxetine	in silico	text mining/semantic inference	in vitro	Identified 22 drugs with safety profiles similar to AD medicines, then examined BuChE inhibitory activity	no	no	no	n/a	n/a	2021	Br J Clin Pharmacol	British Journal of Clinical Pharmacology	3.716
33304987	Targeting abnormal metabolism in Alzheimer's disease: The Drug Repurposing for Effective Alzheimer's Medicines (DREAM) study	efavirenz, deferiprone, deferoxamine, tofacitinib, tocilizumab, TNF inhibitors, dipyridamole, anastrozole, PDE-5 inhibitors, valproic acid, dihydropyridine calcium channel blockers, amiloride, salbutamol, probenecid, montelukast, pentoxifylline	n/a	in silico	text mining/semantic inference	in vivo (patient data – future)	using the ~250 genetic regulators within the 20 dysregulated pathways in the ADAM network, identified 35 FDA approved drugs as potential repurposing candidates (have not yet validated them)	no	no	yes – future	patient data – future	plans to leverage two large population‐based data sources for pharmacoepidemiologic analyses (insurance claims data from the Medicare program and the Clinical Practice Research Datalink (CPRD) GOLD)	2020	Alzheimers Dement (N Y)	Alzheimer's & Dementia: Translational Research & Clinical Interventions	6.307
33337360	Tetrahydrobiopterin Improves Recognition Memory in the Triple-Transgenic Mouse Model of Alzheimer's Disease, Without Altering Amyloid-β and Tau Pathologies	tetrahydrobiopterin	n/a	in vivo	n/a	in vivo (animal model)	mouse model, measuring various cognitive and metabolic deficits	no	no	yes	mouse model of AD	using the triple-transgenic mouse model of AD (3xTg-AD), a model of age-related tau and amyloid-β (Aβ) neuropathologies associated with behavior impairment	2021	J Alzheimers Dis	Journal of Alzheimer's Disease	4.16
33377311	Repurposing FDA-Approved Compounds for the Discovery of Glutaminyl Cyclase Inhibitors as Drugs Against Alzheimer's Disease	detomidine HCl, belinostat (PXD101), amlexanox, acipimox, pilocarpine HCl	n/a	in vitro	n/a	in vitro	given the crucial role of up‐regulated glutaminyl cyclase (QC) in the initiation of AD, the QC inhibitory potency of a library consisting of 1621 FDA-approved compounds was assessed; the Ki of the top 5 compounds with the highest QC inhibitory activities were measured	no	no	no	n/a	n/a	2021	ChemistryOpen	ChemistryOpen	2.63
33400519	The Antiviral Drug Tilorone Is a Potent and Selective Inhibitor of Acetylcholinesterase	tilorone	n/a	in silico	text mining/semantic inference, machine learning	in vitro, molecular docking	employed a machine learning approach with literature data to predict AChE inhibitors; followed by human AChE in vitro assays and molecular docking studies, which identified tilorone as the most promising candidate	no	no	no	n/a	n/a	2021	Chem Res Toxicol	Chemical Research in Toxicology	3.973
33567615	Repurposing of Omarigliptin as a Neuroprotective Agent Based on Docking with A(2A) Adenosine and AChE Receptors, Brain GLP-1 Response and Its Brain/Plasma Concentration Ratio after 28 Days Multiple Doses in Rats Using LC-MS/MS	omarigliptin	n/a	in silico	structure-based	no	no validation – authors mainly show that omarigliptin fits inside the AChE receptor binding site smoothly (mostly discuss omarigliptin in relation to Parkinson's disease rather than Alzheimer's)	no	yes – mention both Alzheimer's and Parkinson's disease	no	n/a	n/a	2021	Molecules	Molecules	4.927
33589615	Machine learning identifies candidates for drug repurposing in Alzheimer's disease	ruxolitinib, vorinostat, regorafenib, tofacitinib, nilotinib, lapatinib, palbociclib, ruxolitinib, cabozantinib, baricitinib, nintedanib, tofacitinib, gefitinib, resveratrol, dasatinib	n/a	in silico, in vitro	machine learning	no	produce a ranked list of possible repurposing candidates - do not further validate these candidates for use in AD	no	no	no	n/a	n/a	2021	Nat Commun	Nature Communications	17.694
33614888	Rasagiline effects on glucose metabolism, cognition, and tau in Alzheimer's dementia	rasagiline	n/a	in vivo	n/a	in vivo (clinical trial)	double-blind, parallel group, placebo-controlled, community-based, three-site trial of 50 participants randomized 1:1 to receive oral rasagiline or placebo	no	no	yes	clinical trial	illustrate the potential benefits of rasagiline on clinical and neuroimaging measures in patients with mild to moderate AD	2021	Alzheimers Dement (N Y)	Alzheimer's & Dementia: Translational Research & Clinical Interventions	6.307
33615172	Sulfonylurea Class of Antidiabetic Drugs Inhibit Acetylcholinesterase Activity: Unexplored Auxiliary Pharmacological Benefit toward Alzheimer's Disease	tolbutamide, chlorpropamide, glyburide	n/a	in vitro	n/a	molecular docking/dynamics	all three drugs found to cause significant inhibition of AChE activity in vitro; further evaluation using molecular docking/dynamics simulations	no	no	no	n/a	n/a	2021	ACS Pharmacol Transl Sci	ACS Pharmacology & Translational Science	4.883
33627474	Multimodal single-cell/nucleus RNA sequencing data analysis uncovers molecular networks between disease-associated microglia and astrocytes with implications for drug repurposing in Alzheimer's disease	fluticasone, mometasone, salbutamol, tretinoin	fluticasone, mometasone	in silico	network model, gene signature	in vivo (patient data)	prioritized repurposed drugs for potential treatment of AD by identifying those that specifically reverse the dysregulated gene expression of microglia and astrocytes, then validated top drug candidates using large-scale, longitudinal patient data	no	no	yes	patient data	usage of fluticasone is significantly associated with a reduced incidence of AD (hazard ratio [HR] = 0.86, 95% confidence interval [CI] 0.83–0.89); usage of mometasone is significantly associated with a decreased risk of AD (HR = 0.74, 95% CI 0.68–0.81) compared to fluticasone after adjusting age, gender, and disease comorbidities	2021	Genome Res	Genome Research	9.438
33632781	Identification of Celecoxib-Targeted Proteins Using Label-Free Thermal Proteome Profiling on Rat Hippocampus	celecoxib	n/a	in vitro, in silico	text mining/semantic inference	no	investigated protein targets of celecoxib; neurodegenerative diseases, such as Alzheimer disease and epilepsy, are also highly enriched in these proteins - no direct validation of celecoxib for use in AD	no	yes – neurodegenerative disease and cancer	no	n/a	n/a	2021	Mol Pharmacol	Molecular Pharmacology	4.058
33659028	Repositioning Drugs to the Mitochondrial Fusion Protein 2 by Three-Tunnel Deep Neural Network for Alzheimer's Disease	imatinib, lamotrigine, sulfametopyrazine, adinazolam, pyrimethamine, bosentan, voriconazole, fluphenazine, pemetrexed, nabumetone, carbamazepine	n/a	in silico	machine learning	molecular docking	drugs recommeded by the three-tunnel deep neural network (3-Tunnel DNN) model; 6 drugs have supported references in literature (replication not validation); molecular docking also performed (showing predicted drug molecules could dock with Mfn2 successfully) – ultimately weak link between AD and Mfn2, however	no	no	no	n/a	n/a	2021	Front Genet	Frontiers in Genetics	4.772
33704677	Verapamil Prevents Development of Cognitive Impairment in an Aged Mouse Model of Sporadic Alzheimer's Disease	verapamil	n/a	in vivo	n/a	in vivo (animal model)	mouse model, multiple measurements of cognitive function	no	no	yes	mouse model of AD	verapamil was studied at a low dose (1mg/kg/d) in a mouse model of sporadic Alzheimer’s disease (sAD) [ICV/STZ induced cognitive impairment] – cognitive function was assessed using established tests for spatial learning, short-term/working memory, and long-term/reference memory	2021	Mol Neurobiol	Molecular Neurobiology	5.686
33718584	Systematic identification of risk factors and drug repurposing options for Alzheimer's disease	atorvastatin, simvastatin, atenolol, ramipril, lisinopril, salbutamol, ventolin, warfarin, rosuvastatin, metformin, insulin, allopurinol, ibuprofen, latanoprost, salmeterol + fluticasone, levothyroxine, bendroflumethiazide, ezetimibe, paracetamol, gliclazide, doxazosin, aspirin, amlodipine	limited evidence to exclude possibility of no association	in silico	Mendelian randomization	no	Mendelian randomization study – for the drug repurposing options analyzed, the authors did not observe evidence supporting their potential effects on reducing AD risk – no attempts to validate these findings	no	no	no	n/a	n/a	2021	Alzheimers Dement (N Y)	Alzheimer's & Dementia: Translational Research & Clinical Interventions	6.307
33722677	Inhibitory mechanism of an antifungal drug, caspofungin against amyloid β peptide aggregation: Repurposing via neuroinformatics and an experimental approach	caspofungin	n/a	in silico	structure-based	in vitro	drug reprofiling and REMD simulations demonstrated that CAS interacts with the β-sheet section, known as Aβ amyloid fibrils hotspot; later, in vitro experiments were acquired in which the fibrillar volume was reduced for CAS-treated Aβ peptide molecular investigation of AD [amyloid beta (Aβ) is considered the central pathological agent of Alzheimer's disease – in vitro assessment of CAS evaluated…	no	no	no	n/a	n/a	2021	Mol Cell Neurosci	Molecular and Cellular Neuroscience	4.626
33727095	Lapatinib ditosylate rescues memory impairment in D-galactose/ovariectomized rats: Potential repositioning of an anti-cancer drug for the treatment of Alzheimer's disease	lapatinib	n/a	in vivo	n/a	in vivo (animal model)	rat model, evaluation of multiple endpoints	no	no	yes	rat model of cognitive decline	cognitive decline induced by ovariectomy (OVX) with chronic administration of D-galactose (D-gal) in female Wistar albino rats [OVX rats were injected with 150 mg/kg/day D-gal ip for 8 weeks to induce AD]	2021	Exp Neurol	Experimental Neurology	5.62
33778168	Inhibition of aggregation of amyloid-β through covalent modification with benzylpenicillin; potential relevance to Alzheimer's disease	benzylpenicillin	n/a	in silico	structure-based	in vitro	mass spectrometry and computational docking experiments followed by in vitro experiments (ex. cell toxicity assay)	no	no	yes	SH-SY5Y human neuroblastoma cell line	BP treatment was found to have a cytoprotective activity against Aβ-induced cell cytotoxicity as shown by the 3-(4,5-dimethylthiazol-2-yl)-2,5-diphenyltetrazolium bromide (MTT) cell toxicity assay	2021	Biochem Biophys Rep	Biochemistry and Biophysics Reports	2.526
33798505	The antibiotic doxycycline mimics the NGF signaling in PC12 cells: A relevant mechanism for neuroprotection	doxycycline	n/a	in vitro	n/a	in vitro	doxycycline induced neurite outgrowth via activation of the trkA receptor and the downstream signaling pathways, PI3K/Akt and MAPK/ERK, without inducing the expression of NGF; doxycycline also increased the expression of GAP-43, synapsin I and NF200, proteins involved in axonal and synaptic plasticity – demonstrating the neurotrophic potential of doxycycline, which might be useful to restore the …	no	yes – neurodegeneration in Alzheimer's disease, Amyotrophic Lateral Sclerosis, and Parkinson's disease	no	n/a	n/a	2021	Chem Biol Interact	Chemico-Biological Interactions	5.168
33828477	Doxycycline Interferes With Tau Aggregation and Reduces Its Neuronal Toxicity	doxycycline	n/a	in vitro	n/a	in vitro	multiple in vitro assays evaluating effect of doxycycline on tau	no	no	yes	SH-SY5Y human neuroblastoma cell line	doxycycline found to counteract the toxicity resulting from heparin-induced tau aggregation	2021	Front Aging Neurosci	Frontiers in Aging Neuroscience	5.702
33941241	Artificial intelligence-based computational framework for drug-target prioritization and inference of novel repositionable drugs for Alzheimer's disease	regorafenib, tamoxifen, ponatinib, dasatinib, imatinib, brigatinib, sorafenib, sunitinib, nintedanib, pazopanib, midostaurin, resveratrol, diethylstilbestrol, tofacitinib, lenvatinib, foreskin fibroblast (neonatal), baricitinib, foreskin keratinocyte (neonatal), bosutinib, estradiol valerate	n/a	in silico	machine learning	no	infer potential repositionable drugs based on the putative targets derived from our computational pipeline; review literature in discussion to identify promising candidates (replication) but no validation	yes	no	no	n/a	n/a	2021	Alzheimers Res Ther	Alzheimer's Research & Therapy	8.831
34020681	Repurposing beta-3 adrenergic receptor agonists for Alzheimer's disease: beneficial effects in a mouse model	beta-3 adrenergic receptor agonists	n/a	in vivo	n/a	in vivo (animal model)	β3AR stimulation reverses memory deficits and shifts downward the insoluble Aβ42/Aβ40 ratio in 16-month-old 3xTg-AD mice	no	no	yes	mouse model of AD	using triple transgenic mouse model of AD (3xTg-AD)	2021	Alzheimers Res Ther	Alzheimer's Research & Therapy	8.831
34030115	Drug repurposing for hyperlipidemia associated disorders: An integrative network biology and machine learning approach	nedocromil, levothyroxine, dextrothyroxine, liothyronine, sucralfate, adenosine, triflusal, L-arginine, L-citrulline	n/a	in silico	machine learning, network model	no	integrate diverse network data and machine learning to predict repurposing of nine drugs for treatment of HL associated diseases - don't provide additional evidence supporting these candidates for AD ("based on our implementation of a combined approach based on biological relevance, network controllability and chemical features, we propose nine drugs that can be repurposed for HL and its associat…	no	yes – hyperlipidemia-associated diseases (cardiovascular disease, cancer, Type II Diabetes, Alzheimer’s disease)	no	n/a	n/a	2021	Comput Biol Chem	Computational Biology and Chemistry	3.737
34035826	A Study to Decipher the Potential Effects of Butylphthalide against Central Nervous System Diseases Based on Network Pharmacology and Molecular Docking Integration Strategy	butylphthalide	n/a	in silico	network model, structure-based	no	built drug-target-disease network of butylphthalide – then used molecular dynamics simulations and literature references to evaluate the binding of butylphthalide with critical targets and the potential of butylphthalide against certain IS-related CNS disease regulation (ex. AD) – no clear validation of butylphthalide for AD repurposing	no	yes – repurposing potential for ischemic stroke-related CNS diseases, including Alzheimer's disease (AD), epilepsy, major depressive disorder (MDD), amyotrophic lateral sclerosis (ALS), and dementia	no	n/a	n/a	2021	Evid Based Complement Alternat Med	Evidence-Based Complementary and Alternative Medicine	2.65
34095679	Therapeutic Targeting of Repurposed Anticancer Drugs in Alzheimer's Disease: Using the Multiomics Approach	vandetanib, erlotinib, gefitinib, afatinib, imatinib, sunitinib, sorafenib, lenvatinib, pazopanib, axitinib	n/a	in silico	text mining/semantic inference	no	omics-based data mining approach to identify the possible relationship of anticancer drugs with AD-associated genes; the resulting drugs were investigated based on computational repurposing tools, similarity scores, physicochemical analysis, literature validation, functional similarity with miRNAs, and pathway analysis but this is not strong validation data (can more so be considered replication …	no	no	no	n/a	n/a	2021	ACS Omega	ACS Omega	4.132
34219594	Potential alternatives to current cholinesterase inhibitors: an in silico drug repurposing approach	brexipirazole, deutetrabenazine, opicapone, istradefylline, ozanimod, siponimod, tafamidis megulmine, safinamide, pimavanserin, leumateperone tosylate, cariprazine	brexipirazole, deutetrabenazine	in silico	text mining/semantic inference	molecular docking/dynamics	start with 11 FDA-approved small molecule drugs for neurological/neurodegenerative conditions; then perform computational experiments (molecular simulation and dynamics studies, etc...) to evaluate potential as butyrylcholinesterase and acetylcholinesterase inhibitors	no	no	no	n/a	n/a	2021	Drug Dev Ind Pharm	Drug Development and Industrial Pharmacy	3.727
34233173	Dimethyl fumarate does not mitigate cognitive decline and β-amyloidosis in female APPPS1 mice	dimethyl fumarate	none (no effect)	in vivo	n/a	in vivo (animal model)	mouse model – treatment with DMF had no influence on water maze performance, β-amyloid accumulation, plaque formation, microglia activation, and recruitment of immune cells to the brain	no	no	yes	mouse model of AD	APPPS1 transgenic model of senile β-amyloidosis	2021	Brain Res	Brain Research	3.61
34276354	Computational Drug Repurposing for Alzheimer's Disease Using Risk Genes From GWAS and Single-Cell RNA Sequencing Studies	ellipticine, alsterpaullone, tomelukast, ginkgolide A, chrysin, ouabain, sulindac sulfide, lorglumide	n/a	in silico	gene signature	no	drug list analysis to select top drug candidates, replication only (literature review to determine the most promising candidates based on preclinical evidence and toxicity profiles)	no	no	no	n/a	n/a	2021	Front Pharmacol	Frontiers in Pharmacology	5.988
34328103	Effects of Naodesheng tablets on amyloid beta-induced dysfunction: A traditional Chinese herbal formula with novel therapeutic potential in Alzheimer's disease revealed by systems pharmacology	naodesheng	n/a	in silico	network model	in vivo (animal model)	proved the therapeutic effect of NDS on cognitive dysfunction in rats with intracerebroventricular injection of Aβ	no	no	yes	rat model of AD	NDS decreased Aβ level in AD model rats (i.c.v. injection model of Aβ)	2021	Biomed Pharmacother	Biomedicine & Pharmacotherapy	7.419
34378011	Drug repositioning based on the heterogeneous information fusion graph convolutional network	benzatropine	n/a	in silico	network model, machine learning	molecular docking	conducted molecular docking experiments on DRHGCN-predicted candidate drugs	yes	no	no	n/a	n/a	2021	Brief Bioinform	Briefings in Bioinformatics	13.994
34439596	Unsupervised Machine Learning to Identify Separable Clinical Alzheimer's Disease Sub-Populations	vitamin D	n/a	in silico	machine learning	no	identify AD clinical sub-populations using unsupervised machine learning, examine medications associated with clusters via association rule mining, do not provide further evidence supporting use of these drugs	no	no	no	n/a	n/a	2021	Brain Sci	Brain Sciences	3.333
34445767	Suppression of LPS-Induced Inflammation and Cell Migration by Azelastine through Inhibition of JNK/NF-κB Pathway in BV2 Microglial Cells	azelastine	n/a	in silico	structure-based	in vitro	performed structure-based virtual screening and identified azelastine (Aze) as one of the candidates; investigated the effects of Aze on lipopolysaccharide (LPS)-induced JNK phosphorylation, pro-inflammatory mediators, and cell migration in BV2 microglial cells	no	yes – targeting neuroinflammation in various neurodegenerative disorders, including Alzheimer's and Parkinson's diseases	no	n/a	n/a	2021	Int J Mol Sci	International Journal of Molecular Sciences	6.208
34482237	Drug repurposing: small molecules against Cu(II)-amyloid-β and free radicals	isoniazid, iproniazid, benmoxin	n/a	in vitro	n/a	in vitro	multiple experiments – ex. investigating the impact of the drugs on the aggregation of Aβ40 and Aβ42 in the absence and presence of metal ions (not clearly linked to AD pathogenesis, however)	no	no	no	n/a	n/a	2021	J Inorg Biochem	Journal of Inorganic Biochemistry	4.336
34515019	Investigating Neuroprotective Potential of Berberine, Levetiracetam and Their Combination in The Management of Alzheimer's Disease Utilizing Drug Repurposing Strategy	berberine, levetiracetam, berberine + levetiracetam	n/a	in vivo	n/a	in vivo (animal model)	evaluated several behavioural, biochemical, enzymatic and antioxidant parameters	no	no	yes	mouse model of neurotoxicity	model of lead acetate-induced neurotoxicity in Swiss albino mice	2021	Curr Rev Clin Exp Pharmacol	Current Reviews in Clinical and Experimental Pharmacology	2.364
34532569	Integrative Network-Based Analysis Reveals Gene Networks and Novel Drug Repositioning Candidates for Alzheimer Disease	methylergometrine, L-689560, ziprasidone, thiothixene, fluphenazine, dextromethorphan, YM-298198, N20C, ifenprodil, flupirtine, felbamate, SCH-23390, clozapine, droperidol, GR-103691, SIB-1893, NBQX, iloperidone, triflupromazine	n/a	in silico	gene signature	no	identify top-ranked glutamate and dopamine receptor antagonists for repositioning in AD, don't explicitly validate these candidates with additional data	no	no	no	n/a	n/a	2021	Neurol Genet	Neurology Genetics	3.663
34534764	Reversing pathology in a preclinical model of Alzheimer's disease by hacking cerebrovascular neoangiogenesis with advanced cancer therapeutics	axitinib	n/a	in vivo	n/a	in vivo (animal model)	battery of tests to assess cognition and memory in aged Tg2576 AD mice and used molecular analysis to demonstrate reduction of amyloid plaques, BBB leakage, hypervascularity and associated disease pathology	no	no	yes	mouse model of AD	Tg2576 transgenic mouse model (commonly employed preclinical AD model)	2021	EBioMedicine	eBioMedicine	11.205
34555615	Targeting transthyretin in Alzheimer's disease: Drug discovery of small-molecule chaperones as disease-modifying drug candidates for Alzheimer's disease	sulindac, olsalazine, flufenamic acid	n/a	in silico	structure-based	in vitro	combined virtual and experimental screening approach to identify compounds that strongly stabilize TTR; report three marketed drugs as SMCs of the TTR/Aβ interaction	no	no	no	n/a	n/a	2021	Eur J Med Chem	European Journal of Medicinal Chemistry	1.966
34610141	The potential anti-amyloidogenic candidate, SPA1413, for Alzheimer's disease	phenoxodiol	n/a	in vitro	n/a	in vitro, in vivo (animal model)	top candidate evaluated in cells and mouse model of Alzheimer's disease	no	no	yes	mouse model of AD	5xFAD (B6SJL) transgenic mouse model of Alzheimer's disease	2022	Br J Pharmacol	British Journal of Pharmacology	3.716
34658774	Neuroprotective Effects of Ceftriaxone Involve the Reduction of Aβ Burden and Neuroinflammatory Response in a Mouse Model of Alzheimer's Disease	ceftriaxone	n/a	in vivo	n/a	in vivo (animal model)	mouse model – multiple endpoints evaluated (ex."CEF exhibited beneficial effects on some cognitive features impaired by Aβ neurotoxicity including complete restoration of the fear-induced memory and learning in the passive avoidance test")	no	no	yes	mouse model of AD	mice injected bilaterally i.c.v. with Aβ fragment 25–35 to produce the AD model	2021	Front Neurosci	Frontiers in Neuroscience	5.152
34692825	Drug Repurposing for Alzheimer's Disease Based on Protein-Protein Interaction Network	tamoxifen, verapamil, alteplase, raloxifene, hexachlorophene, nicotine, clozapine, estradiol, progesterone, pilocarpine, doxorubicin, haloperidol, daunomycin, gentian violet	n/a	in silico	network model	no	ranked drugs based on network degree, then reviewed these drugs in previous experimental and medical studies to identify AD-related drugs (replication rather than validation)	no	no	no	n/a	n/a	2021	Biomed Res Int	BioMed Research International	3.246
34699252	Activation of PPARα enhances astroglial uptake and degradation of β-amyloid	gemfibrozil + retinoic acid	n/a	in vitro	n/a	in vivo (animal model)	oral administration of GFB-RA switched astroglial activation to a neuroprotective state, lowered Aβ burden in the brain, and improved spatial learning and memory in the 5XFAD mouse model of Alzheimer's disease	no	no	yes	mouse model of AD	using the 5XFAD mouse model of Alzheimer’s disease	2021	Sci Signal	Science Signaling	9.714
34717542	A drug repositioning algorithm based on a deep autoencoder and adaptive fusion	clozapine, pramipexole, olanzapine, carbamazepine, ethosuximide, selegiline, valproic acid	n/a	in silico	machine learning	no	identified drugs with the top 10 scores for treating Alzheimer's disease, review literature (replication only/no validation)	yes	no	no	n/a	n/a	2021	BMC Bioinformatics	BMC Bioinformatics	3.307
34743390	Antitumour drugs targeting tau R3 VQIVYK and Cys322 prevent seeding of endogenous tau aggregates by exogenous seeds	paclitaxel, docetaxel, cisplatin, oxaliplatin, doxorubicin, daunorubicin, resveratrol, quercetin	paclitaxel, resveratrol, quercetin	in vitro, in vivo	n/a	in vivo (animal model)	use Tau-RD P301S FRET Biosensor cells and Caenorhabditis elegans worms in experiments	no	no	no	n/a	n/a	2022	FEBS J	FEBS Journal	5.622
34751244	Scaffold Searching of FDA and EMA-Approved Drugs Identifies Lead Candidates for Drug Repurposing in Alzheimer's Disease	menadione bisulfite, camphotamide, unithiol, aurotioprol, acamprosate, docusate sodium, dermatan sulfate, ecamsule, sulfamazone, cefpimizole, glucosulfone, solasulfone, indocyanine green	menadione, camphotamide	in silico	structure-based	molecular docking/dynamics	filtered DrugCentral database to find candidate drugs (drugs containing the propanesulfonic scaffold of TRA); molecular docking and molecular dynamics simulations revealed menadione and camphotamide as lead candidates (identified as promising Aβ inhibitors)	no	no	no	n/a	n/a	2021	Front Chem	Frontiers in Chemistry	5.545
34813998	Drug connectivity mapping and functional analysis reveal therapeutic small molecules that differentially modulate myelination	LY294002	n/a	in silico	gene signature	in vivo (animal model)	LINCS analysis identified the small molecule kinase inhibitor LY294002 as the highest-ranking agent predicted to have both pro- and anti-oligodendroglial effects, depending on dose, which we fully validated in multiple neurobiological in vivo and ex vivo models	no	yes – focused on new therapies that promote oligodendrocyte regeneration and myelin repair	no	n/a	n/a	2022	Biomed Pharmacother	Biomedicine & Pharmacotherapy	7.419
34857772	Mapping the serum proteome to neurological diseases using whole genome sequencing	gemtuzumab, ozogamicin, lintuzumab	n/a	in silico	Mendelian randomization	no	two-sample Mendelian randomization study – identify causal associations between serum CD33 and Alzheimer's disease, no validation of signal	no	no	no	n/a	n/a	2021	Nat Commun	Nature Communications	17.694
34919634	A phase II study repurposing atomoxetine for neuroprotection in mild cognitive impairment	atomoxetine	n/a	in vivo	n/a	in vivo (clinical trial)	biomarker-driven phase II trial of atomoxetine in subjects with mild cognitive impairment due to Alzheimer's disease	no	no	yes	clinical trial	atomoxetine significantly reduced CSF Tau and pTau, normalized CSF protein biomarker panels linked to synaptic function, brain metabolism and glial immunity, and increased brain activity and metabolism in key temporal lobe circuits	2021	Brain	Brain: A Journal of Neurology	15.255
34923338	An identification of MARK inhibitors using high throughput MALDI-TOF mass spectrometry	PD173952, PD-166285 hydrate, PF-431396 hydrate, sunitinib malate, DMH4, PHA 767491 hydrochloride	PD173952, DMH4, PHA 767491 hydrochloride, sunitinib malate	in vitro	n/a	molecular docking	molecular docking with the most active inhibitors to predict their interaction with MARK4 was performed (MARK4 is an intensively studied target for treating Alzheimer's disease and other neurodegenerative diseases)	no	no	no	n/a	n/a	2022	Biomed Pharmacother	Biomedicine & Pharmacotherapy	7.419
35012639	Artificial intelligence framework identifies candidate targets for drug repurposing in Alzheimer's disease	hydralazine, ketoprofen, conjugated equine estrogens, carvedilol, fluticasone, testosterone, thymol, etodolac, dexibuprofen, naloxone, dexamethasone, oleic acid, salbutamol, estradiol, gemfibrozil, pioglitazone, febuxostat, flurbiprofen, dihydrotestosterone, mefenamic acid, progesterone, levonorgestrel, deferoxamine, acetylsalicylic acid, indomethacin, irbesartan, pseudoephedrine, isoetarine, flu…	pioglitazone, febuxostat, atenolol	in silico	network model	in vivo (patient data)	showed that three drugs (pioglitazone, febuxostat, and atenolol) are significantly associated with decreased risk of AD compared with matched control populations	no	no	yes	patient data	utilized the MarketScan Medicare Supplementary database from 2012 to 2017 (included individual-level diagnosis codes, procedure codes, and pharmacy claims for 7.23 million U.S. older adults)	2022	Alzheimers Res Ther	Alzheimer's Research & Therapy	8.831
35115528	Deep phenotyping of Alzheimer's disease leveraging electronic medical records identifies sex-specific clinical associations	dexamethasone	n/a	in silico	network model	in vivo (patient data)	utilized two independent electronic medical record (EMR) systems across 44,288 patients to perform deep clinical phenotyping and network analysis to gain insight into clinical characteristics and sex-specific clinical associations in AD; medication association analysis identifies drugs enriched in controls, dexamethasone is significant among controls in both institutions (used 2 EMRs - one was va…	no	no	yes	patient data	preliminary signal in UCSF EMR, validation analysis done with Mount Sinai EMR	2022	Nat Commun	Nature Communications	17.694
35195784	Guanabenz mitigates the neuropathological alterations and cell death in Alzheimer's disease	guanabenz	n/a	in vitro, in vivo	n/a	in vivo (animal model)	employing both cellular and rat models of AD	no	no	yes	rat model of AD	using the streptozotocin (STZ)-induced rat model of AD	2022	Cell Tissue Res	Cell and Tissue Research	4.061
35204697	DOTA: Deep Learning Optimal Transport Approach to Advance Drug Repositioning for Alzheimer's Disease	aripiprazole, quetiapine, risperidone, suvorexant, brexpiprazole, olanzapine, travoprost, betaxolol, brimonidine, ibuprofen	n/a	in silico	machine learning	no	the authors evaluate the biological functions and biochemical impact of the candidate repositioned drugs using pathway analysis, quantification of anticholinergic burden and sedative load, etc... but this is not strong validation	no	no	no	n/a	n/a	2022	Biomolecules	Biomolecules	6.064
35386099	Network-based stage-specific drug repurposing for Alzheimer's disease	clomifene, camptothecin, omacetaxine mepesuccinate, emetine, pik-90, oxibendazole, cephaeline, vinpocetine, emetine hydrochloride hydrate, vapiprost, paroxetine, gatifloxacin, piperidolate, ro 04-5595, naloxone hydrochloride, ethosuximide, perindopril, brd-k80346834, tetrabenazine, iloperidone, hydrocotarnine, bi-2536, scoulerine, mepacrine, noscapine, lomerizine	n/a	in silico	network model	no	ranked drugs, then selected subset and assessed their current status in clinical trials; also performed a retrospective computational experiment to testify to the validity of their findings – not really validation but rather replication	no	no	no	n/a	n/a	2022	Comput Struct Biotechnol J	Computational and Structural Biotechnology Journal	6.155
35394510	Comparative Risk of Alzheimer Disease and Related Dementia Among Medicare Beneficiaries With Rheumatoid Arthritis Treated With Targeted Disease-Modifying Antirheumatic Agents	tofacitinib, tocilizumab, TNF inhibitors	none (no effect)	in silico	text mining/semantic inference	in vivo (patient data)	cohort study conducted among US Medicare fee-for-service patients with rheumatoid arthritis aged 65 years and older from 2007 to 2017; patients were categorized into 3 cohorts based on initiation of tofacitinib (a JAK inhibitor), tocilizumab (an IL-6 inhibitor), or TNF inhibitors compared with a common comparator abatacept (a T-cell activation inhibitor) – this cohort study did not find any assoc…	no	no	yes	patient data	cohort study using Medicare fee-for-service claims data from 2007 through 2017	2022	JAMA Netw Open	JAMA Network Open	13.36
35401145	Identification of Potential Driver Genes and Pathways Based on Transcriptomics Data in Alzheimer's Disease	norepinephrine, dopamine, hexachlorophene, clotrimazole, dobutamine, miconazole, econazole, epinephrine, tamoxifen, triamterene, amiloride, carvedilol, adenosine	n/a	in silico	machine learning	no	identify 13 new drug-disease associations, no validation	no	yes – neurodegenerative diseases	no	n/a	n/a	2022	Front Aging Neurosci	Frontiers in Aging Neuroscience	5.702
35411386	Repurposing ibudilast to mitigate Alzheimer's disease by targeting inflammation	ibudilast, sulfasalazine, sasapyrine	ibudilast	in silico	gene signature	in vivo (animal model)	predictive modeling framework identified ibudilast as a drug with repurposing potential to treat Alzheimer's disease; evaluated in transgenic rat model	no	no	yes	rat model of AD	using Fisher transgenic 344-AD rats – 'this transgenic rat model is unique as it exhibits hippocampal-dependent spatial learning and memory deficits, and Alzheimer's disease pathology including hippocampal amyloid plaques, tau paired-helical filaments, neuronal loss and microgliosis, in a progressive age-dependent manner that mimics the pathology observed in Alzheimer's disease patients"	2022	Brain	Brain: A Journal of Neurology	15.255
35456509	Characterization of Altered Molecular Pathways in the Entorhinal Cortex of Alzheimer's Disease Patients and In Silico Prediction of Potential Repurposable Drugs	varenicline, piperacillin, riluzole, thioridazine, phenylbutazone, temsirolimus, chlorpheniramine, cisapride, trimipramine, biperiden, ivermectin, metronidazole, ribavirin, dextromethorphan, fluoxetine, fluvoxamine, lamotrigine, paroxetine, tretinoin, chlorprothixene, clemastine, methocarbamol, sunitinib, tamoxifen, thiethylperazine, granisetron, loperamide, praziquantel, diphenylpyraline, droper…	n/a	in silico	gene signature	no	170 drugs were found to have a significant anti-similarity with respect to the AD meta-signature; focused on those predicted to cross the BBB (no validation, however)	no	no	no	n/a	n/a	2022	Genes (Basel)	Genes	4.141
35510183	A hybrid approach unveils drug repurposing candidates targeting an Alzheimer pathophysiology mechanism	SIB-1757, Debio 1347, alpha pifithrin, SIB-1893, N-(4-methoxyphenyl)-1-phenyl-1H-pyrazol-3-amine, SB-206553, VU0361737, nitazoxanide, SU-4312, GW-441756, SB-366791, cyclic pifithrin, tyrphostin AG 1296, indirubin-3'-monoxime, amlexanox, resveratrol, WAY-207024, quercetin, MPEP, pixantrone dimaleate	n/a	in silico, in vitro	text mining/semantic inference	no	20 repurposing candidates identified in experimental screening; four compounds and their known targets were found to have a link to AD-specific genes (data mining from GWAS Catalog) – not considered to be validation	no	no	no	n/a	n/a	2022	Patterns (N Y)	Patterns	3.194
35518630	Bleomycin modulates amyloid aggregation in β-amyloid and hIAPP	bleomycin	n/a	in silico	structure-based	in vitro	experimental validation through in vitro amyloid aggregation assays was obtained wherein the fibrillar load was decreased for the BLM-treated Aβ and hIAPP peptides in comparison to controls molecular investigation of AD [investigating drug effect on amyloid aggregation of Aβ]	no	no	no	n/a	n/a	2020	RSC Adv	RSC Advances	4.036
35563011	The Influence of Selected Antipsychotic Drugs on Biochemical Aspects of Alzheimer's Disease	haloperidol, bromperidol, benperidol, penfluridol, pimozide, quetiapine, promazine	quetiapine, promazine	in vitro	n/a	in vitro	in vitro studies investigating the main pathological hallmarks of Alzheimer's disease (AChE inhibition, Aβ aggregation, etc...) – regarding ChEs inhibition, the most profound effects were reported for promazine and quetiapine molecular investigation of AD [investigated effects on activity of human AChE and BuChE, as well as on β-amyloid (1–42) (Aβ42) aggregation]	no	no	no	n/a	n/a	2022	Int J Mol Sci	International Journal of Molecular Sciences	6.208
35572351	Endophenotype-based in silico network medicine discovery combined with insurance record data mining identifies sildenafil as a candidate drug for Alzheimer's disease	sildenafil, captopril, vardenafil, adenosine, carvedilol, gemfibrozil, rifampicin, minocycline, riluzole, ibudilast, roflumilast, ibuprofen, cysteamine, lansoprazole, pioglitazone, sapropterin, dantrolene, nimesulide, dexibuprofen, cefuroxime, lidocaine, tetracycline, everolimus, temsirolimus, deferoxamine	sildenafil	in silico	network model	in vivo (patient data)	network proximity analysis to suggest drug candidates; sildenafil validated using retrospective case-control pharmacoepidemiologic analysis of insurance claims data for 7.23 million individuals	no	no	yes	patient data	sildenafil is significantly associated with a decreased risk of AD across all four drug cohorts we tested (diltiazem, glimepiride, losartan and metformin) after adjusting age, sex, race, and disease comorbidities	2021	Nat Aging	Nature Aging	n/a
