# Supplementary material for: Drug repurposing for Alzheimer’s disease from 2012–2022—a 10-year literature review
Source: Front Pharmacol. 2023 Sep 7;14:1257700. doi: 10.3389/fphar.2023.1257700 (PMC10512468; doi:10.3389/fphar.2023.1257700)
Supplement: Supplementary file 3 [file Table1.xlsx]

## Sheet: Supplementary Table S1
Supplementary Table S1. Studies returned by initial PubMed query.
PMID	Title	Authors	Citation	First Author	Journal/Book	Publication Year	Create Date	PMCID	NIHMS ID	DOI
33589615	Machine learning identifies candidates for drug repurposing in Alzheimer's disease	Rodriguez S, Hug C, Todorov P, Moret N, Boswell SA, Evans K, Zhou G, Johnson NT, Hyman BT, Sorger PK, Albers MW, Sokolov A.	Nat Commun. 2021 Feb 15;12(1):1033. doi: 10.1038/s41467-021-21330-0.	Rodriguez S	Nat Commun	2021	2021-02-16	PMC7884393		10.1038/s41467-021-21330-0
32656864	Harnessing endophenotypes and network medicine for Alzheimer's drug repurposing	Fang J, Pieper AA, Nussinov R, Lee G, Bekris L, Leverenz JB, Cummings J, Cheng F.	Med Res Rev. 2020 Nov;40(6):2386-2426. doi: 10.1002/med.21709. Epub 2020 Jul 13.	Fang J	Med Res Rev	2020	2020-07-14	PMC7561446	NIHMS1635679	10.1002/med.21709
32939050	Drug repositioning and repurposing for Alzheimer disease	Ballard C, Aarsland D, Cummings J, O'Brien J, Mills R, Molinuevo JL, Fladby T, Williams G, Doherty P, Corbett A, Sultana J.	Nat Rev Neurol. 2020 Dec;16(12):661-673. doi: 10.1038/s41582-020-0397-4. Epub 2020 Sep 16.	Ballard C	Nat Rev Neurol	2020	2020-09-17	PMC8291993	NIHMS1718940	10.1038/s41582-020-0397-4
34312178	Long covid-mechanisms, risk factors, and management	Crook H, Raza S, Nowell J, Young M, Edison P.	BMJ. 2021 Jul 26;374:n1648. doi: 10.1136/bmj.n1648.	Crook H	BMJ	2021	2021-07-27			10.1136/bmj.n1648
34692825	Drug Repurposing for Alzheimer's Disease Based on Protein-Protein Interaction Network	Soleimani Zakeri NS, Pashazadeh S, MotieGhader H.	Biomed Res Int. 2021 Oct 14;2021:1280237. doi: 10.1155/2021/1280237. eCollection 2021.	Soleimani Zakeri NS	Biomed Res Int	2021	2021-10-25	PMC8531773		10.1155/2021/1280237
31989900	Recent Trends in the Management of Alzheimer's Disease: Current Therapeutic Options and Drug Repurposing Approaches	Singh RK.	Curr Neuropharmacol. 2020;18(9):868-882. doi: 10.2174/1570159X18666200128121920.	Singh RK	Curr Neuropharmacol	2020	2020-01-29	PMC7569317		10.2174/1570159X18666200128121920
34360973	Novel Therapeutic Approaches for Alzheimer's Disease: An Updated Review	Yu TW, Lane HY, Lin CH.	Int J Mol Sci. 2021 Jul 30;22(15):8208. doi: 10.3390/ijms22158208.	Yu TW	Int J Mol Sci	2021	2021-08-07	PMC8348485		10.3390/ijms22158208
33627474	Multimodal single-cell/nucleus RNA sequencing data analysis uncovers molecular networks between disease-associated microglia and astrocytes with implications for drug repurposing in Alzheimer's disease	Xu J, Zhang P, Huang Y, Zhou Y, Hou Y, Bekris LM, Lathia J, Chiang CW, Li L, Pieper AA, Leverenz JB, Cummings J, Cheng F.	Genome Res. 2021 Oct;31(10):1900-1912. doi: 10.1101/gr.272484.120. Epub 2021 Feb 24.	Xu J	Genome Res	2021	2021-02-25	PMC8494225		10.1101/gr.272484.120
34276354	Computational Drug Repurposing for Alzheimer's Disease Using Risk Genes From GWAS and Single-Cell RNA Sequencing Studies	Xu Y, Kong J, Hu P.	Front Pharmacol. 2021 Jun 30;12:617537. doi: 10.3389/fphar.2021.617537. eCollection 2021.	Xu Y	Front Pharmacol	2021	2021-07-19	PMC8277916		10.3389/fphar.2021.617537
25446738	Medical genetics-based drug repurposing for Alzheimer's disease	Zhang XZ, Quan Y, Tang GY.	Brain Res Bull. 2015 Jan;110:26-9. doi: 10.1016/j.brainresbull.2014.11.003. Epub 2014 Nov 22.	Zhang XZ	Brain Res Bull	2015	2014-12-03			10.1016/j.brainresbull.2014.11.003
31492831	Drug repurposing for Alzheimer's disease based on transcriptional profiling of human iPSC-derived cortical neurons	Williams G, Gatt A, Clarke E, Corcoran J, Doherty P, Chambers D, Ballard C.	Transl Psychiatry. 2019 Sep 6;9(1):220. doi: 10.1038/s41398-019-0555-x.	Williams G	Transl Psychiatry	2019	2019-09-08	PMC6731247		10.1038/s41398-019-0555-x
35386099	Network-based stage-specific drug repurposing for Alzheimer's disease	Savva K, Zachariou M, Bourdakou MM, Dietis N, Spyrou GM.	Comput Struct Biotechnol J. 2022 Mar 16;20:1427-1438. doi: 10.1016/j.csbj.2022.03.013. eCollection 2022.	Savva K	Comput Struct Biotechnol J	2022	2022-04-07	PMC8957022		10.1016/j.csbj.2022.03.013
26197808	Bioinformatics methods in drug repurposing for Alzheimer's disease	Siavelis JC, Bourdakou MM, Athanasiadis EI, Spyrou GM, Nikita KS.	Brief Bioinform. 2016 Mar;17(2):322-35. doi: 10.1093/bib/bbv048. Epub 2015 Jul 21.	Siavelis JC	Brief Bioinform	2016	2015-07-23			10.1093/bib/bbv048
33843684	Repurposing Licensed Drugs for Use Against Alzheimer's Disease	Norins LC.	J Alzheimers Dis. 2021;81(3):921-932. doi: 10.3233/JAD-210080.	Norins LC	J Alzheimers Dis	2021	2021-04-12	PMC8293650		10.3233/JAD-210080
33718584	Systematic identification of risk factors and drug repurposing options for Alzheimer's disease	Wu C, Wu L, Wang J, Lin L, Li Y, Lu Q, Deng HW.	Alzheimers Dement (N Y). 2021 Mar 3;7(1):e12148. doi: 10.1002/trc2.12148. eCollection 2021.	Wu C	Alzheimers Dement (N Y)	2021	2021-03-15	PMC7927163		10.1002/trc2.12148
29394035	Copper Complexes in Cancer Therapy	Denoyer D, Clatworthy SAS, Cater MA.	Met Ions Life Sci. 2018 Feb 5;18:/books/9783110470734/9783110470734-022/9783110470734-022.xml. doi: 10.1515/9783110470734-022.	Denoyer D	Met Ions Life Sci	2018	2018-02-03			10.1515/9783110470734-022
31506398	[Drug Repositioning for Alzheimer's Disease]	Ihara M, Saito S.	Brain Nerve. 2019 Sep;71(9):961-970. doi: 10.11477/mf.1416201388.	Ihara M	Brain Nerve	2019	2019-09-12			10.11477/mf.1416201388
35559617	Mechanistic Insights for Drug Repurposing and the Design of Hybrid Drugs for Alzheimer's Disease	Padhi D, Govindaraju T.	J Med Chem. 2022 May 13. doi: 10.1021/acs.jmedchem.2c00335. Online ahead of print.	Padhi D	J Med Chem	2022	2022-05-13			10.1021/acs.jmedchem.2c00335
34095442	Who funds Alzheimer's disease drug development?	Cummings J, Bauzon J, Lee G.	Alzheimers Dement (N Y). 2021 May 25;7(1):e12185. doi: 10.1002/trc2.12185. eCollection 2021.	Cummings J	Alzheimers Dement (N Y)	2021	2021-06-07	PMC8145442		10.1002/trc2.12185
32164502	Repurposing Antihypertensive Drugs for the Management of Alzheimer's Disease	Law CSW, Yeong KY.	Curr Med Chem. 2021;28(9):1716-1730. doi: 10.2174/0929867327666200312114223.	Law CSW	Curr Med Chem	2021	2020-03-14			10.2174/0929867327666200312114223
25961694	Drug repositioning in Alzheimer's disease	Corbett A, Williams G, Ballard C.	Front Biosci (Schol Ed). 2015 Jun 1;7(1):184-8. doi: 10.2741/S432.	Corbett A	Front Biosci (Schol Ed)	2015	2015-05-12			10.2741/S432
32807237	Repurposed agents in the Alzheimer's disease drug development pipeline	Bauzon J, Lee G, Cummings J.	Alzheimers Res Ther. 2020 Aug 17;12(1):98. doi: 10.1186/s13195-020-00662-x.	Bauzon J	Alzheimers Res Ther	2020	2020-08-19	PMC7433208		10.1186/s13195-020-00662-x
34751244	Scaffold Searching of FDA and EMA-Approved Drugs Identifies Lead Candidates for Drug Repurposing in Alzheimer's Disease	Shityakov S, Skorb EV, Förster CY, Dandekar T.	Front Chem. 2021 Oct 22;9:736509. doi: 10.3389/fchem.2021.736509. eCollection 2021.	Shityakov S	Front Chem	2021	2021-11-09	PMC8571023		10.3389/fchem.2021.736509
33304987	Targeting abnormal metabolism in Alzheimer's disease: The Drug Repurposing for Effective Alzheimer's Medicines (DREAM) study	Desai RJ, Varma VR, Gerhard T, Segal J, Mahesri M, Chin K, Nonnenmacher E, Gabbeta A, Mammen AM, Varma S, Horton DB, Kim SC, Schneeweiss S, Thambisetty M.	Alzheimers Dement (N Y). 2020 Nov 26;6(1):e12095. doi: 10.1002/trc2.12095. eCollection 2020.	Desai RJ	Alzheimers Dement (N Y)	2020	2020-12-11	PMC7690721		10.1002/trc2.12095
34274565	Recent advances in drug repurposing using machine learning	Urbina F, Puhl AC, Ekins S.	Curr Opin Chem Biol. 2021 Dec;65:74-84. doi: 10.1016/j.cbpa.2021.06.001. Epub 2021 Jul 16.	Urbina F	Curr Opin Chem Biol	2021	2021-07-18	PMC8671152	NIHMS1716900	10.1016/j.cbpa.2021.06.001
31335937	Repurposing antihypertensive drugs for the prevention of Alzheimer's disease: a Mendelian randomization study	Walker VM, Kehoe PG, Martin RM, Davies NM.	Int J Epidemiol. 2020 Aug 1;49(4):1132-1140. doi: 10.1093/ije/dyz155.	Walker VM	Int J Epidemiol	2020	2019-07-24	PMC7751008		10.1093/ije/dyz155
33833663	Drug Repurposing in the Treatment of Traumatic Brain Injury	Ghiam MK, Patel SD, Hoffer A, Selman WR, Hoffer BJ, Hoffer ME.	Front Neurosci. 2021 Mar 23;15:635483. doi: 10.3389/fnins.2021.635483. eCollection 2021.	Ghiam MK	Front Neurosci	2021	2021-04-09	PMC8021906		10.3389/fnins.2021.635483
32063857	A Proteotranscriptomic-Based Computational Drug-Repositioning Method for Alzheimer's Disease	Lee SY, Song MY, Kim D, Park C, Park DK, Kim DG, Yoo JS, Kim YH.	Front Pharmacol. 2020 Jan 29;10:1653. doi: 10.3389/fphar.2019.01653. eCollection 2019.	Lee SY	Front Pharmacol	2020	2020-02-18	PMC7000455		10.3389/fphar.2019.01653
34875696	Opportunities for Drug Repurposing of Serotonin Reuptake Inhibitors: Potential Uses in Inflammation, Infection, Cancer, Neuroprotection, and Alzheimer's Disease Prevention	Nykamp MJ, Zorumski CF, Reiersen AM, Nicol GE, Cirrito J, Lenze EJ.	Pharmacopsychiatry. 2022 Jan;55(1):24-29. doi: 10.1055/a-1686-9620. Epub 2021 Dec 7.	Nykamp MJ	Pharmacopsychiatry	2022	2021-12-07			10.1055/a-1686-9620
34482237	Drug repurposing: small molecules against Cu(II)-amyloid-β and free radicals	Nam G, Suh JM, Yi Y, Lim MH.	J Inorg Biochem. 2021 Nov;224:111592. doi: 10.1016/j.jinorgbio.2021.111592. Epub 2021 Aug 27.	Nam G	J Inorg Biochem	2021	2021-09-05			10.1016/j.jinorgbio.2021.111592
33170091	Drug repurposing for Alzheimer's disease: in silico and in vitro investigation of FDA-approved drugs as acetylcholinesterase inhibitors	Kumar N, Gahlawat A, Kumar RN, Singh YP, Modi G, Garg P.	J Biomol Struct Dyn. 2022 Apr;40(7):2878-2892. doi: 10.1080/07391102.2020.1844054. Epub 2020 Nov 10.	Kumar N	J Biomol Struct Dyn	2022	2020-11-10			10.1080/07391102.2020.1844054
23123941	Drug repositioning for Alzheimer's disease	Corbett A, Pickett J, Burns A, Corcoran J, Dunnett SB, Edison P, Hagan JJ, Holmes C, Jones E, Katona C, Kearns I, Kehoe P, Mudher A, Passmore A, Shepherd N, Walsh F, Ballard C.	Nat Rev Drug Discov. 2012 Nov;11(11):833-46. doi: 10.1038/nrd3869.	Corbett A	Nat Rev Drug Discov	2012	2012-11-06			10.1038/nrd3869
31326236	Insights into Computational Drug Repurposing for Neurodegenerative Disease	Paranjpe MD, Taubes A, Sirota M.	Trends Pharmacol Sci. 2019 Aug;40(8):565-576. doi: 10.1016/j.tips.2019.06.003. Epub 2019 Jul 17.	Paranjpe MD	Trends Pharmacol Sci	2019	2019-07-22	PMC6771436	NIHMS1532195	10.1016/j.tips.2019.06.003
34515019	Investigating Neuroprotective Potential of Berberine, Levetiracetam and Their Combination in The Management of Alzheimer's Disease Utilizing Drug Repurposing Strategy	Singh A, Dhaneshwar S, Mazumder A.	Curr Rev Clin Exp Pharmacol. 2021 Sep 9. doi: 10.2174/2772432816666210910104306. Online ahead of print.	Singh A	Curr Rev Clin Exp Pharmacol	2021	2021-09-13			10.2174/2772432816666210910104306
29166618	iPSC-Based Compound Screening and In Vitro Trials Identify a Synergistic Anti-amyloid β Combination for Alzheimer's Disease	Kondo T, Imamura K, Funayama M, Tsukita K, Miyake M, Ohta A, Woltjen K, Nakagawa M, Asada T, Arai T, Kawakatsu S, Izumi Y, Kaji R, Iwata N, Inoue H.	Cell Rep. 2017 Nov 21;21(8):2304-2312. doi: 10.1016/j.celrep.2017.10.109.	Kondo T	Cell Rep	2017	2017-11-23			10.1016/j.celrep.2017.10.109
32144994	Drug Repositioning for Alzheimer's Disease: Finding Hidden Clues in Old Drugs	Ihara M, Saito S.	J Alzheimers Dis. 2020;74(4):1013-1028. doi: 10.3233/JAD-200049.	Ihara M	J Alzheimers Dis	2020	2020-03-08			10.3233/JAD-200049
34944450	Molecular Aspects of Cellular Dysfunction in Alzheimer's Disease: The Need for a Holistic View of the Early Pathogenesis	Merlo S, Spampinato SF, Lim D.	Biomolecules. 2021 Dec 1;11(12):1807. doi: 10.3390/biom11121807.	Merlo S	Biomolecules	2021	2021-12-24	PMC8699369		10.3390/biom11121807
27834781	Do Cancer Drugs Counteract Neurodegeneration? Repurposing for Alzheimer's Disease	Monacelli F, Cea M, Borghi R, Odetti P, Nencioni A.	J Alzheimers Dis. 2017;55(4):1295-1306. doi: 10.3233/JAD-160840.	Monacelli F	J Alzheimers Dis	2017	2016-11-12			10.3233/JAD-160840
29078760	In silico repurposing of antipsychotic drugs for Alzheimer's disease	Kumar S, Chowdhury S, Kumar S.	BMC Neurosci. 2017 Oct 27;18(1):76. doi: 10.1186/s12868-017-0394-8.	Kumar S	BMC Neurosci	2017	2017-10-29	PMC5660441		10.1186/s12868-017-0394-8
25549849	Drug repositioning approaches for the discovery of new therapeutics for Alzheimer's disease	Kim TW.	Neurotherapeutics. 2015 Jan;12(1):132-42. doi: 10.1007/s13311-014-0325-7.	Kim TW	Neurotherapeutics	2015	2015-01-01	PMC4322062		10.1007/s13311-014-0325-7
34683919	Active Targeted Nanoemulsions for Repurposing of Tegaserod in Alzheimer's Disease Treatment	Séguy L, Guyon L, Maurel M, Verdié P, Davis A, Corvaisier S, Lisowski V, Dallemagne P, Groo AC, Malzert-Fréon A.	Pharmaceutics. 2021 Oct 6;13(10):1626. doi: 10.3390/pharmaceutics13101626.	Séguy L	Pharmaceutics	2021	2021-10-23	PMC8540544		10.3390/pharmaceutics13101626
32990004	Alzheimer's drug Memantine inhibits metastasis and p-Erk protein expression on 4T1 breast cancer cells	Albayrak G, Korkmaz FD.	Bratisl Lek Listy. 2020;121(7):499-503. doi: 10.4149/BLL_2020_082.	Albayrak G	Bratisl Lek Listy	2020	2020-09-29			10.4149/BLL_2020_082
32867634	Tackling Alzheimer's Disease with Existing Drugs: A Promising Strategy for Bypassing Obstacles	Rampa A, Gobbi S, Belluti F, Bisi A.	Curr Med Chem. 2021;28(12):2305-2327. doi: 10.2174/0929867327666200831140745.	Rampa A	Curr Med Chem	2021	2020-09-02			10.2174/0929867327666200831140745
34121565	Repurposing ibuprofen-loaded microemulsion for the management of Alzheimer's disease: evidence of potential intranasal brain targeting	Wen MM, Ismail NIK, Nasra MMA, El-Kamel AH.	Drug Deliv. 2021 Dec;28(1):1188-1203. doi: 10.1080/10717544.2021.1937383.	Wen MM	Drug Deliv	2021	2021-06-14	PMC8205090		10.1080/10717544.2021.1937383
31019997	Repurposing the KCa3.1 inhibitor senicapoc for Alzheimer's disease	Jin LW, Lucente JD, Nguyen HM, Singh V, Singh L, Chavez M, Bushong T, Wulff H, Maezawa I.	Ann Clin Transl Neurol. 2019 Mar 18;6(4):723-738. doi: 10.1002/acn3.754. eCollection 2019 Apr.	Jin LW	Ann Clin Transl Neurol	2019	2019-04-26	PMC6469250		10.1002/acn3.754
31116390	deepDR: a network-based deep learning approach to in silico drug repositioning	Zeng X, Zhu S, Liu X, Zhou Y, Nussinov R, Cheng F.	Bioinformatics. 2019 Dec 15;35(24):5191-5198. doi: 10.1093/bioinformatics/btz418.	Zeng X	Bioinformatics	2019	2019-05-23	PMC6954645		10.1093/bioinformatics/btz418
32516365	Screening novel drug candidates for Alzheimer's disease by an integrated network and transcriptome analysis	Peng Y, Yuan M, Xin J, Liu X, Wang J.	Bioinformatics. 2020 Nov 1;36(17):4626-4632. doi: 10.1093/bioinformatics/btaa563.	Peng Y	Bioinformatics	2020	2020-06-10			10.1093/bioinformatics/btaa563
31714636	Lipid lowering and Alzheimer disease risk: A mendelian randomization study	Williams DM, Finan C, Schmidt AF, Burgess S, Hingorani AD.	Ann Neurol. 2020 Jan;87(1):30-39. doi: 10.1002/ana.25642.	Williams DM	Ann Neurol	2020	2019-11-13	PMC6944510	EMS85284	10.1002/ana.25642
34699252	Activation of PPARα enhances astroglial uptake and degradation of β-amyloid	Raha S, Ghosh A, Dutta D, Patel DR, Pahan K.	Sci Signal. 2021 Oct 26;14(706):eabg4747. doi: 10.1126/scisignal.abg4747. Epub 2021 Oct 26.	Raha S	Sci Signal	2021	2021-10-26	PMC8793854	NIHMS1766094	10.1126/scisignal.abg4747
32854858	Antidiabetic drugs for Alzheimer's and Parkinson's diseases: Repurposing insulin, metformin, and thiazolidinediones	Cardoso S, Moreira PI.	Int Rev Neurobiol. 2020;155:37-64. doi: 10.1016/bs.irn.2020.02.010. Epub 2020 Aug 11.	Cardoso S	Int Rev Neurobiol	2020	2020-08-29			10.1016/bs.irn.2020.02.010
32673703	Phosphodiesterase-4 enzyme as a therapeutic target in neurological disorders	Bhat A, Ray B, Mahalakshmi AM, Tuladhar S, Nandakumar DN, Srinivasan M, Essa MM, Chidambaram SB, Guillemin GJ, Sakharkar MK.	Pharmacol Res. 2020 Oct;160:105078. doi: 10.1016/j.phrs.2020.105078. Epub 2020 Jul 14.	Bhat A	Pharmacol Res	2020	2020-07-17			10.1016/j.phrs.2020.105078
33453224	β-lactam antibiotics to tame down molecular pathways of Alzheimer's disease	Kumari S, Deshmukh R.	Eur J Pharmacol. 2021 Mar 15;895:173877. doi: 10.1016/j.ejphar.2021.173877. Epub 2021 Jan 14.	Kumari S	Eur J Pharmacol	2021	2021-01-16			10.1016/j.ejphar.2021.173877
34951390	Potential roles of α-amylase in Alzheimer's disease: Biomarker and drug target	Chen WN, Tang KS, Yeong KY.	Curr Neuropharmacol. 2021 Dec 23. doi: 10.2174/1570159X20666211223124715. Online ahead of print.	Chen WN	Curr Neuropharmacol	2021	2021-12-24			10.2174/1570159X20666211223124715
27199640	One for All? Hitting Multiple Alzheimer's Disease Targets with One Drug	Hughes RE, Nikolic K, Ramsay RR.	Front Neurosci. 2016 Apr 25;10:177. doi: 10.3389/fnins.2016.00177. eCollection 2016.	Hughes RE	Front Neurosci	2016	2016-05-21	PMC4842778		10.3389/fnins.2016.00177
33952306	Anticancer drugs repurposed for Alzheimer's disease: a systematic review	Ancidoni A, Bacigalupo I, Remoli G, Lacorte E, Piscopo P, Sarti G, Corbo M, Vanacore N, Canevelli M.	Alzheimers Res Ther. 2021 May 5;13(1):96. doi: 10.1186/s13195-021-00831-6.	Ancidoni A	Alzheimers Res Ther	2021	2021-05-06	PMC8101105		10.1186/s13195-021-00831-6
33295676	Artificial intelligence and machine learning-aided drug discovery in central nervous system diseases: State-of-the-arts and future directions	Vatansever S, Schlessinger A, Wacker D, Kaniskan HÜ, Jin J, Zhou MM, Zhang B.	Med Res Rev. 2021 May;41(3):1427-1473. doi: 10.1002/med.21764. Epub 2020 Dec 9.	Vatansever S	Med Res Rev	2021	2020-12-09	PMC8043990	NIHMS1650992	10.1002/med.21764
33916819	Glycosaminoglycans from Litopenaeus vannamei Inhibit the Alzheimer's Disease β Secretase, BACE1	Mycroft-West CJ, Devlin AJ, Cooper LC, Guimond SE, Procter P, Guerrini M, Miller GJ, Fernig DG, Yates EA, Lima MA, Skidmore MA.	Mar Drugs. 2021 Apr 3;19(4):203. doi: 10.3390/md19040203.	Mycroft-West CJ	Mar Drugs	2021	2021-04-30	PMC8067017		10.3390/md19040203
33946588	Alzheimer's Disease-Rationales for Potential Treatment with the Thrombin Inhibitor Dabigatran	Grossmann K.	Int J Mol Sci. 2021 Apr 30;22(9):4805. doi: 10.3390/ijms22094805.	Grossmann K	Int J Mol Sci	2021	2021-05-05	PMC8125318		10.3390/ijms22094805
34555615	Targeting transthyretin in Alzheimer's disease: Drug discovery of small-molecule chaperones as disease-modifying drug candidates for Alzheimer's disease	Cotrina EY, Santos LM, Rivas J, Blasi D, Leite JP, Liz MA, Busquets MA, Planas A, Prohens R, Gimeno A, Jiménez-Barbero J, Gales L, Llop J, Quintana J, Cardoso I, Arsequell G.	Eur J Med Chem. 2021 Dec 15;226:113847. doi: 10.1016/j.ejmech.2021.113847. Epub 2021 Sep 14.	Cotrina EY	Eur J Med Chem	2021	2021-09-23			10.1016/j.ejmech.2021.113847
30101709	Insights into the Drug Repositioning Applied to the Alzheimer's Disease Treatment and Future Perspectives	de Castro AA, da Cunha EFF, Pereira AF, Soares FV, Leal DHS, Kuca K, Ramalho TC.	Curr Alzheimer Res. 2018;15(12):1161-1178. doi: 10.2174/1567205015666180813150703.	de Castro AA	Curr Alzheimer Res	2018	2018-08-14			10.2174/1567205015666180813150703
34020681	Repurposing beta-3 adrenergic receptor agonists for Alzheimer's disease: beneficial effects in a mouse model	Tournissac M, Vu TM, Vrabic N, Hozer C, Tremblay C, Mélançon K, Planel E, Pifferi F, Calon F.	Alzheimers Res Ther. 2021 May 21;13(1):103. doi: 10.1186/s13195-021-00842-3.	Tournissac M	Alzheimers Res Ther	2021	2021-05-22	PMC8140479		10.1186/s13195-021-00842-3
33087034	Old Drugs with New Tricks: Paradigm in Drug Development Pipeline for Alzheimer's Disease	Dalvi T, Dewangan B, Das R, Rani J, Shinde SD, Vhora N, Jain A, Sahu B.	Cent Nerv Syst Agents Med Chem. 2020;20(3):157-176. doi: 10.2174/1871524920666201021164805.	Dalvi T	Cent Nerv Syst Agents Med Chem	2020	2020-10-22			10.2174/1871524920666201021164805
24059463	Discovering new treatments for Alzheimer's disease by repurposing approved medications	Appleby BS, Cummings JL.	Curr Top Med Chem. 2013;13(18):2306-27. doi: 10.2174/15680266113136660162.	Appleby BS	Curr Top Med Chem	2013	2013-09-25			10.2174/15680266113136660162
30314892	Re-thinking Alzheimer's disease therapeutic targets using gene-based tests	Kwok MK, Lin SL, Schooling CM.	EBioMedicine. 2018 Nov;37:461-470. doi: 10.1016/j.ebiom.2018.10.001. Epub 2018 Oct 9.	Kwok MK	EBioMedicine	2018	2018-10-14	PMC6446018		10.1016/j.ebiom.2018.10.001
32413333	Disulfiram Treatment Normalizes Body Weight in Obese Mice	Bernier M, Mitchell SJ, Wahl D, Diaz A, Singh A, Seo W, Wang M, Ali A, Kaiser T, Price NL, Aon MA, Kim EY, Petr MA, Cai H, Warren A, Di Germanio C, Di Francesco A, Fishbein K, Guiterrez V, Harney D, Koay YC, Mach J, Enamorado IN, Pulpitel T, Wang Y, Zhang J, Zhang L, Spencer RG, Becker KG, Egan JM, Lakatta EG, O'Sullivan J, Larance M, LeCouteur DG, Cogger VC, Gao B, Fernandez-Hernando C, Cuervo A…	Cell Metab. 2020 Aug 4;32(2):203-214.e4. doi: 10.1016/j.cmet.2020.04.019. Epub 2020 May 14.	Bernier M	Cell Metab	2020	2020-05-16	PMC7957855	NIHMS1591438	10.1016/j.cmet.2020.04.019
28005991	Drug Repositioning for Alzheimer's Disease Based on Systematic 'omics' Data Mining	Zhang M, Schmitt-Ulms G, Sato C, Xi Z, Zhang Y, Zhou Y, St George-Hyslop P, Rogaeva E.	PLoS One. 2016 Dec 22;11(12):e0168812. doi: 10.1371/journal.pone.0168812. eCollection 2016.	Zhang M	PLoS One	2016	2016-12-23	PMC5179106		10.1371/journal.pone.0168812
34219594	Potential alternatives to current cholinesterase inhibitors: an in silico drug repurposing approach	Kundu D, Dubey VK.	Drug Dev Ind Pharm. 2021 Jun;47(6):919-930. doi: 10.1080/03639045.2021.1952216. Epub 2021 Jul 27.	Kundu D	Drug Dev Ind Pharm	2021	2021-07-05			10.1080/03639045.2021.1952216
34909657	Gauging the role and impact of drug interactions and repurposing in neurodegenerative disorders	Khatri DK, Kadbhane A, Patel M, Nene S, Atmakuri S, Srivastava S, Singh SB.	Curr Res Pharmacol Drug Discov. 2021 Apr 8;2:100022. doi: 10.1016/j.crphar.2021.100022. eCollection 2021.	Khatri DK	Curr Res Pharmacol Drug Discov	2021	2021-12-15	PMC8663985		10.1016/j.crphar.2021.100022
35411386	Repurposing ibudilast to mitigate Alzheimer's disease by targeting inflammation	Oliveros G, Wallace CH, Chaudry O, Liu Q, Qiu Y, Xie L, Rockwell P, Figueiredo-Pereira ME, Serrano PA.	Brain. 2022 Apr 12:awac136. doi: 10.1093/brain/awac136. Online ahead of print.	Oliveros G	Brain	2022	2022-04-12			10.1093/brain/awac136
34193504	Repurposing bromocriptine for Aβ metabolism in Alzheimer's disease (REBRAnD) study: randomised placebo-controlled double-blind comparative trial and open-label extension trial to investigate the safety and efficacy of bromocriptine in Alzheimer's disease with presenilin 1 (PSEN1) mutations	Kondo T, Banno H, Okunomiya T, Amino Y, Endo K, Nakakura A, Uozumi R, Kinoshita A, Tada H, Morita S, Ishikawa H, Shindo A, Yasuda K, Taruno Y, Maki T, Suehiro T, Mori K, Ikeda M, Fujita K, Izumi Y, Kanemaru K, Ishii K, Shigenobu K, Kutoku Y, Sunada Y, Kawakatsu S, Shiota S, Watanabe T, Uchikawa O, Takahashi R, Tomimoto H, Inoue H.	BMJ Open. 2021 Jun 30;11(6):e051343. doi: 10.1136/bmjopen-2021-051343.	Kondo T	BMJ Open	2021	2021-07-01	PMC8246358		10.1136/bmjopen-2021-051343
23531187	Potential repurposing of oncology drugs for the treatment of Alzheimer's disease	Araki W.	BMC Med. 2013 Mar 26;11:82. doi: 10.1186/1741-7015-11-82.	Araki W	BMC Med	2013	2013-03-28	PMC3655040		10.1186/1741-7015-11-82
28084618	Drugs in Clinical Trials for Alzheimer's Disease: The Major Trends	Bachurin SO, Bovina EV, Ustyugov AA.	Med Res Rev. 2017 Sep;37(5):1186-1225. doi: 10.1002/med.21434. Epub 2017 Jan 13.	Bachurin SO	Med Res Rev	2017	2017-01-14			10.1002/med.21434
31775359	A Prospective Repurposing of Dantrolene as a Multitarget Agent for Alzheimer's Disease	Bolognino I, Giangregorio N, Pisani L, de Candia M, Purgatorio R, Tonazzi A, Altomare CD, Cellamare S, Catto M.	Molecules. 2019 Nov 25;24(23):4298. doi: 10.3390/molecules24234298.	Bolognino I	Molecules	2019	2019-11-29	PMC6930524		10.3390/molecules24234298
28595531	Repurposed Drugs as Potential Therapeutic Candidates for the Management of Alzheimer's Disease	Shoaib M, Kamal MA, Rizvi SMD.	Curr Drug Metab. 2017;18(9):842-852. doi: 10.2174/1389200218666170607101622.	Shoaib M	Curr Drug Metab	2017	2017-06-10			10.2174/1389200218666170607101622
32438758	Robust Sampling of Defective Pathways in Alzheimer's Disease. Implications in Drug Repositioning	Fernández-Martínez JL, Álvarez-Machancoses Ó, de Andrés-Galiana EJ, Bea G, Kloczkowski A.	Int J Mol Sci. 2020 May 19;21(10):3594. doi: 10.3390/ijms21103594.	Fernández-Martínez JL	Int J Mol Sci	2020	2020-05-23	PMC7279419		10.3390/ijms21103594
32852876	Novel therapeutic strategies for Alzheimer's disease targeting brain cholesterol homeostasis	Samant NP, Gupta GL.	Eur J Neurosci. 2021 Jan;53(2):673-686. doi: 10.1111/ejn.14949. Epub 2020 Sep 18.	Samant NP	Eur J Neurosci	2021	2020-08-28			10.1111/ejn.14949
28031923	The case of galantamine: repurposing and late blooming of a cholinergic drug	Mucke HA.	Future Sci OA. 2015 Sep 3;1(4):FSO73. doi: 10.4155/fso.15.73. eCollection 2015 Nov.	Mucke HA	Future Sci OA	2015	2016-12-30	PMC5137937		10.4155/fso.15.73
29199645	Epigenetic Drug Repositioning for Alzheimer's Disease Based on Epigenetic Targets in Human Interactome	Chatterjee P, Roy D, Rathi N.	J Alzheimers Dis. 2018;61(1):53-65. doi: 10.3233/JAD-161104.	Chatterjee P	J Alzheimers Dis	2018	2017-12-05			10.3233/JAD-161104
35012639	Artificial intelligence framework identifies candidate targets for drug repurposing in Alzheimer's disease	Fang J, Zhang P, Wang Q, Chiang CW, Zhou Y, Hou Y, Xu J, Chen R, Zhang B, Lewis SJ, Leverenz JB, Pieper AA, Li B, Li L, Cummings J, Cheng F.	Alzheimers Res Ther. 2022 Jan 10;14(1):7. doi: 10.1186/s13195-021-00951-z.	Fang J	Alzheimers Res Ther	2022	2022-01-11	PMC8751379		10.1186/s13195-021-00951-z
33375448	Is There Justification to Treat Neurodegenerative Disorders by Repurposing Drugs? The Case of Alzheimer's Disease, Lithium, and Autophagy	Damri O, Shemesh N, Agam G.	Int J Mol Sci. 2020 Dec 27;22(1):189. doi: 10.3390/ijms22010189.	Damri O	Int J Mol Sci	2020	2020-12-30	PMC7795249		10.3390/ijms22010189
33441136	AlzGPS: a genome-wide positioning systems platform to catalyze multi-omics for Alzheimer's drug discovery	Zhou Y, Fang J, Bekris LM, Kim YH, Pieper AA, Leverenz JB, Cummings J, Cheng F.	Alzheimers Res Ther. 2021 Jan 13;13(1):24. doi: 10.1186/s13195-020-00760-w.	Zhou Y	Alzheimers Res Ther	2021	2021-01-14	PMC7804907		10.1186/s13195-020-00760-w
33274491	Disproportionality analysis in VigiBase as a drug repositioning method for the discovery of potentially useful drugs in Alzheimer's disease	Chrétien B, Jourdan JP, Davis A, Fedrizzi S, Bureau R, Sassier M, Rochais C, Alexandre J, Lelong-Boulouard V, Dolladille C, Dallemagne P.	Br J Clin Pharmacol. 2021 Jul;87(7):2830-2837. doi: 10.1111/bcp.14690. Epub 2020 Dec 23.	Chrétien B	Br J Clin Pharmacol	2021	2020-12-04			10.1111/bcp.14690
30918344	Donepezil, a drug for Alzheimer's disease, promotes oligodendrocyte generation and remyelination	Cui X, Guo YE, Fang JH, Shi CJ, Suo N, Zhang R, Xie X.	Acta Pharmacol Sin. 2019 Nov;40(11):1386-1393. doi: 10.1038/s41401-018-0206-4. Epub 2019 Mar 27.	Cui X	Acta Pharmacol Sin	2019	2019-03-29	PMC6888883		10.1038/s41401-018-0206-4
34477536	Targeted delivery of montelukast for treatment of Alzheimer's disease	Datusalia AK, Singh G, Yadav N, Gaun S, Manik M, Singh RK.	CNS Neurol Disord Drug Targets. 2021 Sep 2. doi: 10.2174/1871527320666210902163756. Online ahead of print.	Datusalia AK	CNS Neurol Disord Drug Targets	2021	2021-09-03			10.2174/1871527320666210902163756
31792364	Blood biomarkers for memory: toward early detection of risk for Alzheimer disease, pharmacogenomics, and repurposed drugs	Niculescu AB, Le-Niculescu H, Roseberry K, Wang S, Hart J, Kaur A, Robertson H, Jones T, Strasburger A, Williams A, Kurian SM, Lamb B, Shekhar A, Lahiri DK, Saykin AJ.	Mol Psychiatry. 2020 Aug;25(8):1651-1672. doi: 10.1038/s41380-019-0602-2. Epub 2019 Dec 2.	Niculescu AB	Mol Psychiatry	2020	2019-12-04	PMC7387316		10.1038/s41380-019-0602-2
34095679	Therapeutic Targeting of Repurposed Anticancer Drugs in Alzheimer's Disease: Using the Multiomics Approach	Advani D, Kumar P.	ACS Omega. 2021 May 19;6(21):13870-13887. doi: 10.1021/acsomega.1c01526. eCollection 2021 Jun 1.	Advani D	ACS Omega	2021	2021-06-07	PMC8173619		10.1021/acsomega.1c01526
29214114	Calcium Dysregulation in Alzheimer's Disease: A Target for New Drug Development	Wang Y, Shi Y, Wei H.	J Alzheimers Dis Parkinsonism. 2017 Aug;7(5):374. doi: 10.4172/2161-0460.1000374. Epub 2017 Sep 15.	Wang Y	J Alzheimers Dis Parkinsonism	2017	2017-12-08	PMC5713908	NIHMS922518	10.4172/2161-0460.1000374
30993533	Biological Hallmarks of Cancer in Alzheimer's Disease	Nudelman KNH, McDonald BC, Lahiri DK, Saykin AJ.	Mol Neurobiol. 2019 Oct;56(10):7173-7187. doi: 10.1007/s12035-019-1591-5. Epub 2019 Apr 16.	Nudelman KNH	Mol Neurobiol	2019	2019-04-18	PMC6728183	NIHMS1527190	10.1007/s12035-019-1591-5
34121170	A review of the mechanisms underlying selected comorbidities in Alzheimer's disease	Maciejewska K, Czarnecka K, Szymański P.	Pharmacol Rep. 2021 Dec;73(6):1565-1581. doi: 10.1007/s43440-021-00293-5. Epub 2021 Jun 13.	Maciejewska K	Pharmacol Rep	2021	2021-06-14	PMC8599320		10.1007/s43440-021-00293-5
34439596	Unsupervised Machine Learning to Identify Separable Clinical Alzheimer's Disease Sub-Populations	Prakash J, Wang V, Quinn RE 3rd, Mitchell CS.	Brain Sci. 2021 Jul 23;11(8):977. doi: 10.3390/brainsci11080977.	Prakash J	Brain Sci	2021	2021-08-27	PMC8392842		10.3390/brainsci11080977
35219701	Therapeutic strategies for tauopathies and drug repurposing as a potential approach	Islam M, Shen F, Regmi D, Du D.	Biochem Pharmacol. 2022 Apr;198:114979. doi: 10.1016/j.bcp.2022.114979. Epub 2022 Feb 24.	Islam M	Biochem Pharmacol	2022	2022-02-27			10.1016/j.bcp.2022.114979
32657175	Discontinued disease-modifying therapies for Alzheimer's disease: status and future perspectives	Imbimbo BP, Lozupone M, Watling M, Panza F.	Expert Opin Investig Drugs. 2020 Sep;29(9):919-933. doi: 10.1080/13543784.2020.1795127. Epub 2020 Jul 26.	Imbimbo BP	Expert Opin Investig Drugs	2020	2020-07-14			10.1080/13543784.2020.1795127
28430857	Repurposed drugs targeting eIF2&alpha;-P-mediated translational repression prevent neurodegeneration in mice	Halliday M, Radford H, Zents KAM, Molloy C, Moreno JA, Verity NC, Smith E, Ortori CA, Barrett DA, Bushell M, Mallucci GR.	Brain. 2017 Jun 1;140(6):1768-1783. doi: 10.1093/brain/awx074.	Halliday M	Brain	2017	2017-04-22	PMC5445255		10.1093/brain/awx074
27320328	Rexinoids as Therapeutics for Alzheimer's Disease: Role of APOE	Koster KP, Smith C, Valencia-Olvera AC, Thatcher GR, Tai LM, LaDu MJ.	Curr Top Med Chem. 2017;17(6):708-720. doi: 10.2174/1568026616666160617090227.	Koster KP	Curr Top Med Chem	2017	2016-06-21			10.2174/1568026616666160617090227
30165077	CNS repurposing - Potential new uses for old drugs: Examples of screens for Alzheimer's disease, Parkinson's disease and spasticity	Parsons CG.	Neuropharmacology. 2019 Mar 15;147:4-10. doi: 10.1016/j.neuropharm.2018.08.027. Epub 2018 Aug 27.	Parsons CG	Neuropharmacology	2019	2018-08-31			10.1016/j.neuropharm.2018.08.027
33343293	Repositioning of Immunomodulators: A Ray of Hope for Alzheimer's Disease?	Munafò A, Burgaletto C, Di Benedetto G, Di Mauro M, Di Mauro R, Bernardini R, Cantarella G.	Front Neurosci. 2020 Dec 4;14:614643. doi: 10.3389/fnins.2020.614643. eCollection 2020.	Munafò A	Front Neurosci	2020	2020-12-21	PMC7746859		10.3389/fnins.2020.614643
35304223	Enhancing autophagy in Alzheimer's disease through drug repositioning	Eshraghi M, Ahmadi M, Afshar S, Lorzadeh S, Adlimoghaddam A, Rezvani Jalal N, West R, Dastghaib S, Igder S, Torshizi SRN, Mahmoodzadeh A, Mokarram P, Madrakian T, Albensi BC, Łos MJ, Ghavami S, Pecic S.	Pharmacol Ther. 2022 Mar 16;237:108171. doi: 10.1016/j.pharmthera.2022.108171. Online ahead of print.	Eshraghi M	Pharmacol Ther	2022	2022-03-19			10.1016/j.pharmthera.2022.108171
30738020	Scope of new formulation approaches in the repurposing of pioglitazone for the management of Alzheimer's disease	Jojo GM, Kuppusamy G.	J Clin Pharm Ther. 2019 Jun;44(3):337-348. doi: 10.1111/jcpt.12808. Epub 2019 Feb 9.	Jojo GM	J Clin Pharm Ther	2019	2019-02-10			10.1111/jcpt.12808
34881778	Applied machine learning in Alzheimer's disease research: omics, imaging, and clinical data	Li Z, Jiang X, Wang Y, Kim Y.	Emerg Top Life Sci. 2021 Dec 21;5(6):765-777. doi: 10.1042/ETLS20210249.	Li Z	Emerg Top Life Sci	2021	2021-12-09	PMC8786302		10.1042/ETLS20210249
33377311	Repurposing FDA-Approved Compounds for the Discovery of Glutaminyl Cyclase Inhibitors as Drugs Against Alzheimer's Disease	Xu C, Zou H, Yu X, Xie Y, Cai J, Shang Q, Ouyang N, Wang Y, Xu P, He Z, Wu H.	ChemistryOpen. 2021 Sep;10(9):877-881. doi: 10.1002/open.202000235. Epub 2020 Dec 30.	Xu C	ChemistryOpen	2021	2020-12-30	PMC8409088		10.1002/open.202000235
29562518	Metabolic Dysfunction in Alzheimer's Disease: From Basic Neurobiology to Clinical Approaches	Clarke JR, Ribeiro FC, Frozza RL, De Felice FG, Lourenco MV.	J Alzheimers Dis. 2018;64(s1):S405-S426. doi: 10.3233/JAD-179911.	Clarke JR	J Alzheimers Dis	2018	2018-03-23			10.3233/JAD-179911
34030115	Drug repurposing for hyperlipidemia associated disorders: An integrative network biology and machine learning approach	Rai S, Bhatia V, Bhatnagar S.	Comput Biol Chem. 2021 Jun;92:107505. doi: 10.1016/j.compbiolchem.2021.107505. Epub 2021 May 7.	Rai S	Comput Biol Chem	2021	2021-05-24			10.1016/j.compbiolchem.2021.107505
33941241	Artificial intelligence-based computational framework for drug-target prioritization and inference of novel repositionable drugs for Alzheimer's disease	Tsuji S, Hase T, Yachie-Kinoshita A, Nishino T, Ghosh S, Kikuchi M, Shimokawa K, Aburatani H, Kitano H, Tanaka H.	Alzheimers Res Ther. 2021 May 3;13(1):92. doi: 10.1186/s13195-021-00826-3.	Tsuji S	Alzheimers Res Ther	2021	2021-05-04	PMC8091739		10.1186/s13195-021-00826-3
33722677	Inhibitory mechanism of an antifungal drug, caspofungin against amyloid β peptide aggregation: Repurposing via neuroinformatics and an experimental approach	Kumari A, Shrivastava N, Mishra M, Somvanshi P, Grover A.	Mol Cell Neurosci. 2021 Apr;112:103612. doi: 10.1016/j.mcn.2021.103612. Epub 2021 Mar 12.	Kumari A	Mol Cell Neurosci	2021	2021-03-16			10.1016/j.mcn.2021.103612
30240876	The leukotriene signaling pathway: a druggable target in Alzheimer's disease	Michael J, Marschallinger J, Aigner L.	Drug Discov Today. 2019 Feb;24(2):505-516. doi: 10.1016/j.drudis.2018.09.008. Epub 2018 Sep 18.	Michael J	Drug Discov Today	2019	2018-09-22			10.1016/j.drudis.2018.09.008
31593530	Cholinesterase Inhibitors for Alzheimer's Disease: Multitargeting Strategy Based on Anti-Alzheimer's Drugs Repositioning	Kabir MT, Uddin MS, Begum MM, Thangapandiyan S, Rahman MS, Aleya L, Mathew B, Ahmed M, Barreto GE, Ashraf GM.	Curr Pharm Des. 2019;25(33):3519-3535. doi: 10.2174/1381612825666191008103141.	Kabir MT	Curr Pharm Des	2019	2019-10-09			10.2174/1381612825666191008103141
32407924	Future avenues for Alzheimer's disease detection and therapy: liquid biopsy, intracellular signaling modulation, systems pharmacology drug discovery	Hampel H, Vergallo A, Caraci F, Cuello AC, Lemercier P, Vellas B, Giudici KV, Baldacci F, Hänisch B, Haberkamp M, Broich K, Nisticò R, Emanuele E, Llavero F, Zugaza JL, Lucía A, Giacobini E, Lista S; Alzheimer Precision Medicine Initiative.	Neuropharmacology. 2021 Mar 1;185:108081. doi: 10.1016/j.neuropharm.2020.108081. Epub 2020 May 11.	Hampel H	Neuropharmacology	2021	2020-05-15			10.1016/j.neuropharm.2020.108081
24992196	Latest treatment options for Alzheimer's disease, Parkinson's disease dementia and dementia with Lewy bodies	Broadstock M, Ballard C, Corbett A.	Expert Opin Pharmacother. 2014 Sep;15(13):1797-810. doi: 10.1517/14656566.2014.936848. Epub 2014 Jul 3.	Broadstock M	Expert Opin Pharmacother	2014	2014-07-04			10.1517/14656566.2014.936848
34532569	Integrative Network-Based Analysis Reveals Gene Networks and Novel Drug Repositioning Candidates for Alzheimer Disease	Gerring ZF, Gamazon ER, White A, Derks EM.	Neurol Genet. 2021 Sep 9;7(5):e622. doi: 10.1212/NXG.0000000000000622. eCollection 2021 Oct.	Gerring ZF	Neurol Genet	2021	2021-09-17	PMC8441674		10.1212/NXG.0000000000000622
33727095	Lapatinib ditosylate rescues memory impairment in D-galactose/ovariectomized rats: Potential repositioning of an anti-cancer drug for the treatment of Alzheimer's disease	Mansour HM, Fawzy HM, El-Khatib AS, Khattab MM.	Exp Neurol. 2021 Jul;341:113697. doi: 10.1016/j.expneurol.2021.113697. Epub 2021 Mar 13.	Mansour HM	Exp Neurol	2021	2021-03-17			10.1016/j.expneurol.2021.113697
29935546	Alzheimer's disease master regulators analysis: search for potential molecular targets and drug repositioning candidates	Vargas DM, De Bastiani MA, Zimmer ER, Klamt F.	Alzheimers Res Ther. 2018 Jun 23;10(1):59. doi: 10.1186/s13195-018-0394-7.	Vargas DM	Alzheimers Res Ther	2018	2018-06-25	PMC6015462		10.1186/s13195-018-0394-7
28490260	Emerging treatments for Alzheimer's disease for non-amyloid and non-tau targets	Khan A, Corbett A, Ballard C.	Expert Rev Neurother. 2017 Jul;17(7):683-695. doi: 10.1080/14737175.2017.1326818. Epub 2017 May 18.	Khan A	Expert Rev Neurother	2017	2017-05-12			10.1080/14737175.2017.1326818
28123400	Six psychotropics for pre-symptomatic & early Alzheimer's (MCI), Parkinson's, and Huntington's disease modification	Lauterbach EC.	Neural Regen Res. 2016 Nov;11(11):1712-1726. doi: 10.4103/1673-5374.194708.	Lauterbach EC	Neural Regen Res	2016	2017-01-27	PMC5204212		10.4103/1673-5374.194708
28655823	Can an FDA-Approved Alzheimer's Drug Be Repurposed for Alleviating Neuronal Symptoms of Zika Virus?	Sirohi D, Kuhn RJ.	mBio. 2017 Jun 27;8(3):e00916-17. doi: 10.1128/mBio.00916-17.	Sirohi D	mBio	2017	2017-06-29	PMC5487734		10.1128/mBio.00916-17
24275851	Drug repositioning: an opportunity to develop novel treatments for Alzheimer's disease	Corbett A, Williams G, Ballard C.	Pharmaceuticals (Basel). 2013 Oct 11;6(10):1304-21. doi: 10.3390/ph6101304.	Corbett A	Pharmaceuticals (Basel)	2013	2013-11-27	PMC3817602		10.3390/ph6101304
32619176	Screening of Antibiotics Against β-amyloid as Anti-amyloidogenic Agents: A Drug Repurposing Approach	Alam J, Jaiswal V, Sharma L.	Curr Comput Aided Drug Des. 2021;17(5):647-654. doi: 10.2174/1573409916666200703171732.	Alam J	Curr Comput Aided Drug Des	2021	2020-07-04			10.2174/1573409916666200703171732
23307039	A review: treatment of Alzheimer's disease discovered in repurposed agents	Appleby BS, Nacopoulos D, Milano N, Zhong K, Cummings JL.	Dement Geriatr Cogn Disord. 2013;35(1-2):1-22. doi: 10.1159/000345791. Epub 2013 Jan 9.	Appleby BS	Dement Geriatr Cogn Disord	2013	2013-01-12			10.1159/000345791
30183790	Tacrine-deferiprone hybrids as multi-target-directed metal chelators against Alzheimer's disease: a two-in-one drug	Chand K, Rajeshwari, Candeias E, Cardoso SM, Chaves S, Santos MA.	Metallomics. 2018 Oct 17;10(10):1460-1475. doi: 10.1039/c8mt00143j. Epub 2018 Sep 5.	Chand K	Metallomics	2018	2018-09-06			10.1039/c8mt00143j
31981470	"Amyloid-beta accumulation cycle" as a prevention and/or therapy target for Alzheimer's disease	Rao CV, Asch AS, Carr DJJ, Yamada HY.	Aging Cell. 2020 Mar;19(3):e13109. doi: 10.1111/acel.13109. Epub 2020 Jan 25.	Rao CV	Aging Cell	2020	2020-01-26	PMC7059149		10.1111/acel.13109
31760822	Novel tacrine-benzofuran hybrids as potential multi-target drug candidates for the treatment of Alzheimer's Disease	Fancellu G, Chand K, Tomás D, Orlandini E, Piemontese L, Silva DF, Cardoso SM, Chaves S, Santos MA.	J Enzyme Inhib Med Chem. 2020 Dec;35(1):211-226. doi: 10.1080/14756366.2019.1689237.	Fancellu G	J Enzyme Inhib Med Chem	2020	2019-11-26	PMC7567501		10.1080/14756366.2019.1689237
28521682	Repurposing of Copper(II)-chelating Drugs for the Treatment of Neurodegenerative Diseases	Lanza V, Milardi D, Di Natale G, Pappalardo G.	Curr Med Chem. 2018 Feb 12;25(4):525-539. doi: 10.2174/0929867324666170518094404.	Lanza V	Curr Med Chem	2018	2017-05-20			10.2174/0929867324666170518094404
29421930	Research and development of anti-Alzheimer's disease drugs: an update from the perspective of technology flows	Liu K, Lin HH, Pi R, Mak S, Han Y, Hu Y.	Expert Opin Ther Pat. 2018 Apr;28(4):341-350. doi: 10.1080/13543776.2018.1439475. Epub 2018 Feb 13.	Liu K	Expert Opin Ther Pat	2018	2018-02-10			10.1080/13543776.2018.1439475
31634797	Unlocking the concealed targets using system biology mapping for Alzheimer's disease	Joshi P, Kawade V, Dhulap S, Goel M.	Pharmacol Rep. 2019 Dec;71(6):1104-1107. doi: 10.1016/j.pharep.2019.06.012. Epub 2019 Jun 29.	Joshi P	Pharmacol Rep	2019	2019-10-22			10.1016/j.pharep.2019.06.012
33614888	Rasagiline effects on glucose metabolism, cognition, and tau in Alzheimer's dementia	Matthews DC, Ritter A, Thomas RG, Andrews RD, Lukic AS, Revta C, Kinney JW, Tousi B, Leverenz JB, Fillit H, Zhong K, Feldman HH, Cummings J.	Alzheimers Dement (N Y). 2021 Feb 14;7(1):e12106. doi: 10.1002/trc2.12106. eCollection 2021.	Matthews DC	Alzheimers Dement (N Y)	2021	2021-02-22	PMC7882538		10.1002/trc2.12106
28473889	Filling the gap in CNS drug development: evaluation of the role of drug repurposing	Caban A, Pisarczyk K, Kopacz K, Kapuśniak A, Toumi M, Rémuzat C, Kornfeld A.	J Mark Access Health Policy. 2017 Apr 10;5(1):1299833. doi: 10.1080/20016689.2017.1299833. eCollection 2017.	Caban A	J Mark Access Health Policy	2017	2017-05-06	PMC5405562		10.1080/20016689.2017.1299833
33828235	Precision medicine for mood disorders: objective assessment, risk prediction, pharmacogenomics, and repurposed drugs	Le-Niculescu H, Roseberry K, Gill SS, Levey DF, Phalen PL, Mullen J, Williams A, Bhairo S, Voegtline T, Davis H, Shekhar A, Kurian SM, Niculescu AB.	Mol Psychiatry. 2021 Jul;26(7):2776-2804. doi: 10.1038/s41380-021-01061-w. Epub 2021 Apr 8.	Le-Niculescu H	Mol Psychiatry	2021	2021-04-08	PMC8505261		10.1038/s41380-021-01061-w
33320652	Combined Structure and Ligand-Based Design of Selective Acetylcholinesterase Inhibitors	Pérez-Sánchez H, den Haan H, Pérez-Garrido A, Peña-García J, Chakraborty S, Erdogan Orhan I, Senol Deniz FS, Villalgordo JM.	J Chem Inf Model. 2021 Jan 25;61(1):467-480. doi: 10.1021/acs.jcim.0c00463. Epub 2020 Dec 15.	Pérez-Sánchez H	J Chem Inf Model	2021	2020-12-15			10.1021/acs.jcim.0c00463
24931035	Repurposing diabetes drugs for brain insulin resistance in Alzheimer disease	Yarchoan M, Arnold SE.	Diabetes. 2014 Jul;63(7):2253-61. doi: 10.2337/db14-0287. Epub 2014 Jun 15.	Yarchoan M	Diabetes	2014	2014-06-17	PMC4066335		10.2337/db14-0287
32322468	Discovery of nitazoxanide-based derivatives as autophagy activators for the treatment of Alzheimer's disease	Li X, Lu J, Xu Y, Wang J, Qiu X, Fan L, Li B, Liu W, Mao F, Zhu J, Shen X, Li J.	Acta Pharm Sin B. 2020 Apr;10(4):646-666. doi: 10.1016/j.apsb.2019.07.006. Epub 2019 Jul 29.	Li X	Acta Pharm Sin B	2020	2020-04-24	PMC7161708		10.1016/j.apsb.2019.07.006
35510183	A hybrid approach unveils drug repurposing candidates targeting an Alzheimer pathophysiology mechanism	Lage-Rupprecht V, Schultz B, Dick J, Namysl M, Zaliani A, Gebel S, Pless O, Reinshagen J, Ellinger B, Ebeling C, Esser A, Jacobs M, Claussen C, Hofmann-Apitius M.	Patterns (N Y). 2022 Jan 26;3(3):100433. doi: 10.1016/j.patter.2021.100433. eCollection 2022 Mar 11.	Lage-Rupprecht V	Patterns (N Y)	2022	2022-05-05	PMC9058900		10.1016/j.patter.2021.100433
35572351	Endophenotype-based in silico network medicine discovery combined with insurance record data mining identifies sildenafil as a candidate drug for Alzheimer's disease	Fang J, Zhang P, Zhou Y, Chiang CW, Tan J, Hou Y, Stauffer S, Li L, Pieper AA, Cummings J, Cheng F.	Nat Aging. 2021 Dec;1(12):1175-1188. doi: 10.1038/s43587-021-00138-z. Epub 2021 Dec 6.	Fang J	Nat Aging	2021	2022-05-16	PMC9097949	NIHMS1792748	10.1038/s43587-021-00138-z
34987231	Genetics of common cerebral small vessel disease	Bordes C, Sargurupremraj M, Mishra A, Debette S.	Nat Rev Neurol. 2022 Feb;18(2):84-101. doi: 10.1038/s41582-021-00592-8. Epub 2022 Jan 5.	Bordes C	Nat Rev Neurol	2022	2022-01-06			10.1038/s41582-021-00592-8
32854860	Repurposing GLP1 agonists for neurodegenerative diseases	Markaki I, Winther K, Catrina SB, Svenningsson P.	Int Rev Neurobiol. 2020;155:91-112. doi: 10.1016/bs.irn.2020.02.007. Epub 2020 Aug 11.	Markaki I	Int Rev Neurobiol	2020	2020-08-29			10.1016/bs.irn.2020.02.007
23808708	Is a potential Alzheimer's therapy already in use for other conditions? Can medications for hypertension, diabetes and acne help with the symptoms?	Corbett A, Ballard C.	Expert Opin Investig Drugs. 2013 Aug;22(8):941-3. doi: 10.1517/13543784.2013.815723. Epub 2013 Jul 1.	Corbett A	Expert Opin Investig Drugs	2013	2013-07-02			10.1517/13543784.2013.815723
25709453	The emerging role of bexarotene in the treatment of Alzheimer's disease: current evidence	Tousi B.	Neuropsychiatr Dis Treat. 2015 Feb 5;11:311-5. doi: 10.2147/NDT.S61309. eCollection 2015.	Tousi B	Neuropsychiatr Dis Treat	2015	2015-02-25	PMC4327563		10.2147/NDT.S61309
33659028	Repositioning Drugs to the Mitochondrial Fusion Protein 2 by Three-Tunnel Deep Neural Network for Alzheimer's Disease	Wang X, Zhong Y, Ding M.	Front Genet. 2021 Feb 15;12:638330. doi: 10.3389/fgene.2021.638330. eCollection 2021.	Wang X	Front Genet	2021	2021-03-04	PMC7917248		10.3389/fgene.2021.638330
32933034	Marine Natural Products, Multitarget Therapy and Repurposed Agents in Alzheimer's Disease	Martins M, Silva R, M M Pinto M, Sousa E.	Pharmaceuticals (Basel). 2020 Sep 11;13(9):242. doi: 10.3390/ph13090242.	Martins M	Pharmaceuticals (Basel)	2020	2020-09-16	PMC7558913		10.3390/ph13090242
22741814	Clinical utility of neuroprotective agents in neurodegenerative diseases: current status of drug development for Alzheimer's, Parkinson's and Huntington's diseases, and amyotrophic lateral sclerosis	Dunkel P, Chai CL, Sperlágh B, Huleatt PB, Mátyus P.	Expert Opin Investig Drugs. 2012 Sep;21(9):1267-308. doi: 10.1517/13543784.2012.703178. Epub 2012 Jun 28.	Dunkel P	Expert Opin Investig Drugs	2012	2012-06-30			10.1517/13543784.2012.703178
34139302	Potential Repositioning of Anti-cancer EGFR Inhibitors in Alzheimer's Disease: Current Perspectives and Challenging Prospects	Mansour HM, Fawzy HM, El-Khatib AS, Khattab MM.	Neuroscience. 2021 Aug 10;469:191-196. doi: 10.1016/j.neuroscience.2021.06.013. Epub 2021 Jun 15.	Mansour HM	Neuroscience	2021	2021-06-17			10.1016/j.neuroscience.2021.06.013
34610141	The potential anti-amyloidogenic candidate, SPA1413, for Alzheimer's disease	An SSA, Shim KH, Kang S, Kim YK, Subedi L, Cho H, Hong SM, Tan MA, Jeon R, Chang KA, Kim SY.	Br J Pharmacol. 2022 Mar;179(5):1033-1048. doi: 10.1111/bph.15691. Epub 2021 Nov 4.	An SSA	Br J Pharmacol	2022	2021-10-05			10.1111/bph.15691
34717542	A drug repositioning algorithm based on a deep autoencoder and adaptive fusion	Chen P, Bao T, Yu X, Liu Z.	BMC Bioinformatics. 2021 Oct 30;22(1):532. doi: 10.1186/s12859-021-04406-y.	Chen P	BMC Bioinformatics	2021	2021-10-31	PMC8556784		10.1186/s12859-021-04406-y
30922126	Formulation and optimization of intranasal nanolipid carriers of pioglitazone for the repurposing in Alzheimer's disease using Box-Behnken design	Jojo GM, Kuppusamy G, De A, Karri VVSNR.	Drug Dev Ind Pharm. 2019 Jul;45(7):1061-1072. doi: 10.1080/03639045.2019.1593439. Epub 2019 Mar 28.	Jojo GM	Drug Dev Ind Pharm	2019	2019-03-30			10.1080/03639045.2019.1593439
33899637	Dementia with Lewy bodies: emerging drug targets and therapeutics	Pope ED, Cordes L, Shi J, Mari Z, Decourt B, Sabbagh MN.	Expert Opin Investig Drugs. 2021 Jun;30(6):603-609. doi: 10.1080/13543784.2021.1916913. Epub 2021 Apr 26.	Pope ED	Expert Opin Investig Drugs	2021	2021-04-26			10.1080/13543784.2021.1916913
33809987	Fenamates as Potential Therapeutics for Neurodegenerative Disorders	Hill J, Zawia NH.	Cells. 2021 Mar 22;10(3):702. doi: 10.3390/cells10030702.	Hill J	Cells	2021	2021-04-03	PMC8004804		10.3390/cells10030702
33854417	Repurposing Immunomodulatory Imide Drugs (IMiDs) in Neuropsychiatric and Neurodegenerative Disorders	Jung YJ, Tweedie D, Scerba MT, Kim DS, Palmas MF, Pisanu A, Carta AR, Greig NH.	Front Neurosci. 2021 Mar 29;15:656921. doi: 10.3389/fnins.2021.656921. eCollection 2021.	Jung YJ	Front Neurosci	2021	2021-04-15	PMC8039148		10.3389/fnins.2021.656921
33778168	Inhibition of aggregation of amyloid-β through covalent modification with benzylpenicillin; potential relevance to Alzheimer's disease	Alsalahat I, Al-Majdoub ZM, Taha MO, Barber J, Aojula H, Hodson N, Freeman S.	Biochem Biophys Rep. 2021 Mar 15;26:100943. doi: 10.1016/j.bbrep.2021.100943. eCollection 2021 Jul.	Alsalahat I	Biochem Biophys Rep	2021	2021-03-29	PMC7985693		10.1016/j.bbrep.2021.100943
33948878	Repurposing Vorinostat for the Treatment of Disorders Affecting Brain	Athira KV, Sadanandan P, Chakravarty S.	Neuromolecular Med. 2021 Dec;23(4):449-465. doi: 10.1007/s12017-021-08660-4. Epub 2021 May 4.	Athira KV	Neuromolecular Med	2021	2021-05-05			10.1007/s12017-021-08660-4
32171933	Donepezil-based hybrids as multifunctional anti-Alzheimer's disease chelating agents: Effect of positional isomerization	Costa M, Josselin R, Silva DF, Cardoso SM, May NV, Chaves S, Santos MA.	J Inorg Biochem. 2020 May;206:111039. doi: 10.1016/j.jinorgbio.2020.111039. Epub 2020 Feb 16.	Costa M	J Inorg Biochem	2020	2020-03-16			10.1016/j.jinorgbio.2020.111039
33476559	An Integrated Multi-omics Approach Identifies Therapeutic Potential for ATP6V1A in Late Onset Alzheimer's Disease	Byrns CN, Bonini NM.	Neuron. 2021 Jan 20;109(2):193-194. doi: 10.1016/j.neuron.2020.12.015.	Byrns CN	Neuron	2021	2021-01-21			10.1016/j.neuron.2020.12.015
34378011	Drug repositioning based on the heterogeneous information fusion graph convolutional network	Cai L, Lu C, Xu J, Meng Y, Wang P, Fu X, Zeng X, Su Y.	Brief Bioinform. 2021 Nov 5;22(6):bbab319. doi: 10.1093/bib/bbab319.	Cai L	Brief Bioinform	2021	2021-08-11			10.1093/bib/bbab319
27644990	Approved drugs are to be studied for use in Alzheimer's disease	Hopkins Tanne J.	BMJ. 2016 Sep 19;354:i5063. doi: 10.1136/bmj.i5063.	Hopkins Tanne J	BMJ	2016	2016-09-21			10.1136/bmj.i5063
33602068	Recent Multi-target Approaches on the Development of Anti- Alzheimer's Agents Integrating Metal Chelation Activity	Chaves S, Várnagy K, Santos MA.	Curr Med Chem. 2021;28(35):7247-7277. doi: 10.2174/0929867328666210218183032.	Chaves S	Curr Med Chem	2021	2021-02-19			10.2174/0929867328666210218183032
28503657	An amylin analog used as a challenge test for Alzheimer's disease	Zhu H, Stern RA, Tao Q, Bourlas A, Essis MD, Chivukula M, Rosenzweig J, Steenkamp D, Xia W, Mercier GA, Tripodis Y, Farlow M, Kowall N, Qiu WQ.	Alzheimers Dement (N Y). 2017 Jan;3(1):33-43. doi: 10.1016/j.trci.2016.12.002.	Zhu H	Alzheimers Dement (N Y)	2017	2017-05-16	PMC5424531	NIHMS856574	10.1016/j.trci.2016.12.002
31683487	Granisetron Alleviates Alzheimer's Disease Pathology in TgSwDI Mice Through Calmodulin-Dependent Protein Kinase II/cAMP-Response Element Binding Protein Pathway	Al Rihani SB, Lan RS, Kaddoumi A.	J Alzheimers Dis. 2019;72(4):1097-1117. doi: 10.3233/JAD-190849.	Al Rihani SB	J Alzheimers Dis	2019	2019-11-06	PMC7183768	NIHMS1581264	10.3233/JAD-190849
33523405	Memantine hydrochloride: a drug to be repurposed against Chikungunya virus?	Pereira AKDS, Santos IA, da Silva WW, Nogueira FAR, Bergamini FRG, Jardim ACG, Corbi PP.	Pharmacol Rep. 2021 Jun;73(3):954-961. doi: 10.1007/s43440-021-00216-4. Epub 2021 Feb 1.	Pereira AKDS	Pharmacol Rep	2021	2021-02-01	PMC7848042		10.1007/s43440-021-00216-4
29751602	Old Drugs as New Treatments for Neurodegenerative Diseases	Durães F, Pinto M, Sousa E.	Pharmaceuticals (Basel). 2018 May 11;11(2):44. doi: 10.3390/ph11020044.	Durães F	Pharmaceuticals (Basel)	2018	2018-05-13	PMC6027455		10.3390/ph11020044
31843941	High-dimensionality Data Analysis of Pharmacological Systems Associated with Complex Diseases	Hendrickx JO, van Gastel J, Leysen H, Martin B, Maudsley S.	Pharmacol Rev. 2020 Jan;72(1):191-217. doi: 10.1124/pr.119.017921.	Hendrickx JO	Pharmacol Rev	2020	2019-12-18			10.1124/pr.119.017921
31997821	Inhibition of BACE1, the β-secretase implicated in Alzheimer's disease, by a chondroitin sulfate extract from Sardina pilchardus	Mycroft-West CJ, Devlin AJ, Cooper LC, Procter P, Miller GJ, Fernig DG, Guerrini M, Guimond SE, Lima MA, Yates EA, Skidmore MA.	Neural Regen Res. 2020 Aug;15(8):1546-1553. doi: 10.4103/1673-5374.274341.	Mycroft-West CJ	Neural Regen Res	2020	2020-01-31	PMC7059579		10.4103/1673-5374.274341
30007162	Doxycycline counteracts neuroinflammation restoring memory in Alzheimer's disease mouse models	Balducci C, Santamaria G, La Vitola P, Brandi E, Grandi F, Viscomi AR, Beeg M, Gobbi M, Salmona M, Ottonello S, Forloni G.	Neurobiol Aging. 2018 Oct;70:128-139. doi: 10.1016/j.neurobiolaging.2018.06.002. Epub 2018 Jun 12.	Balducci C	Neurobiol Aging	2018	2018-07-15			10.1016/j.neurobiolaging.2018.06.002
34534764	Reversing pathology in a preclinical model of Alzheimer's disease by hacking cerebrovascular neoangiogenesis with advanced cancer therapeutics	Singh CSB, Choi KB, Munro L, Wang HY, Pfeifer CG, Jefferies WA.	EBioMedicine. 2021 Sep;71:103503. doi: 10.1016/j.ebiom.2021.103503. Epub 2021 Sep 15.	Singh CSB	EBioMedicine	2021	2021-09-17	PMC8449085		10.1016/j.ebiom.2021.103503
26389682	Progresses in treating agitation: a major clinical challenge in Alzheimer's disease	Panza F, Solfrizzi V, Seripa D, Imbimbo BP, Santamato A, Lozupone M, Prete C, Greco A, Pilotto A, Logroscino G.	Expert Opin Pharmacother. 2015;16(17):2581-8. doi: 10.1517/14656566.2015.1092520. Epub 2015 Sep 21.	Panza F	Expert Opin Pharmacother	2015	2015-09-22			10.1517/14656566.2015.1092520
34919634	A phase II study repurposing atomoxetine for neuroprotection in mild cognitive impairment	Levey AI, Qiu D, Zhao L, Hu WT, Duong DM, Higginbotham L, Dammer EB, Seyfried NT, Wingo TS, Hales CM, Gámez Tansey M, Goldstein DS, Abrol A, Calhoun VD, Goldstein FC, Hajjar I, Fagan AM, Galasko D, Edland SD, Hanfelt J, Lah JJ, Weinshenker D.	Brain. 2021 Dec 17:awab452. doi: 10.1093/brain/awab452. Online ahead of print.	Levey AI	Brain	2021	2021-12-17			10.1093/brain/awab452
31604413	NMDA Receptor Antagonists: Repositioning of Memantine as a Multitargeting Agent for Alzheimer's Therapy	Kabir MT, Sufian MA, Uddin MS, Begum MM, Akhter S, Islam A, Mathew B, Islam MS, Amran MS, Md Ashraf G.	Curr Pharm Des. 2019;25(33):3506-3518. doi: 10.2174/1381612825666191011102444.	Kabir MT	Curr Pharm Des	2019	2019-10-13			10.2174/1381612825666191011102444
34080526	Repositioning of antidiabetic drugs for Alzheimer's disease: possibility of Wnt signaling modulation by targeting LRP6 an in silico based study	Manandhar S, Priya K, Mehta CH, Nayak UY, Kabekkodu SP, Pai KSR.	J Biomol Struct Dyn. 2021 Jun 3:1-15. doi: 10.1080/07391102.2021.1930583. Online ahead of print.	Manandhar S	J Biomol Struct Dyn	2021	2021-06-03			10.1080/07391102.2021.1930583
34437506	Exposure to Environmental Arsenic and Emerging Risk of Alzheimer's Disease: Perspective Mechanisms, Management Strategy, and Future Directions	Rahman MA, Hannan MA, Uddin MJ, Rahman MS, Rashid MM, Kim B.	Toxics. 2021 Aug 14;9(8):188. doi: 10.3390/toxics9080188.	Rahman MA	Toxics	2021	2021-08-26	PMC8402411		10.3390/toxics9080188
35204697	DOTA: Deep Learning Optimal Transport Approach to Advance Drug Repositioning for Alzheimer's Disease	Chyr J, Gong H, Zhou X.	Biomolecules. 2022 Jan 24;12(2):196. doi: 10.3390/biom12020196.	Chyr J	Biomolecules	2022	2022-02-25	PMC8961573		10.3390/biom12020196
30452418	Aberrant Neuronal Cell Cycle Re-Entry: The Pathological Confluence of Alzheimer's Disease and Brain Insulin Resistance, and Its Relation to Cancer	Koseoglu MM, Norambuena A, Sharlow ER, Lazo JS, Bloom GS.	J Alzheimers Dis. 2019;67(1):1-11. doi: 10.3233/JAD-180874.	Koseoglu MM	J Alzheimers Dis	2019	2018-11-20	PMC8363205	NIHMS1730676	10.3233/JAD-180874
34445753	Combination of Drugs and Cell Transplantation: More Beneficial Stem Cell-Based Regenerative Therapies Targeting Neurological Disorders	Nishimura K, Takata K.	Int J Mol Sci. 2021 Aug 22;22(16):9047. doi: 10.3390/ijms22169047.	Nishimura K	Int J Mol Sci	2021	2021-08-27	PMC8396512		10.3390/ijms22169047
32909178	Repositioning medication for cardiovascular and cerebrovascular disease to delay the onset and prevent progression of Alzheimer's disease	Lee H, Kim E.	Arch Pharm Res. 2020 Sep;43(9):932-960. doi: 10.1007/s12272-020-01268-5. Epub 2020 Sep 9.	Lee H	Arch Pharm Res	2020	2020-09-10			10.1007/s12272-020-01268-5
29990107	Human Pathway-Based Disease Network	Yu L, Gao L.	IEEE/ACM Trans Comput Biol Bioinform. 2019 Jul-Aug;16(4):1240-1249. doi: 10.1109/TCBB.2017.2774802. Epub 2017 Nov 17.	Yu L	IEEE/ACM Trans Comput Biol Bioinform	2019	2018-07-11			10.1109/TCBB.2017.2774802
33447926	Memantine in neurological disorders - schizophrenia and depression	Czarnecka K, Chuchmacz J, Wójtowicz P, Szymański P.	J Mol Med (Berl). 2021 Mar;99(3):327-334. doi: 10.1007/s00109-020-01982-z. Epub 2021 Jan 14.	Czarnecka K	J Mol Med (Berl)	2021	2021-01-15	PMC7900025		10.1007/s00109-020-01982-z
33615172	Sulfonylurea Class of Antidiabetic Drugs Inhibit Acetylcholinesterase Activity: Unexplored Auxiliary Pharmacological Benefit toward Alzheimer's Disease	Baruah P, Das A, Paul D, Chakrabarty S, Aguan K, Mitra S.	ACS Pharmacol Transl Sci. 2021 Jan 6;4(1):193-205. doi: 10.1021/acsptsci.0c00168. eCollection 2021 Feb 12.	Baruah P	ACS Pharmacol Transl Sci	2021	2021-02-22	PMC7887854		10.1021/acsptsci.0c00168
33886614	High-throughput screening of the ReFRAME, Pandemic Box, and COVID Box drug repurposing libraries against SARS-CoV-2 nsp15 endoribonuclease to identify small-molecule inhibitors of viral activity	Choi R, Zhou M, Shek R, Wilson JW, Tillery L, Craig JK, Salukhe IA, Hickson SE, Kumar N, James RM, Buchko GW, Wu R, Huff S, Nguyen TT, Hurst BL, Cherry S, Barrett LK, Hyde JL, Van Voorhis WC.	PLoS One. 2021 Apr 22;16(4):e0250019. doi: 10.1371/journal.pone.0250019. eCollection 2021.	Choi R	PLoS One	2021	2021-04-22	PMC8062000		10.1371/journal.pone.0250019
30551512	The exploration of novel Alzheimer's therapeutic agents from the pool of FDA approved medicines using drug repositioning, enzyme inhibition and kinetic mechanism approaches	Hassan M, Raza H, Abbasi MA, Moustafa AA, Seo SY.	Biomed Pharmacother. 2019 Jan;109:2513-2526. doi: 10.1016/j.biopha.2018.11.115. Epub 2018 Dec 3.	Hassan M	Biomed Pharmacother	2019	2018-12-16			10.1016/j.biopha.2018.11.115
31543038	Reappraisal of FDA approved drugs against Alzheimer's disease based on differential gene expression and protein interaction network analysis: an in silico approach	G N S HS, Ganesan Rajalekshmi S, Murahari M, Burri RR.	J Biomol Struct Dyn. 2020 Aug;38(13):3972-3989. doi: 10.1080/07391102.2019.1671231. Epub 2019 Oct 14.	G N S HS	J Biomol Struct Dyn	2020	2019-09-24			10.1080/07391102.2019.1671231
33400519	The Antiviral Drug Tilorone Is a Potent and Selective Inhibitor of Acetylcholinesterase	Vignaux PA, Minerali E, Lane TR, Foil DH, Madrid PB, Puhl AC, Ekins S.	Chem Res Toxicol. 2021 May 17;34(5):1296-1307. doi: 10.1021/acs.chemrestox.0c00466. Epub 2021 Jan 5.	Vignaux PA	Chem Res Toxicol	2021	2021-01-05	PMC8215598	NIHMS1714391	10.1021/acs.chemrestox.0c00466
30971875	Repurposing of the β-Lactam Antibiotic, Ceftriaxone for Neurological Disorders: A Review	Yimer EM, Hishe HZ, Tuem KB.	Front Neurosci. 2019 Mar 26;13:236. doi: 10.3389/fnins.2019.00236. eCollection 2019.	Yimer EM	Front Neurosci	2019	2019-04-12	PMC6444273		10.3389/fnins.2019.00236
34035472	Identifying nootropic drug targets via large-scale cognitive GWAS and transcriptomics	Lam M, Chen CY, Ge T, Xia Y, Hill DW, Trampush JW, Yu J, Knowles E, Davies G, Stahl EA, Huckins L, Liewald DC, Djurovic S, Melle I, Christoforou A, Reinvang I, DeRosse P, Lundervold AJ, Steen VM, Espeseth T, Räikkönen K, Widen E, Palotie A, Eriksson JG, Giegling I, Konte B, Hartmann AM, Roussos P, Giakoumaki S, Burdick KE, Payton A, Ollier W, Chiba-Falek O, Koltai DC, Need AC, Cirulli ET, Voinesk…	Neuropsychopharmacology. 2021 Sep;46(10):1788-1801. doi: 10.1038/s41386-021-01023-4. Epub 2021 May 25.	Lam M	Neuropsychopharmacology	2021	2021-05-26	PMC8357785		10.1038/s41386-021-01023-4
33632781	Identification of Celecoxib-Targeted Proteins Using Label-Free Thermal Proteome Profiling on Rat Hippocampus	Gholizadeh E, Karbalaei R, Khaleghian A, Salimi M, Gilany K, Soliymani R, Tanoli Z, Rezadoost H, Baumann M, Jafari M, Tang J.	Mol Pharmacol. 2021 May;99(5):308-318. doi: 10.1124/molpharm.120.000210. Epub 2021 Feb 25.	Gholizadeh E	Mol Pharmacol	2021	2021-02-26			10.1124/molpharm.120.000210
33337360	Tetrahydrobiopterin Improves Recognition Memory in the Triple-Transgenic Mouse Model of Alzheimer's Disease, Without Altering Amyloid-β and Tau Pathologies	Fanet H, Tournissac M, Leclerc M, Caron V, Tremblay C, Vancassel S, Calon F.	J Alzheimers Dis. 2021;79(2):709-727. doi: 10.3233/JAD-200637.	Fanet H	J Alzheimers Dis	2021	2020-12-18	PMC7902975		10.3233/JAD-200637
29562545	The Coming of Age of the Angiotensin Hypothesis in Alzheimer's Disease: Progress Toward Disease Prevention and Treatment?	Kehoe PG.	J Alzheimers Dis. 2018;62(3):1443-1466. doi: 10.3233/JAD-171119.	Kehoe PG	J Alzheimers Dis	2018	2018-03-23	PMC5870007		10.3233/JAD-171119
31300053	Peptides as epigenetic modulators: therapeutic implications	Janssens Y, Wynendaele E, Vanden Berghe W, De Spiegeleer B.	Clin Epigenetics. 2019 Jul 12;11(1):101. doi: 10.1186/s13148-019-0700-7.	Janssens Y	Clin Epigenetics	2019	2019-07-14	PMC6624906		10.1186/s13148-019-0700-7
25362113	Neuroprotective effects of angiotensin receptor blockers	Villapol S, Saavedra JM.	Am J Hypertens. 2015 Mar;28(3):289-99. doi: 10.1093/ajh/hpu197. Epub 2014 Oct 31.	Villapol S	Am J Hypertens	2015	2014-11-02			10.1093/ajh/hpu197
33704677	Verapamil Prevents Development of Cognitive Impairment in an Aged Mouse Model of Sporadic Alzheimer's Disease	Ahmed HA, Ismael S, Mirzahosseini G, Ishrat T.	Mol Neurobiol. 2021 Jul;58(7):3374-3387. doi: 10.1007/s12035-021-02350-9. Epub 2021 Mar 11.	Ahmed HA	Mol Neurobiol	2021	2021-03-11			10.1007/s12035-021-02350-9
33383645	Model Amphipathic Peptide Coupled with Tacrine to Improve Its Antiproliferative Activity	Silva S, Alves C, Duarte D, Costa A, Sarmento B, Almeida AJ, Gomes P, Vale N.	Int J Mol Sci. 2020 Dec 29;22(1):242. doi: 10.3390/ijms22010242.	Silva S	Int J Mol Sci	2020	2021-01-01	PMC7795729		10.3390/ijms22010242
28715462	Cell specificity dictates similarities in gene expression in multiple sclerosis, Parkinson's disease, and Alzheimer's disease	Itoh Y, Voskuhl RR.	PLoS One. 2017 Jul 17;12(7):e0181349. doi: 10.1371/journal.pone.0181349. eCollection 2017.	Itoh Y	PLoS One	2017	2017-07-18	PMC5513529		10.1371/journal.pone.0181349
34658774	Neuroprotective Effects of Ceftriaxone Involve the Reduction of Aβ Burden and Neuroinflammatory Response in a Mouse Model of Alzheimer's Disease	Tikhonova MA, Amstislavskaya TG, Ho YJ, Akopyan AA, Tenditnik MV, Ovsyukova MV, Bashirzade AA, Dubrovina NI, Aftanas LI.	Front Neurosci. 2021 Sep 29;15:736786. doi: 10.3389/fnins.2021.736786. eCollection 2021.	Tikhonova MA	Front Neurosci	2021	2021-10-18	PMC8511453		10.3389/fnins.2021.736786
27715341	Modulation of GLP-1 signaling as a novel therapeutic approach in the treatment of Alzheimer's disease pathology	Tramutola A, Arena A, Cini C, Butterfield DA, Barone E.	Expert Rev Neurother. 2017 Jan;17(1):59-75. doi: 10.1080/14737175.2017.1246183. Epub 2016 Oct 20.	Tramutola A	Expert Rev Neurother	2017	2016-10-08			10.1080/14737175.2017.1246183
33796820	A deep learning framework for high-throughput mechanism-driven phenotype compound screening and its application to COVID-19 drug repurposing	Pham TH, Qiu Y, Zeng J, Xie L, Zhang P.	Nat Mach Intell. 2021 Mar;3(3):247-257. doi: 10.1038/s42256-020-00285-9. Epub 2021 Feb 1.	Pham TH	Nat Mach Intell	2021	2021-04-02	PMC8009091	NIHMS1655655	10.1038/s42256-020-00285-9
34909647	Perspective insights of repurposing the pleiotropic efficacy of statins in neurodegenerative disorders: An expository appraisal	Bhat A, Dalvi H, Jain H, Rangaraj N, Singh SB, Srivastava S.	Curr Res Pharmacol Drug Discov. 2020 Dec 31;2:100012. doi: 10.1016/j.crphar.2020.100012. eCollection 2021.	Bhat A	Curr Res Pharmacol Drug Discov	2020	2021-12-15	PMC8663947		10.1016/j.crphar.2020.100012
25682812	Approaches for discovering anti-prion compounds: lessons learned and challenges ahead	Bolognesi ML, Legname G.	Expert Opin Drug Discov. 2015 Apr;10(4):389-97. doi: 10.1517/17460441.2015.1016498. Epub 2015 Feb 15.	Bolognesi ML	Expert Opin Drug Discov	2015	2015-02-17			10.1517/17460441.2015.1016498
31300920	Diabetes Therapies for Dementia	Moran C, Callisaya ML, Srikanth V, Arvanitakis Z.	Curr Neurol Neurosci Rep. 2019 Jul 12;19(8):58. doi: 10.1007/s11910-019-0973-4.	Moran C	Curr Neurol Neurosci Rep	2019	2019-07-14			10.1007/s11910-019-0973-4
34328103	Effects of Naodesheng tablets on amyloid beta-induced dysfunction: A traditional Chinese herbal formula with novel therapeutic potential in Alzheimer's disease revealed by systems pharmacology	Zhang B, Zhao J, Guo P, Wang Z, Xu L, Liu A, Du G.	Biomed Pharmacother. 2021 Sep;141:111916. doi: 10.1016/j.biopha.2021.111916. Epub 2021 Jul 22.	Zhang B	Biomed Pharmacother	2021	2021-07-30			10.1016/j.biopha.2021.111916
29348604	Cromolyn Reduces Levels of the Alzheimer's Disease-Associated Amyloid β-Protein by Promoting Microglial Phagocytosis	Zhang C, Griciuc A, Hudry E, Wan Y, Quinti L, Ward J, Forte AM, Shen X, Ran C, Elmaleh DR, Tanzi RE.	Sci Rep. 2018 Jan 18;8(1):1144. doi: 10.1038/s41598-018-19641-2.	Zhang C	Sci Rep	2018	2018-01-20	PMC5773545		10.1038/s41598-018-19641-2
28635544	Heparin: new life for an old drug	Aláez-Versón CR, Lantero E, Fernàndez-Busquets X.	Nanomedicine (Lond). 2017 Jul;12(14):1727-1744. doi: 10.2217/nnm-2017-0127. Epub 2017 Jun 21.	Aláez-Versón CR	Nanomedicine (Lond)	2017	2017-06-22			10.2217/nnm-2017-0127
27774814	Recent progress in repositioning Alzheimer's disease drugs based on a multitarget strategy	Santos MA, Chand K, Chaves S.	Future Med Chem. 2016 Nov;8(17):2113-2142. doi: 10.4155/fmc-2016-0103. Epub 2016 Oct 24.	Santos MA	Future Med Chem	2016	2016-10-25			10.4155/fmc-2016-0103
30395851	New tricks for an old dog: A repurposing approach of apomorphine	Auffret M, Drapier S, Vérin M.	Eur J Pharmacol. 2019 Jan 15;843:66-79. doi: 10.1016/j.ejphar.2018.10.052. Epub 2018 Nov 2.	Auffret M	Eur J Pharmacol	2019	2018-11-06			10.1016/j.ejphar.2018.10.052
31358793	Dual dose-dependent effects of fingolimod in a mouse model of Alzheimer's disease	Carreras I, Aytan N, Choi JK, Tognoni CM, Kowall NW, Jenkins BG, Dedeoglu A.	Sci Rep. 2019 Jul 29;9(1):10972. doi: 10.1038/s41598-019-47287-1.	Carreras I	Sci Rep	2019	2019-07-31	PMC6662857		10.1038/s41598-019-47287-1
33828477	Doxycycline Interferes With Tau Aggregation and Reduces Its Neuronal Toxicity	Medina L, González-Lizárraga F, Dominguez-Meijide A, Ploper D, Parrales V, Sequeira S, Cima-Omori MS, Zweckstetter M, Del Bel E, Michel PP, Outeiro TF, Raisman-Vozari R, Chehín R, Socias SB.	Front Aging Neurosci. 2021 Mar 22;13:635760. doi: 10.3389/fnagi.2021.635760. eCollection 2021.	Medina L	Front Aging Neurosci	2021	2021-04-08	PMC8020845		10.3389/fnagi.2021.635760
27072703	Hsp90 Inhibitors in Parasitic Nematodes: Prospects and Challenges	Devaney E, Gillan V.	Curr Top Med Chem. 2016;16(25):2805-11. doi: 10.2174/1568026616666160413140502.	Devaney E	Curr Top Med Chem	2016	2016-04-14			10.2174/1568026616666160413140502
33917161	Multi-Layer Picture of Neurodegenerative Diseases: Lessons from the Use of Big Data through Artificial Intelligence	Termine A, Fabrizio C, Strafella C, Caputo V, Petrosini L, Caltagirone C, Giardina E, Cascella R.	J Pers Med. 2021 Apr 7;11(4):280. doi: 10.3390/jpm11040280.	Termine A	J Pers Med	2021	2021-04-30	PMC8067806		10.3390/jpm11040280
31025031	Mining Clinical Case Reports to Identify New Lines of Investigation in Alzheimer's Disease: The Curious Case of DNase I	Smalheiser NR.	J Alzheimers Dis Rep. 2019 Mar 22;3(1):71-76. doi: 10.3233/ADR-190100.	Smalheiser NR	J Alzheimers Dis Rep	2019	2019-04-27	PMC6481472		10.3233/ADR-190100
29086699	Combining in vitro and in silico Approaches to Find New Candidate Drugs Targeting the Pathological Proteins Related to the Alzheimer's Disease	Li H, Wang X, Yu H, Zhu J, Jin H, Wang A, Yang Z.	Curr Neuropharmacol. 2018;16(6):758-768. doi: 10.2174/1570159X15666171030142108.	Li H	Curr Neuropharmacol	2018	2017-11-01	PMC6080099		10.2174/1570159X15666171030142108
31368868	Inhibitory Mechanism of An Anticancer Drug, Bexarotene Against Amyloid β Peptide Aggregation: Repurposing Via Neuroinformatics Approach	Bibi N, Rizvi SMD, Batool A, Kamal MA.	Curr Pharm Des. 2019;25(27):2989-2995. doi: 10.2174/1381612825666190801123235.	Bibi N	Curr Pharm Des	2019	2019-08-02			10.2174/1381612825666190801123235
31498121	A Randomized, Double-Blind, Placebo-Controlled Study to Evaluate the Efficacy of Teprenone in Patients with Alzheimer's Disease	Yokoyama S, Yoshinaga T, Matsuzaki J, Suzuki H.	J Alzheimers Dis. 2019;71(4):1187-1199. doi: 10.3233/JAD-190305.	Yokoyama S	J Alzheimers Dis	2019	2019-09-10			10.3233/JAD-190305
30710675	Multi-faceted therapeutic strategy for treatment of Alzheimer's disease by concurrent administration of etodolac and α-tocopherol	Elfakhri KH, Abdallah IM, Brannen AD, Kaddoumi A.	Neurobiol Dis. 2019 May;125:123-134. doi: 10.1016/j.nbd.2019.01.020. Epub 2019 Jan 30.	Elfakhri KH	Neurobiol Dis	2019	2019-02-03	PMC6401224	NIHMS1520768	10.1016/j.nbd.2019.01.020
35195784	Guanabenz mitigates the neuropathological alterations and cell death in Alzheimer's disease	Singh A, Gupta P, Tiwari S, Mishra A, Singh S.	Cell Tissue Res. 2022 May;388(2):239-258. doi: 10.1007/s00441-021-03570-0. Epub 2022 Feb 23.	Singh A	Cell Tissue Res	2022	2022-02-23			10.1007/s00441-021-03570-0
27151405	DrugGenEx-Net: a novel computational platform for systems pharmacology and gene expression-based drug repurposing	Issa NT, Kruger J, Wathieu H, Raja R, Byers SW, Dakshanamurthy S.	BMC Bioinformatics. 2016 May 5;17(1):202. doi: 10.1186/s12859-016-1065-y.	Issa NT	BMC Bioinformatics	2016	2016-05-07	PMC4857427		10.1186/s12859-016-1065-y
34857772	Mapping the serum proteome to neurological diseases using whole genome sequencing	Png G, Barysenka A, Repetto L, Navarro P, Shen X, Pietzner M, Wheeler E, Wareham NJ, Langenberg C, Tsafantakis E, Karaleftheri M, Dedoussis G, Mälarstig A, Wilson JF, Gilly A, Zeggini E.	Nat Commun. 2021 Dec 2;12(1):7042. doi: 10.1038/s41467-021-27387-1.	Png G	Nat Commun	2021	2021-12-03	PMC8640022		10.1038/s41467-021-27387-1
35276497	Role of HSV-1 in Alzheimer's disease pathogenesis: A challenge for novel preventive/therapeutic strategies	Protto V, Marcocci ME, Miteva MT, Piacentini R, Li Puma DD, Grassi C, Palamara AT, De Chiara G.	Curr Opin Pharmacol. 2022 Apr;63:102200. doi: 10.1016/j.coph.2022.102200. Epub 2022 Mar 8.	Protto V	Curr Opin Pharmacol	2022	2022-03-11			10.1016/j.coph.2022.102200
35115528	Deep phenotyping of Alzheimer's disease leveraging electronic medical records identifies sex-specific clinical associations	Tang AS, Oskotsky T, Havaldar S, Mantyh WG, Bicak M, Solsberg CW, Woldemariam S, Zeng B, Hu Z, Oskotsky B, Dubal D, Allen IE, Glicksberg BS, Sirota M.	Nat Commun. 2022 Feb 3;13(1):675. doi: 10.1038/s41467-022-28273-0.	Tang AS	Nat Commun	2022	2022-02-04	PMC8814236		10.1038/s41467-022-28273-0
31534955	Predicting Drug-Disease Associations via Using Gaussian Interaction Profile and Kernel-Based Autoencoder	Jiang HJ, Huang YA, You ZH.	Biomed Res Int. 2019 Aug 27;2019:2426958. doi: 10.1155/2019/2426958. eCollection 2019.	Jiang HJ	Biomed Res Int	2019	2019-09-20	PMC6732622		10.1155/2019/2426958
34095441	Conversion from cilostazol to OPC-13015 linked to mitigation of cognitive impairment	Saito S, Shinmyozu K, Kawakami D, Yamauchi M, Ikeda S, Hattori Y, Yamamoto R, Hayakawa N, Ihara M.	Alzheimers Dement (N Y). 2021 May 27;7(1):e12182. doi: 10.1002/trc2.12182. eCollection 2021.	Saito S	Alzheimers Dement (N Y)	2021	2021-06-07	PMC8158162		10.1002/trc2.12182
32834116	Repurposing of existing FDA approved drugs for Neprilysin inhibition: An in-silico study	Sankhe R, Rathi E, Manandhar S, Kumar A, Pai SRK, Kini SG, Kishore A.	J Mol Struct. 2021 Jan 15;1224:129073. doi: 10.1016/j.molstruc.2020.129073. Epub 2020 Aug 12.	Sankhe R	J Mol Struct	2021	2020-08-25	PMC7422802		10.1016/j.molstruc.2020.129073
26231940	Nicotinic ligands as multifunctional agents for the treatment of neuropsychiatric disorders	Terry AV Jr, Callahan PM, Hernandez CM.	Biochem Pharmacol. 2015 Oct 15;97(4):388-398. doi: 10.1016/j.bcp.2015.07.027. Epub 2015 Jul 29.	Terry AV Jr	Biochem Pharmacol	2015	2015-08-02	PMC4752163	NIHMS711599	10.1016/j.bcp.2015.07.027
35563011	The Influence of Selected Antipsychotic Drugs on Biochemical Aspects of Alzheimer's Disease	Podsiedlik M, Markowicz-Piasecka M, Sikora J.	Int J Mol Sci. 2022 Apr 21;23(9):4621. doi: 10.3390/ijms23094621.	Podsiedlik M	Int J Mol Sci	2022	2022-05-14	PMC9102502		10.3390/ijms23094621
32743586	A deep learning framework for high-throughput mechanism-driven phenotype compound screening	Pham TH, Qiu Y, Zeng J, Xie L, Zhang P.	bioRxiv. 2020 Jul 20:2020.07.19.211235. doi: 10.1101/2020.07.19.211235. Preprint.	Pham TH	bioRxiv	2020	2020-08-04	PMC7386506		10.1101/2020.07.19.211235
27009601	Repurposing the NRF2 Activator Dimethyl Fumarate as Therapy Against Synucleinopathy in Parkinson's Disease	Lastres-Becker I, García-Yagüe AJ, Scannevin RH, Casarejos MJ, Kügler S, Rábano A, Cuadrado A.	Antioxid Redox Signal. 2016 Jul 10;25(2):61-77. doi: 10.1089/ars.2015.6549. Epub 2016 Apr 27.	Lastres-Becker I	Antioxid Redox Signal	2016	2016-03-25	PMC4943471		10.1089/ars.2015.6549
25125473	Phosphodiesterase inhibition in cognitive decline	García-Barroso C, Ugarte A, Martínez M, Rico AJ, Lanciego JL, Franco R, Oyarzabal J, Cuadrado-Tejedor M, García-Osta A.	J Alzheimers Dis. 2014;42 Suppl 4:S561-73. doi: 10.3233/JAD-141341.	García-Barroso C	J Alzheimers Dis	2014	2014-08-16			10.3233/JAD-141341
30311144	PDE3 Inhibitors Repurposed as Treatments for Age-Related Cognitive Impairment	Yanai S, Endo S.	Mol Neurobiol. 2019 Jun;56(6):4306-4316. doi: 10.1007/s12035-018-1374-4. Epub 2018 Oct 11.	Yanai S	Mol Neurobiol	2019	2018-10-13			10.1007/s12035-018-1374-4
24502586	Repackaging FDA-approved drugs for degenerative diseases: promises and challenges	Cummings JL, Zhong K.	Expert Rev Clin Pharmacol. 2014 Mar;7(2):161-5. doi: 10.1586/17512433.2014.884923. Epub 2014 Feb 6.	Cummings JL	Expert Rev Clin Pharmacol	2014	2014-02-08			10.1586/17512433.2014.884923
29068218	Design, Synthesis, and Biological Evaluation of Orally Available First-Generation Dual-Target Selective Inhibitors of Acetylcholinesterase (AChE) and Phosphodiesterase 5 (PDE5) for the Treatment of Alzheimer's Disease	Mao F, Wang H, Ni W, Zheng X, Wang M, Bao K, Ling D, Li X, Xu Y, Zhang H, Li J.	ACS Chem Neurosci. 2018 Feb 21;9(2):328-345. doi: 10.1021/acschemneuro.7b00345. Epub 2017 Nov 9.	Mao F	ACS Chem Neurosci	2018	2017-10-26			10.1021/acschemneuro.7b00345
35550850	Trained immunity in viral infections, Alzheimer's disease and multiple sclerosis: A convergence in type I interferon signalling and IFNβ-1a	Vavougios GD, Mavridis T, Artemiadis A, Krogfelt KA, Hadjigeorgiou G.	Biochim Biophys Acta Mol Basis Dis. 2022 May 10;1868(9):166430. doi: 10.1016/j.bbadis.2022.166430. Online ahead of print.	Vavougios GD	Biochim Biophys Acta Mol Basis Dis	2022	2022-05-13			10.1016/j.bbadis.2022.166430
30157623	Interactions of Selective Serotonin Reuptake Inhibitors with β-Amyloid	Tin G, Mohamed T, Shakeri A, Pham AT, Rao PPN.	ACS Chem Neurosci. 2019 Jan 16;10(1):226-234. doi: 10.1021/acschemneuro.8b00160. Epub 2018 Sep 11.	Tin G	ACS Chem Neurosci	2019	2018-08-31			10.1021/acschemneuro.8b00160
35131314	Repositioning and development of new treatments for neurodegenerative diseases: Focus on neuroinflammation	Arbo BD, Schimith LE, Goulart Dos Santos M, Hort MA.	Eur J Pharmacol. 2022 Mar 15;919:174800. doi: 10.1016/j.ejphar.2022.174800. Epub 2022 Feb 5.	Arbo BD	Eur J Pharmacol	2022	2022-02-08			10.1016/j.ejphar.2022.174800
34131148	Genome-wide discovery of hidden genes mediating known drug-disease association using KDDANet	Yu H, Lu L, Chen M, Li C, Zhang J.	NPJ Genom Med. 2021 Jun 15;6(1):50. doi: 10.1038/s41525-021-00216-6.	Yu H	NPJ Genom Med	2021	2021-06-16	PMC8206141		10.1038/s41525-021-00216-6
33081685	Antitumorigenic Effect of Memantine via Interfering Glutamate Metabolism in Mouse 4T1 Breast Tumor Model	Albayrak G, Korkmaz FD, Bali EB, Bagriacik EU.	Anticancer Agents Med Chem. 2021;21(12):1575-1580. doi: 10.2174/0929867327666201020155733.	Albayrak G	Anticancer Agents Med Chem	2021	2020-10-21			10.2174/0929867327666201020155733
35309456	Elucidating the Interactions of Fluoxetine with Human Transferrin Employing Spectroscopic, Calorimetric, and In Silico Approaches: Implications of a Potent Alzheimer's Drug	Khan MS, Shahwan M, Shamsi A, Alhumaydhi FA, Alsagaby SA, Al Abdulmonem W, Abdullaev B, Yadav DK.	ACS Omega. 2022 Mar 2;7(10):9015-9023. doi: 10.1021/acsomega.2c00182. eCollection 2022 Mar 15.	Khan MS	ACS Omega	2022	2022-03-21	PMC8928501		10.1021/acsomega.2c00182
33869067	Nanomaterial Complexes Enriched With Natural Compounds Used in Cancer Therapies: A Perspective for Clinical Application	Saavedra-Leos MZ, Jordan-Alejandre E, López-Camarillo C, Pozos-Guillen A, Leyva-Porras C, Silva-Cázares MB.	Front Oncol. 2021 Apr 1;11:664380. doi: 10.3389/fonc.2021.664380. eCollection 2021.	Saavedra-Leos MZ	Front Oncol	2021	2021-04-19	PMC8047625		10.3389/fonc.2021.664380
34603007	Innate Immune System Activation and Neuroinflammation in Down Syndrome and Neurodegeneration: Therapeutic Targets or Partners?	Ahmed MM, Johnson NR, Boyd TD, Coughlan C, Chial HJ, Potter H.	Front Aging Neurosci. 2021 Sep 16;13:718426. doi: 10.3389/fnagi.2021.718426. eCollection 2021.	Ahmed MM	Front Aging Neurosci	2021	2021-10-04	PMC8481947		10.3389/fnagi.2021.718426
28542505	AlzhCPI: A knowledge base for predicting chemical-protein interactions towards Alzheimer's disease	Fang J, Wang L, Li Y, Lian W, Pang X, Wang H, Yuan D, Wang Q, Liu AL, Du GH.	PLoS One. 2017 May 25;12(5):e0178347. doi: 10.1371/journal.pone.0178347. eCollection 2017.	Fang J	PLoS One	2017	2017-05-26	PMC5460905		10.1371/journal.pone.0178347
30234434	Application of molecular framework-based data-mining method in the search for beta-secretase 1 inhibitors through drug repurposing	Ion GND, Mihai DP, Lupascu G, Nitulescu GM.	J Biomol Struct Dyn. 2019 Sep;37(14):3674-3685. doi: 10.1080/07391102.2018.1526115. Epub 2018 Nov 13.	Ion GND	J Biomol Struct Dyn	2019	2018-09-21			10.1080/07391102.2018.1526115
26742522	Clozapine Improves Memory Impairment and Reduces Aβ Level in the Tg-APPswe/PS1dE9 Mouse Model of Alzheimer's Disease	Choi Y, Jeong HJ, Liu QF, Oh ST, Koo BS, Kim Y, Chung IW, Kim YS, Jeon S.	Mol Neurobiol. 2017 Jan;54(1):450-460. doi: 10.1007/s12035-015-9636-x. Epub 2016 Jan 7.	Choi Y	Mol Neurobiol	2017	2016-01-09			10.1007/s12035-015-9636-x
33324805	Structure-Based Scaffold Repurposing toward the Discovery of Novel Cholinesterase Inhibitors	Dighe SN, Tippana M, van Akker S, Collet TA.	ACS Omega. 2020 Nov 24;5(48):30971-30979. doi: 10.1021/acsomega.0c03848. eCollection 2020 Dec 8.	Dighe SN	ACS Omega	2020	2020-12-16	PMC7726787		10.1021/acsomega.0c03848
34959313	Investigating Structural Property Relationships to Enable Repurposing of Pharmaceuticals as Zinc Ionophores	Kavanagh O, Elmes R, O'Sullivan F, Farragher J, Robinson S, Walker G.	Pharmaceutics. 2021 Nov 29;13(12):2032. doi: 10.3390/pharmaceutics13122032.	Kavanagh O	Pharmaceutics	2021	2021-12-28	PMC8704213		10.3390/pharmaceutics13122032
33877683	Dantrolene repurposed to treat sepsis or septic shock and COVID-19 patients	Wei H, Liang G, Vera RM.	Eur Rev Med Pharmacol Sci. 2021 Apr;25(7):3136-3144. doi: 10.26355/eurrev_202104_25569.	Wei H	Eur Rev Med Pharmacol Sci	2021	2021-04-20	PMC8612127	NIHMS1757096	10.26355/eurrev_202104_25569
32188750	Multiple Bactericidal Mechanisms of the Zinc Ionophore PBT2	Harbison-Price N, Ferguson SA, Heikal A, Taiaroa G, Hards K, Nakatani Y, Rennison D, Brimble MA, El-Deeb IM, Bohlmann L, McDevitt CA, von Itzstein M, Walker MJ, Cook GM.	mSphere. 2020 Mar 18;5(2):e00157-20. doi: 10.1128/mSphere.00157-20.	Harbison-Price N	mSphere	2020	2020-03-20	PMC7082140		10.1128/mSphere.00157-20
34233173	Dimethyl fumarate does not mitigate cognitive decline and β-amyloidosis in female APPPS1 mice	Möhle L, Brackhan M, Bascuñana P, Pahnke J.	Brain Res. 2021 Oct 1;1768:147579. doi: 10.1016/j.brainres.2021.147579. Epub 2021 Jul 4.	Möhle L	Brain Res	2021	2021-07-07			10.1016/j.brainres.2021.147579
32401481	Therapeutic Potential of Phosphodiesterase Inhibitors against Neurodegeneration: The Perspective of the Medicinal Chemist	Ribaudo G, Ongaro A, Zagotto G, Memo M, Gianoncelli A.	ACS Chem Neurosci. 2020 Jun 17;11(12):1726-1739. doi: 10.1021/acschemneuro.0c00244. Epub 2020 May 28.	Ribaudo G	ACS Chem Neurosci	2020	2020-05-14	PMC8007108		10.1021/acschemneuro.0c00244
32097451	Commentary: Using human genetics to guide the repurposing of medicines	Bovijn J, Censin JC, Lindgren CM, Holmes MV.	Int J Epidemiol. 2020 Aug 1;49(4):1140-1146. doi: 10.1093/ije/dyaa015.	Bovijn J	Int J Epidemiol	2020	2020-02-26	PMC7660148		10.1093/ije/dyaa015
32886489	Gabapentin Inhibits Multiple Steps in the Amyloid Beta Toxicity Cascade	González-Sanmiguel J, Burgos CF, Bascuñán D, Fernández-Pérez EJ, Riffo-Lepe N, Boopathi S, Fernández-Pérez A, Bobadilla-Azócar C, González W, Figueroa M, Vicente B, Aguayo LG.	ACS Chem Neurosci. 2020 Oct 7;11(19):3064-3076. doi: 10.1021/acschemneuro.0c00414. Epub 2020 Sep 22.	González-Sanmiguel J	ACS Chem Neurosci	2020	2020-09-04			10.1021/acschemneuro.0c00414
28711402	Beneficial effects of Angiotensin II receptor blockers in brain disorders	Saavedra JM.	Pharmacol Res. 2017 Nov;125(Pt A):91-103. doi: 10.1016/j.phrs.2017.06.017. Epub 2017 Jul 12.	Saavedra JM	Pharmacol Res	2017	2017-07-17			10.1016/j.phrs.2017.06.017
35227886	How nano-engineered delivery systems can help marketed and repurposed drugs in Alzheimer's disease treatment?	Séguy L, Groo AC, Malzert-Fréon A.	Drug Discov Today. 2022 Feb 25:S1359-6446(22)00080-0. doi: 10.1016/j.drudis.2022.02.022. Online ahead of print.	Séguy L	Drug Discov Today	2022	2022-03-01			10.1016/j.drudis.2022.02.022
33341877	PharmKG: a dedicated knowledge graph benchmark for bomedical data mining	Zheng S, Rao J, Song Y, Zhang J, Xiao X, Fang EF, Yang Y, Niu Z.	Brief Bioinform. 2021 Jul 20;22(4):bbaa344. doi: 10.1093/bib/bbaa344.	Zheng S	Brief Bioinform	2021	2020-12-20			10.1093/bib/bbaa344
26567970	The FDA-approved natural product dihydroergocristine reduces the production of the Alzheimer's disease amyloid-β peptides	Lei X, Yu J, Niu Q, Liu J, Fraering PC, Wu F.	Sci Rep. 2015 Nov 16;5:16541. doi: 10.1038/srep16541.	Lei X	Sci Rep	2015	2015-11-17	PMC4644980		10.1038/srep16541
31336912	The Nervous System Relevance of the Calcium Sensing Receptor in Health and Disease	Giudice ML, Mihalik B, Dinnyés A, Kobolák J.	Molecules. 2019 Jul 12;24(14):2546. doi: 10.3390/molecules24142546.	Giudice ML	Molecules	2019	2019-07-25	PMC6680999		10.3390/molecules24142546
34939537	Role of Fyn Kinase Inhibitors in Switching Neuroinflammatory Pathways	Marotta G, Basagni F, Rosini M, Minarini A.	Curr Med Chem. 2021 Dec 21. doi: 10.2174/0929867329666211221153719. Online ahead of print.	Marotta G	Curr Med Chem	2021	2021-12-23			10.2174/0929867329666211221153719
25356422	Overcoming obstacles to repurposing for neurodegenerative disease	Shineman DW, Alam J, Anderson M, Black SE, Carman AJ, Cummings JL, Dacks PA, Dudley JT, Frail DE, Green A, Lane RF, Lappin D, Simuni T, Stefanacci RG, Sherer T, Fillit HM.	Ann Clin Transl Neurol. 2014 Jul;1(7):512-8. doi: 10.1002/acn3.76. Epub 2014 Jun 24.	Shineman DW	Ann Clin Transl Neurol	2014	2014-10-31	PMC4184781		10.1002/acn3.76
28035920	Using Drugs as Molecular Probes: A Computational Chemical Biology Approach in Neurodegenerative Diseases	Emon MA, Kodamullil AT, Karki R, Younesi E, Hofmann-Apitius M.	J Alzheimers Dis. 2017;56(2):677-686. doi: 10.3233/JAD-160222.	Emon MA	J Alzheimers Dis	2017	2016-12-31	PMC5271458		10.3233/JAD-160222
29551332	Intelligent and effective informatic deconvolution of "Big Data" and its future impact on the quantitative nature of neurodegenerative disease therapy	Maudsley S, Devanarayan V, Martin B, Geerts H; Brain Health Modeling Initiative (BHMI).	Alzheimers Dement. 2018 Jul;14(7):961-975. doi: 10.1016/j.jalz.2018.01.014. Epub 2018 Mar 15.	Maudsley S	Alzheimers Dement	2018	2018-03-20			10.1016/j.jalz.2018.01.014
35554038	Defining Dopamine-Mediated Changes in NLRP1, NLRC5, NLRC4, and AIM2 Inflammasomes in Human Myeloid Cells	Canagarajah J, Matt S, Gaskill PJ.	FASEB J. 2022 May;36 Suppl 1. doi: 10.1096/fasebj.2022.36.S1.R3191.	Canagarajah J	FASEB J	2022	2022-05-13			10.1096/fasebj.2022.36.S1.R3191
34983978	Psychosis in Alzheimer disease - mechanisms, genetics and therapeutic opportunities	Ismail Z, Creese B, Aarsland D, Kales HC, Lyketsos CG, Sweet RA, Ballard C.	Nat Rev Neurol. 2022 Mar;18(3):131-144. doi: 10.1038/s41582-021-00597-3. Epub 2022 Jan 4.	Ismail Z	Nat Rev Neurol	2022	2022-01-05	PMC9074132	NIHMS1802205	10.1038/s41582-021-00597-3
35050595	Auxiliary Therapeutic Role of Cholinergic Agents: Mechanistic Insights into the Antioxidant Behavior of Alzheimer's Disease Drugs	Phanrang PT, Baruah P, Chandra AK, Mitra S.	J Phys Chem A. 2022 Feb 3;126(4):546-556. doi: 10.1021/acs.jpca.1c09146. Epub 2022 Jan 20.	Phanrang PT	J Phys Chem A	2022	2022-01-20			10.1021/acs.jpca.1c09146
33798505	The antibiotic doxycycline mimics the NGF signaling in PC12 cells: A relevant mechanism for neuroprotection	Amaral LD, Santos NAGD, Sisti FM, Del Bel E, Santos ACD.	Chem Biol Interact. 2021 May 25;341:109454. doi: 10.1016/j.cbi.2021.109454. Epub 2021 Mar 30.	Amaral LD	Chem Biol Interact	2021	2021-04-02			10.1016/j.cbi.2021.109454
34278954	Computational studies on phylogeny and drug designing using molecular simulations for COVID-19	Nabi F, Ahmad O, Khan YA, Nabi A, Md Amiruddin H, Abul Qais F, Masroor A, Hisamuddin M, Uversky VN, Khan RH.	J Biomol Struct Dyn. 2021 Jul 19:1-10. doi: 10.1080/07391102.2021.1947895. Online ahead of print.	Nabi F	J Biomol Struct Dyn	2021	2021-07-19			10.1080/07391102.2021.1947895
34047061	Synthesis and Biological Evaluation of Dantrolene-Like Hydrazide and Hydrazone Analogues as Multitarget Agents for Neurodegenerative Diseases	Bolognino I, Giangregorio N, Tonazzi A, Martínez AL, Altomare CD, Loza MI, Sablone S, Cellamare S, Catto M.	ChemMedChem. 2021 Sep 16;16(18):2807-2816. doi: 10.1002/cmdc.202100209. Epub 2021 Jun 22.	Bolognino I	ChemMedChem	2021	2021-05-28	PMC8518391		10.1002/cmdc.202100209
34445767	Suppression of LPS-Induced Inflammation and Cell Migration by Azelastine through Inhibition of JNK/NF-κB Pathway in BV2 Microglial Cells	Nguyen PL, Bui BP, Duong MTH, Lee K, Ahn HC, Cho J.	Int J Mol Sci. 2021 Aug 23;22(16):9061. doi: 10.3390/ijms22169061.	Nguyen PL	Int J Mol Sci	2021	2021-08-27	PMC8396433		10.3390/ijms22169061
24564976	Computational drug repositioning through heterogeneous network clustering	Wu C, Gudivada RC, Aronow BJ, Jegga AG.	BMC Syst Biol. 2013;7 Suppl 5(Suppl 5):S6. doi: 10.1186/1752-0509-7-S5-S6. Epub 2013 Dec 9.	Wu C	BMC Syst Biol	2013	2014-02-26	PMC4029299		10.1186/1752-0509-7-S5-S6
31972182	Natural products-based polypharmacological modulation of the peripheral immune system for the treatment of neuropsychiatric disorders	Mok SW, Wong VK, Lo HH, de Seabra Rodrigues Dias IR, Leung EL, Law BY, Liu L.	Pharmacol Ther. 2020 Apr;208:107480. doi: 10.1016/j.pharmthera.2020.107480. Epub 2020 Jan 21.	Mok SW	Pharmacol Ther	2020	2020-01-24			10.1016/j.pharmthera.2020.107480
35465231	Chemical-induced gene expression ranking and its application to pancreatic cancer drug repurposing	Pham TH, Qiu Y, Liu J, Zimmer S, O'Neill E, Xie L, Zhang P.	Patterns (N Y). 2022 Feb 4;3(4):100441. doi: 10.1016/j.patter.2022.100441. eCollection 2022 Apr 8.	Pham TH	Patterns (N Y)	2022	2022-04-25	PMC9023899		10.1016/j.patter.2022.100441
30521994	A multifunctional compound ebselen reverses memory impairment, apoptosis and oxidative stress in a mouse model of sporadic Alzheimer's disease	Martini F, Rosa SG, Klann IP, Fulco BCW, Carvalho FB, Rahmeier FL, Fernandes MC, Nogueira CW.	J Psychiatr Res. 2019 Feb;109:107-117. doi: 10.1016/j.jpsychires.2018.11.021. Epub 2018 Nov 27.	Martini F	J Psychiatr Res	2019	2018-12-07			10.1016/j.jpsychires.2018.11.021
27781960	Angiotensin Mediated Oxidative Stress and Neuroprotective Potential of Antioxidants and AT1 Receptor Blockers	Prusty SK, Sahu PK, Subudhi BB.	Mini Rev Med Chem. 2017;17(6):518-528. doi: 10.2174/1389557516666161025094539.	Prusty SK	Mini Rev Med Chem	2017	2016-10-27			10.2174/1389557516666161025094539
25141174	Molecular investigations of protriptyline as a multi-target directed ligand in Alzheimer's disease	Bansode SB, Jana AK, Batkulwar KB, Warkad SD, Joshi RS, Sengupta N, Kulkarni MJ.	PLoS One. 2014 Aug 20;9(8):e105196. doi: 10.1371/journal.pone.0105196. eCollection 2014.	Bansode SB	PLoS One	2014	2014-08-21	PMC4139341		10.1371/journal.pone.0105196
29226720	Memantine induces apoptosis and inhibits cell cycle progression in LNCaP prostate cancer cells	Albayrak G, Konac E, Dikmen AU, Bilen CY.	Hum Exp Toxicol. 2018 Sep;37(9):953-958. doi: 10.1177/0960327117747025. Epub 2017 Dec 11.	Albayrak G	Hum Exp Toxicol	2018	2017-12-12			10.1177/0960327117747025
29932108	Proximal Pathway Enrichment Analysis for Targeting Comorbid Diseases via Network Endopharmacology	Aguirre-Plans J, Piñero J, Menche J, Sanz F, Furlong LI, Schmidt HHHW, Oliva B, Guney E.	Pharmaceuticals (Basel). 2018 Jun 22;11(3):61. doi: 10.3390/ph11030061.	Aguirre-Plans J	Pharmaceuticals (Basel)	2018	2018-06-23	PMC6160959		10.3390/ph11030061
33309911	Gintonin mitigates experimental autoimmune encephalomyelitis by stabilization of Nrf2 signaling via stimulation of lysophosphatidic acid receptors	Choi JH, Oh J, Lee MJ, Ko SG, Nah SY, Cho IH.	Brain Behav Immun. 2021 Mar;93:384-398. doi: 10.1016/j.bbi.2020.12.004. Epub 2020 Dec 10.	Choi JH	Brain Behav Immun	2021	2020-12-14			10.1016/j.bbi.2020.12.004
27965247	Can commonly prescribed drugs be repurposed for the prevention or treatment of Alzheimer's and other neurodegenerative diseases? Protocol for an observational cohort study in the UK Clinical Practice Research Datalink	Walker VM, Davies NM, Jones T, Kehoe PG, Martin RM.	BMJ Open. 2016 Dec 13;6(12):e012044. doi: 10.1136/bmjopen-2016-012044.	Walker VM	BMJ Open	2016	2016-12-15	PMC5168636		10.1136/bmjopen-2016-012044
25727737	Pharmacological treatment and prevention of cerebral small vessel disease: a review of potential interventions	Bath PM, Wardlaw JM.	Int J Stroke. 2015 Jun;10(4):469-78. doi: 10.1111/ijs.12466. Epub 2015 Mar 2.	Bath PM	Int J Stroke	2015	2015-03-03	PMC4832291		10.1111/ijs.12466
25566747	Combining two repurposed drugs as a promising approach for Alzheimer's disease therapy	Chumakov I, Nabirotchkin S, Cholet N, Milet A, Boucard A, Toulorge D, Pereira Y, Graudens E, Traoré S, Foucquier J, Guedj M, Vial E, Callizot N, Steinschneider R, Maurice T, Bertrand V, Scart-Grès C, Hajj R, Cohen D.	Sci Rep. 2015 Jan 8;5:7608. doi: 10.1038/srep07608.	Chumakov I	Sci Rep	2015	2015-01-09	PMC5378993		10.1038/srep07608
31894741	Recent Advances in the Rational Drug Design Based on Multi-target Ligands	Yang T, Sui X, Yu B, Shen Y, Cong H.	Curr Med Chem. 2020 Aug 6;27(28):4720-4740. doi: 10.2174/0929867327666200102120652.	Yang T	Curr Med Chem	2020	2020-01-03			10.2174/0929867327666200102120652
31295555	(-)-Phenserine and the prevention of pre-programmed cell death and neuroinflammation in mild traumatic brain injury and Alzheimer's disease challenged mice	Lecca D, Bader M, Tweedie D, Hoffman AF, Jung YJ, Hsueh SC, Hoffer BJ, Becker RE, Pick CG, Lupica CR, Greig NH.	Neurobiol Dis. 2019 Oct;130:104528. doi: 10.1016/j.nbd.2019.104528. Epub 2019 Jul 8.	Lecca D	Neurobiol Dis	2019	2019-07-12	PMC6716152	NIHMS1047120	10.1016/j.nbd.2019.104528
31275894	Prospective of managing impaired brain insulin signalling in late onset Alzheimers disease with excisting diabetic drugs	Jojo GM, Kuppusamy G, Selvaraj K, Baruah UK.	J Diabetes Metab Disord. 2019 May 9;18(1):229-242. doi: 10.1007/s40200-019-00405-2. eCollection 2019 Jun.	Jojo GM	J Diabetes Metab Disord	2019	2019-07-06	PMC6582098		10.1007/s40200-019-00405-2
33738783	The Future of Incretin-Based Approaches for Neurodegenerative Diseases in Older Adults: Which to Choose? A Review of their Potential Efficacy and Suitability	Girges C, Vijiaratnam N, Athauda D, Auld G, Gandhi S, Foltynie T.	Drugs Aging. 2021 May;38(5):355-373. doi: 10.1007/s40266-021-00853-7. Epub 2021 Mar 19.	Girges C	Drugs Aging	2021	2021-03-19			10.1007/s40266-021-00853-7
32589834	Targeting Pathological Tau by Small Molecule Inhibition of the Poly(A):MSUT2 RNA-Protein Interaction	Baker JD, Uhrich RL, Strovas TJ, Saxton AD, Kraemer BC.	ACS Chem Neurosci. 2020 Aug 5;11(15):2277-2285. doi: 10.1021/acschemneuro.0c00214. Epub 2020 Jul 9.	Baker JD	ACS Chem Neurosci	2020	2020-06-27	PMC8629322	NIHMS1758943	10.1021/acschemneuro.0c00214
33713002	Pharmacological Inhibition of Brain EGFR Activation By a BBB-penetrating Inhibitor, AZD3759, Attenuates α-synuclein Pathology in a Mouse Model of α-Synuclein Propagation	Tavassoly O, Del Cid Pellitero E, Larroquette F, Cai E, Thomas RA, Soubannier V, Luo W, Durcan TM, Fon EA.	Neurotherapeutics. 2021 Apr;18(2):979-997. doi: 10.1007/s13311-021-01017-6. Epub 2021 Mar 12.	Tavassoly O	Neurotherapeutics	2021	2021-03-13	PMC8423974		10.1007/s13311-021-01017-6
31000720	Felodipine induces autophagy in mouse brains with pharmacokinetics amenable to repurposing	Siddiqi FH, Menzies FM, Lopez A, Stamatakou E, Karabiyik C, Ureshino R, Ricketts T, Jimenez-Sanchez M, Esteban MA, Lai L, Tortorella MD, Luo Z, Liu H, Metzakopian E, Fernandes HJR, Bassett A, Karran E, Miller BL, Fleming A, Rubinsztein DC.	Nat Commun. 2019 Apr 18;10(1):1817. doi: 10.1038/s41467-019-09494-2.	Siddiqi FH	Nat Commun	2019	2019-04-20	PMC6472390		10.1038/s41467-019-09494-2
35401145	Identification of Potential Driver Genes and Pathways Based on Transcriptomics Data in Alzheimer's Disease	Xia LY, Tang L, Huang H, Luo J.	Front Aging Neurosci. 2022 Mar 18;14:752858. doi: 10.3389/fnagi.2022.752858. eCollection 2022.	Xia LY	Front Aging Neurosci	2022	2022-04-11	PMC8985410		10.3389/fnagi.2022.752858
28886718	Repositioning drugs for traumatic brain injury - N-acetyl cysteine and Phenserine	Hoffer BJ, Pick CG, Hoffer ME, Becker RE, Chiang YH, Greig NH.	J Biomed Sci. 2017 Sep 9;24(1):71. doi: 10.1186/s12929-017-0377-1.	Hoffer BJ	J Biomed Sci	2017	2017-09-10	PMC5591517		10.1186/s12929-017-0377-1
32350120	Inhibition of Brain Epidermal Growth Factor Receptor Activation: A Novel Target in Neurodegenerative Diseases and Brain Injuries	Tavassoly O, Sato T, Tavassoly I.	Mol Pharmacol. 2020 Jul;98(1):13-22. doi: 10.1124/mol.120.119909. Epub 2020 Apr 29.	Tavassoly O	Mol Pharmacol	2020	2020-05-01			10.1124/mol.120.119909
31396078	Ketamine: A Neglected Therapy for Alzheimer Disease	Smalheiser NR.	Front Aging Neurosci. 2019 Jul 24;11:186. doi: 10.3389/fnagi.2019.00186. eCollection 2019.	Smalheiser NR	Front Aging Neurosci	2019	2019-08-10	PMC6667975		10.3389/fnagi.2019.00186
33374646	Improved Bioavailability of Montelukast through a Novel Oral Mucoadhesive Film in Humans and Mice	Michael J, Bessa de Sousa D, Conway J, Gonzalez-Labrada E, Obeid R, Tevini J, Felder T, Hutter-Paier B, Zerbe H, Paiement N, Aigner L.	Pharmaceutics. 2020 Dec 23;13(1):12. doi: 10.3390/pharmaceutics13010012.	Michael J	Pharmaceutics	2020	2020-12-30	PMC7822410		10.3390/pharmaceutics13010012
26066505	Checking the STEP-Associated Trafficking and Internalization of Glutamate Receptors for Reduced Cognitive Deficits: A Machine Learning Approach-Based Cheminformatics Study and Its Application for Drug Repurposing	Jamal S, Goyal S, Shanker A, Grover A.	PLoS One. 2015 Jun 12;10(6):e0129370. doi: 10.1371/journal.pone.0129370. eCollection 2015.	Jamal S	PLoS One	2015	2015-06-13	PMC4466797		10.1371/journal.pone.0129370
28676010	KCa3.1 Channel Modulators as Potential Therapeutic Compounds for Glioblastoma	Brown BM, Pressley B, Wulff H.	Curr Neuropharmacol. 2018;16(5):618-626. doi: 10.2174/1570159X15666170630164226.	Brown BM	Curr Neuropharmacol	2018	2017-07-06	PMC5997873		10.2174/1570159X15666170630164226
34035826	A Study to Decipher the Potential Effects of Butylphthalide against Central Nervous System Diseases Based on Network Pharmacology and Molecular Docking Integration Strategy	Zhao Q, Zheng B, Feng P, Li X.	Evid Based Complement Alternat Med. 2021 May 4;2021:6694698. doi: 10.1155/2021/6694698. eCollection 2021.	Zhao Q	Evid Based Complement Alternat Med	2021	2021-05-26	PMC8116153		10.1155/2021/6694698
25946000	Drug repositioning for diabetes based on 'omics' data mining	Zhang M, Luo H, Xi Z, Rogaeva E.	PLoS One. 2015 May 6;10(5):e0126082. doi: 10.1371/journal.pone.0126082. eCollection 2015.	Zhang M	PLoS One	2015	2015-05-07	PMC4422696		10.1371/journal.pone.0126082
24177719	The functional therapeutic chemical classification system	Croset S, Overington JP, Rebholz-Schuhmann D.	Bioinformatics. 2014 Mar 15;30(6):876-83. doi: 10.1093/bioinformatics/btt628. Epub 2013 Oct 30.	Croset S	Bioinformatics	2014	2013-11-02	PMC3957075		10.1093/bioinformatics/btt628
33255764	Anti-Inflammatory Treatment with FTY720 Starting after Onset of Symptoms Reverses Synaptic Deficits in an AD Mouse Model	Kartalou GI, Salgueiro-Pereira AR, Endres T, Lesnikova A, Casarotto P, Pousinha P, Delanoe K, Edelmann E, Castrén E, Gottmann K, Marie H, Lessmann V.	Int J Mol Sci. 2020 Nov 25;21(23):8957. doi: 10.3390/ijms21238957.	Kartalou GI	Int J Mol Sci	2020	2020-12-01	PMC7734581		10.3390/ijms21238957
32805742	Expanded access: opening doors to personalized medicine for rare disease patients and patients with neurodegenerative diseases	Özdinler PH.	FEBS J. 2021 Mar;288(5):1457-1461. doi: 10.1111/febs.15529. Epub 2020 Sep 5.	Özdinler PH	FEBS J	2021	2020-08-18	PMC7887139	NIHMS1630508	10.1111/febs.15529
34607546	Precision Psychiatry: Machine learning as a tool to find new pharmacological targets	Rema J, Novais F, Telles-Correia D.	Curr Top Med Chem. 2021 Oct 3. doi: 10.2174/1568026621666211004095917. Online ahead of print.	Rema J	Curr Top Med Chem	2021	2021-10-05			10.2174/1568026621666211004095917
33567615	Repurposing of Omarigliptin as a Neuroprotective Agent Based on Docking with A(2A) Adenosine and AChE Receptors, Brain GLP-1 Response and Its Brain/Plasma Concentration Ratio after 28 Days Multiple Doses in Rats Using LC-MS/MS	Ayoub BM, Michel HE, Mowaka S, Hendy MS, Tadros MM.	Molecules. 2021 Feb 8;26(4):889. doi: 10.3390/molecules26040889.	Ayoub BM	Molecules	2021	2021-02-11	PMC7915074		10.3390/molecules26040889
27543171	A call for comparative effectiveness research to learn whether routine clinical care decisions can protect from dementia and cognitive decline	Dacks PA, Armstrong JJ, Brannan SK, Carman AJ, Green AM, Kirkman MS, Krakoff LR, Kuller LH, Launer LJ, Lovestone S, Merikle E, Neumann PJ, Rockwood K, Shineman DW, Stefanacci RG, Velentgas P, Viswanathan A, Whitmer RA, Williamson JD, Fillit HM.	Alzheimers Res Ther. 2016 Aug 20;8:33. doi: 10.1186/s13195-016-0200-3.	Dacks PA	Alzheimers Res Ther	2016	2016-08-21	PMC4992192		10.1186/s13195-016-0200-3
34988543	Machine Learning Based Prediction of COVID-19 Mortality Suggests Repositioning of Anticancer Drug for Treating Severe Cases	Linden T, Hanses F, Domingo-Fernández D, DeLong LN, Kodamullil AT, Schneider J, Vehreschild MJGT, Lanznaster J, Ruethrich MM, Borgmann S, Hower M, Wille K, Feldt T, Rieg S, Hertenstein B, Wyen C, Roemmele C, Vehreschild JJ, Jakob CEM, Stecher M, Kuzikov M, Zaliani A, Fröhlich H; LEOSS study group.	Artif Intell Life Sci. 2021 Dec;1:100020. doi: 10.1016/j.ailsci.2021.100020. Epub 2021 Dec 17.	Linden T	Artif Intell Life Sci	2021	2022-01-06	PMC8677630		10.1016/j.ailsci.2021.100020
32003771	A Bayesian approach to accurate and robust signature detection on LINCS L1000 data	Qiu Y, Lu T, Lim H, Xie L.	Bioinformatics. 2020 May 1;36(9):2787-2795. doi: 10.1093/bioinformatics/btaa064.	Qiu Y	Bioinformatics	2020	2020-02-01	PMC7203754		10.1093/bioinformatics/btaa064
30501602	Role of Muscarinic Acetylcholine Receptors in Breast Cancer: Design of Metronomic Chemotherapy	Sales ME, Español AJ, Salem AR, Pulido PM, Sanchez Y, Sanchez F.	Curr Clin Pharmacol. 2019;14(2):91-100. doi: 10.2174/1574884714666181203095437.	Sales ME	Curr Clin Pharmacol	2019	2018-12-04	PMC7011678		10.2174/1574884714666181203095437
30165597	Neuroprotective exendin-4 enhances hypothermia therapy in a model of hypoxic-ischaemic encephalopathy	Rocha-Ferreira E, Poupon L, Zelco A, Leverin AL, Nair S, Jonsdotter A, Carlsson Y, Thornton C, Hagberg H, Rahim AA.	Brain. 2018 Oct 1;141(10):2925-2942. doi: 10.1093/brain/awy220.	Rocha-Ferreira E	Brain	2018	2018-08-31	PMC6158761		10.1093/brain/awy220
29170097	Mild cognitive impairment due to Alzheimer disease: Contemporary approaches to diagnostics and pharmacological intervention	Bachurin SO, Gavrilova SI, Samsonova A, Barreto GE, Aliev G.	Pharmacol Res. 2018 Mar;129:216-226. doi: 10.1016/j.phrs.2017.11.021. Epub 2017 Nov 21.	Bachurin SO	Pharmacol Res	2018	2017-11-25			10.1016/j.phrs.2017.11.021
35395400	Repurposing small-molecule drugs for modulating toxic protein aggregates in neurodegenerative diseases	Liu W, Wang G, Wang Z, Wang G, Huang J, Liu B.	Drug Discov Today. 2022 Apr 6:S1359-6446(22)00134-9. doi: 10.1016/j.drudis.2022.04.003. Online ahead of print.	Liu W	Drug Discov Today	2022	2022-04-08			10.1016/j.drudis.2022.04.003
33921428	Metabolic Shifts as the Hallmark of Most Common Diseases: The Quest for the Underlying Unity	Schwartz L, Henry M, Alfarouk KO, Reshkin SJ, Radman M.	Int J Mol Sci. 2021 Apr 12;22(8):3972. doi: 10.3390/ijms22083972.	Schwartz L	Int J Mol Sci	2021	2021-04-30	PMC8068795		10.3390/ijms22083972
33132895	Phenotype-Agnostic Molecular Subtyping of Neurodegenerative Disorders: The Cincinnati Cohort Biomarker Program (CCBP)	Sturchio A, Marsili L, Vizcarra JA, Dwivedi AK, Kauffman MA, Duker AP, Lu P, Pauciulo MW, Wissel BD, Hill EJ, Stecher B, Keeling EG, Vagal AS, Wang L, Haslam DB, Robson MJ, Tanner CM, Hagey DW, El Andaloussi S, Ezzat K, Fleming RMT, Lu LJ, Little MA, Espay AJ.	Front Aging Neurosci. 2020 Oct 8;12:553635. doi: 10.3389/fnagi.2020.553635. eCollection 2020.	Sturchio A	Front Aging Neurosci	2020	2020-11-02	PMC7578373		10.3389/fnagi.2020.553635
35456509	Characterization of Altered Molecular Pathways in the Entorhinal Cortex of Alzheimer's Disease Patients and In Silico Prediction of Potential Repurposable Drugs	Fagone P, Mangano K, Martino G, Quattropani MC, Pennisi M, Bella R, Fisicaro F, Nicoletti F, Petralia MC.	Genes (Basel). 2022 Apr 15;13(4):703. doi: 10.3390/genes13040703.	Fagone P	Genes (Basel)	2022	2022-04-23	PMC9028005		10.3390/genes13040703
35030496	DeepMGT-DTI: Transformer network incorporating multilayer graph information for Drug-Target interaction prediction	Zhang P, Wei Z, Che C, Jin B.	Comput Biol Med. 2022 Mar;142:105214. doi: 10.1016/j.compbiomed.2022.105214. Epub 2022 Jan 5.	Zhang P	Comput Biol Med	2022	2022-01-14			10.1016/j.compbiomed.2022.105214
29743517	Identification of new EphA4 inhibitors by virtual screening of FDA-approved drugs	Gu S, Fu WY, Fu AKY, Tong EPS, Ip FCF, Huang X, Ip NY.	Sci Rep. 2018 May 9;8(1):7377. doi: 10.1038/s41598-018-25790-1.	Gu S	Sci Rep	2018	2018-05-11	PMC5943255		10.1038/s41598-018-25790-1
32714562	Elucidating the mechanisms by which disulfiram protects against obesity and metabolic syndrome	Bernier M, Harney D, Koay YC, Diaz A, Singh A, Wahl D, Pulpitel T, Ali A, Guiterrez V, Mitchell SJ, Kim EY, Mach J, Price NL, Aon MA, LeCouteur DG, Cogger VC, Fernandez-Hernando C, O'Sullivan J, Larance M, Cuervo AM, de Cabo R.	NPJ Aging Mech Dis. 2020 Jul 21;6:8. doi: 10.1038/s41514-020-0046-6. eCollection 2020.	Bernier M	NPJ Aging Mech Dis	2020	2020-07-28	PMC7374720		10.1038/s41514-020-0046-6
30396916	Plasma and Brain Concentrations of Doxycycline after Single and Repeated Doses in Wild-Type and APP23 Mice	Lucchetti J, Fracasso C, Balducci C, Passoni A, Forloni G, Salmona M, Gobbi M.	J Pharmacol Exp Ther. 2019 Jan;368(1):32-40. doi: 10.1124/jpet.118.252064. Epub 2018 Nov 5.	Lucchetti J	J Pharmacol Exp Ther	2019	2018-11-07			10.1124/jpet.118.252064
27392852	High-Throughput Screening for Identification of Blood-Brain Barrier Integrity Enhancers: A Drug Repurposing Opportunity to Rectify Vascular Amyloid Toxicity	Qosa H, Mohamed LA, Al Rihani SB, Batarseh YS, Duong QV, Keller JN, Kaddoumi A.	J Alzheimers Dis. 2016 Jul 6;53(4):1499-516. doi: 10.3233/JAD-151179.	Qosa H	J Alzheimers Dis	2016	2016-07-10	PMC4992409	NIHMS807591	10.3233/JAD-151179
31060348	miR-132 regulates the expression of synaptic proteins in APP/PS1 transgenic mice through C1q	Xu N, Li AD, Ji LL, Ye Y, Wang ZY, Tong L.	Eur J Histochem. 2019 May 3;63(2):3008. doi: 10.4081/ejh.2019.3008.	Xu N	Eur J Histochem	2019	2019-05-08	PMC6511887		10.4081/ejh.2019.3008
30688255	Repositioning of dipeptidyl peptidase-4 inhibitors and glucagon like peptide-1 agonists as potential neuroprotective agents	Mousa SA, Ayoub BM.	Neural Regen Res. 2019 May;14(5):745-748. doi: 10.4103/1673-5374.249217.	Mousa SA	Neural Regen Res	2019	2019-01-29	PMC6375047		10.4103/1673-5374.249217
32183090	Exploratory Analysis of iPSCS-Derived Neuronal Cells as Predictors of Diagnosis and Treatment of Alzheimer Disease	Cavalli E, Battaglia G, Basile MS, Bruno V, Petralia MC, Lombardo SD, Pennisi M, Kalfin R, Tancheva L, Fagone P, Nicoletti F, Mangano K.	Brain Sci. 2020 Mar 13;10(3):166. doi: 10.3390/brainsci10030166.	Cavalli E	Brain Sci	2020	2020-03-19	PMC7139610		10.3390/brainsci10030166
35120619	iPSC-based disease modeling and drug discovery in cardinal neurodegenerative disorders	Okano H, Morimoto S.	Cell Stem Cell. 2022 Feb 3;29(2):189-208. doi: 10.1016/j.stem.2022.01.007.	Okano H	Cell Stem Cell	2022	2022-02-05			10.1016/j.stem.2022.01.007
28155639	Inferring new indications for approved drugs via random walk on drug-disease heterogenous networks	Liu H, Song Y, Guan J, Luo L, Zhuang Z.	BMC Bioinformatics. 2016 Dec 23;17(Suppl 17):539. doi: 10.1186/s12859-016-1336-7.	Liu H	BMC Bioinformatics	2016	2017-02-04	PMC5259862		10.1186/s12859-016-1336-7
29906562	Amino acid conjugated chitosan nanoparticles for the brain targeting of a model dipeptidyl peptidase-4 inhibitor	Fernandes J, Ghate MV, Basu Mallik S, Lewis SA.	Int J Pharm. 2018 Aug 25;547(1-2):563-571. doi: 10.1016/j.ijpharm.2018.06.031. Epub 2018 Jun 15.	Fernandes J	Int J Pharm	2018	2018-06-16			10.1016/j.ijpharm.2018.06.031
32598251	In Silico Repurposing of J147 for Neonatal Encephalopathy Treatment: Exploring Molecular Mechanisms of Mutant Mitochondrial ATP Synthase	Emmanuel IA, Olotu FA, Agoni C, Soliman MES.	Curr Pharm Biotechnol. 2020;21(14):1551-1566. doi: 10.2174/1389201021666200628152246.	Emmanuel IA	Curr Pharm Biotechnol	2020	2020-06-30			10.2174/1389201021666200628152246
34216705	New approaches for developing multi-targeted drug combinations for disease modification of complex brain disorders. Does epilepsy prevention become a realistic goal?	Löscher W, Klein P.	Pharmacol Ther. 2022 Jan;229:107934. doi: 10.1016/j.pharmthera.2021.107934. Epub 2021 Jun 30.	Löscher W	Pharmacol Ther	2022	2021-07-03			10.1016/j.pharmthera.2021.107934
23868238	NIH gambles on recycled drugs	Wadman M.	Nature. 2013 Jul 18;499(7458):263-4. doi: 10.1038/499263a.	Wadman M	Nature	2013	2013-07-23			10.1038/499263a
26663255	Development and Application of a Virtual Screening Protocol for the Identification of Multitarget Fragments	Bottegoni G, Veronesi M, Bisignano P, Kacker P, Favia AD, Cavalli A.	ChemMedChem. 2016 Jun 20;11(12):1259-63. doi: 10.1002/cmdc.201500521. Epub 2015 Dec 10.	Bottegoni G	ChemMedChem	2016	2015-12-15			10.1002/cmdc.201500521
34906605	Convolutions in the rendition of nose to brain therapeutics from bench to bedside: Feats & fallacies	Goel H, Kalra V, Verma SK, Dubey SK, Tiwary AK.	J Control Release. 2022 Jan;341:782-811. doi: 10.1016/j.jconrel.2021.12.009. Epub 2021 Dec 11.	Goel H	J Control Release	2022	2021-12-15			10.1016/j.jconrel.2021.12.009
32864416	Whole transcriptome in silico screening implicates cardiovascular and infectious disease in the mechanism of action underlying atypical antipsychotic side effects	Malekizadeh Y, Williams G, Kelson M, Whitfield D, Mill J, Collier DA, Ballard C, Jeffries AR, Creese B.	Alzheimers Dement (N Y). 2020 Aug 24;6(1):e12078. doi: 10.1002/trc2.12078. eCollection 2020.	Malekizadeh Y	Alzheimers Dement (N Y)	2020	2020-09-01	PMC7443741		10.1002/trc2.12078
31217489	Shared Molecular Signatures Across Neurodegenerative Diseases and Herpes Virus Infections Highlights Potential Mechanisms for Maladaptive Innate Immune Responses	Costa Sa AC, Madsen H, Brown JR.	Sci Rep. 2019 Jun 19;9(1):8795. doi: 10.1038/s41598-019-45129-8.	Costa Sa AC	Sci Rep	2019	2019-06-21	PMC6584587		10.1038/s41598-019-45129-8
33539089	Recent Developments in the Use of Kinase Inhibitors for Management of Viral Infections	Raghuvanshi R, Bharate SB.	J Med Chem. 2022 Jan 27;65(2):893-921. doi: 10.1021/acs.jmedchem.0c01467. Epub 2021 Feb 4.	Raghuvanshi R	J Med Chem	2022	2021-02-04			10.1021/acs.jmedchem.0c01467
32059848	Identifying inducers of BDNF gene expression from pharmacologically validated compounds; antipyretic drug dipyrone increases BDNF mRNA in neurons	Fukuchi M.	Biochem Biophys Res Commun. 2020 Apr 16;524(4):957-962. doi: 10.1016/j.bbrc.2020.02.019. Epub 2020 Feb 12.	Fukuchi M	Biochem Biophys Res Commun	2020	2020-02-16			10.1016/j.bbrc.2020.02.019
31686177	Repurposing radiotracers for myelin imaging: a study comparing 18F-florbetaben, 18F-florbetapir, 18F-flutemetamol,11C-MeDAS, and 11C-PiB	Auvity S, Tonietto M, Caillé F, Bodini B, Bottlaender M, Tournier N, Kuhnast B, Stankoff B.	Eur J Nucl Med Mol Imaging. 2020 Feb;47(2):490-501. doi: 10.1007/s00259-019-04516-z. Epub 2019 Nov 4.	Auvity S	Eur J Nucl Med Mol Imaging	2020	2019-11-06			10.1007/s00259-019-04516-z
34443629	Chemoinformatics Analyses of Tau Ligands Reveal Key Molecular Requirements for the Identification of Potential Drug Candidates against Tauopathies	Pinzi L, Tinivella A, Rastelli G.	Molecules. 2021 Aug 20;26(16):5039. doi: 10.3390/molecules26165039.	Pinzi L	Molecules	2021	2021-08-27	PMC8400687		10.3390/molecules26165039
34923338	An identification of MARK inhibitors using high throughput MALDI-TOF mass spectrometry	Hruba L, Polishchuk P, Das V, Hajduch M, Dzubak P.	Biomed Pharmacother. 2022 Feb;146:112549. doi: 10.1016/j.biopha.2021.112549. Epub 2021 Dec 16.	Hruba L	Biomed Pharmacother	2022	2021-12-19			10.1016/j.biopha.2021.112549
33090434	Could dantrolene be explored as a repurposed drug to treat COVID-19 patients by restoring intracellular calcium homeostasis?	Jiang B, Liang S, Liang G, Wei H.	Eur Rev Med Pharmacol Sci. 2020 Oct;24(19):10228-10238. doi: 10.26355/eurrev_202010_23247.	Jiang B	Eur Rev Med Pharmacol Sci	2020	2020-10-22	PMC7702195	NIHMS1649291	10.26355/eurrev_202010_23247
27217151	Mood, stress and longevity: convergence on ANK3	Rangaraju S, Levey DF, Nho K, Jain N, Andrews KD, Le-Niculescu H, Salomon DR, Saykin AJ, Petrascheck M, Niculescu AB.	Mol Psychiatry. 2016 Aug;21(8):1037-49. doi: 10.1038/mp.2016.65. Epub 2016 May 24.	Rangaraju S	Mol Psychiatry	2016	2016-05-25			10.1038/mp.2016.65
34751120	Advances in PPARs Molecular Dynamics and Glitazones as a Repurposing Therapeutic Strategy through Mitochondrial Redox Dynamics against Neurodegeneration	Durai P, Beeraka NM, Ramachandrappa HVP, Krishnan P, Gudur P, Raghavendra NM, Ravanappa PKB.	Curr Neuropharmacol. 2022;20(5):893-915. doi: 10.2174/1570159X19666211109141330.	Durai P	Curr Neuropharmacol	2022	2021-11-09			10.2174/1570159X19666211109141330
29616790	Novel Tadalafil Derivatives Ameliorates Scopolamine-Induced Cognitive Impairment in Mice via Inhibition of Acetylcholinesterase (AChE) and Phosphodiesterase 5 (PDE5)	Ni W, Wang H, Li X, Zheng X, Wang M, Zhang J, Gong Q, Ling D, Mao F, Zhang H, Li J.	ACS Chem Neurosci. 2018 Jul 18;9(7):1625-1636. doi: 10.1021/acschemneuro.8b00014. Epub 2018 Apr 17.	Ni W	ACS Chem Neurosci	2018	2018-04-05			10.1021/acschemneuro.8b00014
26612616	Effects of the nicotinic agonist varenicline on the performance of tasks of cognition in aged and middle-aged rhesus and pigtail monkeys	Terry AV Jr, Plagenhoef M, Callahan PM.	Psychopharmacology (Berl). 2016 Mar;233(5):761-71. doi: 10.1007/s00213-015-4154-0. Epub 2015 Nov 27.	Terry AV Jr	Psychopharmacology (Berl)	2016	2015-11-28	PMC4752862	NIHMS741408	10.1007/s00213-015-4154-0
32750869	GuiltyTargets: Prioritization of Novel Therapeutic Targets With Network Representation Learning	Muslu O, Hoyt CT, Lacerda M, Hofmann-Apitius M, Frohlich H.	IEEE/ACM Trans Comput Biol Bioinform. 2022 Jan-Feb;19(1):491-500. doi: 10.1109/TCBB.2020.3003830. Epub 2022 Feb 3.	Muslu O	IEEE/ACM Trans Comput Biol Bioinform	2022	2020-08-06			10.1109/TCBB.2020.3003830
31689244	Correcting Smad1/5/8, mTOR, and VEGFR2 treats pathology in hereditary hemorrhagic telangiectasia models	Ruiz S, Zhao H, Chandakkar P, Papoin J, Choi H, Nomura-Kitabayashi A, Patel R, Gillen M, Diao L, Chatterjee PK, He M, Al-Abed Y, Wang P, Metz CN, Oh SP, Blanc L, Campagne F, Marambaud P.	J Clin Invest. 2020 Feb 3;130(2):942-957. doi: 10.1172/JCI127425.	Ruiz S	J Clin Invest	2020	2019-11-06	PMC6994128		10.1172/JCI127425
35518630	Bleomycin modulates amyloid aggregation in β-amyloid and hIAPP	Kumari A, Sharma R, Shrivastava N, Somvanshi P, Grover A.	RSC Adv. 2020 Jul 9;10(43):25929-25946. doi: 10.1039/d0ra04949b. eCollection 2020 Jul 3.	Kumari A	RSC Adv	2020	2022-05-06	PMC9055351		10.1039/d0ra04949b
30678613	Oxidative Status in Multiple Sclerosis and Off-Targets of Antioxidants: The Case of Edaravone	Agresti C, Mechelli R, Olla S, Veroni C, Eleuteri C, Ristori G, Salvetti M.	Curr Med Chem. 2020;27(13):2095-2105. doi: 10.2174/0929867326666190124122752.	Agresti C	Curr Med Chem	2020	2019-01-26			10.2174/0929867326666190124122752
28755170	Identification and validation of uterine stimulant methylergometrine as a potential inhibitor of caspase-1 activation	García-Laínez G, Sancho M, García-Bayarri V, Orzáez M.	Apoptosis. 2017 Oct;22(10):1310-1318. doi: 10.1007/s10495-017-1405-z.	García-Laínez G	Apoptosis	2017	2017-07-30	PMC5630661		10.1007/s10495-017-1405-z
31469892	Structural Insights into Curli CsgA Cross-β Fibril Architecture Inspire Repurposing of Anti-amyloid Compounds as Anti-biofilm Agents	Perov S, Lidor O, Salinas N, Golan N, Tayeb-Fligelman E, Deshmukh M, Willbold D, Landau M.	PLoS Pathog. 2019 Aug 30;15(8):e1007978. doi: 10.1371/journal.ppat.1007978. eCollection 2019 Aug.	Perov S	PLoS Pathog	2019	2019-08-31	PMC6748439		10.1371/journal.ppat.1007978
23704553	Comment on "ApoE-directed therapeutics rapidly clear β-amyloid and reverse deficits in AD mouse models"	Price AR, Xu G, Siemienski ZB, Smithson LA, Borchelt DR, Golde TE, Felsenstein KM.	Science. 2013 May 24;340(6135):924-d. doi: 10.1126/science.1234089.	Price AR	Science	2013	2013-05-25			10.1126/science.1234089
28456941	Activation of Glucagon-Like Peptide-1 Receptor Promotes Neuroprotection in Experimental Autoimmune Encephalomyelitis by Reducing Neuroinflammatory Responses	Lee CH, Jeon SJ, Cho KS, Moon E, Sapkota A, Jun HS, Ryu JH, Choi JW.	Mol Neurobiol. 2018 Apr;55(4):3007-3020. doi: 10.1007/s12035-017-0550-2. Epub 2017 Apr 29.	Lee CH	Mol Neurobiol	2018	2017-05-01			10.1007/s12035-017-0550-2
30443749	Structural disorder in the proteome and interactome of Alkhurma virus (ALKV)	Redwan EM, AlJaddawi AA, Uversky VN.	Cell Mol Life Sci. 2019 Feb;76(3):577-608. doi: 10.1007/s00018-018-2968-8. Epub 2018 Nov 15.	Redwan EM	Cell Mol Life Sci	2019	2018-11-17	PMC7079808		10.1007/s00018-018-2968-8
29705602	Liraglutide attenuates the depressive- and anxiety-like behaviour in the corticosterone induced depression model via improving hippocampal neural plasticity	Weina H, Yuhu N, Christian H, Birong L, Feiyu S, Le W.	Brain Res. 2018 Sep 1;1694:55-62. doi: 10.1016/j.brainres.2018.04.031. Epub 2018 Apr 27.	Weina H	Brain Res	2018	2018-04-30			10.1016/j.brainres.2018.04.031
34813998	Drug connectivity mapping and functional analysis reveal therapeutic small molecules that differentially modulate myelination	Rivera AD, Pieropan F, Williams G, Calzolari F, Butt AM, Azim K.	Biomed Pharmacother. 2022 Jan;145:112436. doi: 10.1016/j.biopha.2021.112436. Epub 2021 Nov 20.	Rivera AD	Biomed Pharmacother	2022	2021-11-23	PMC8664715		10.1016/j.biopha.2021.112436
25387614	Modulation of the Aβ peptide aggregation pathway by KP1019 limits Aβ-associated neurotoxicity	Jones MR, Mu C, Wang MC, Webb MI, Walsby CJ, Storr T.	Metallomics. 2015 Jan;7(1):129-35. doi: 10.1039/c4mt00252k. Epub 2014 Nov 12.	Jones MR	Metallomics	2015	2014-11-13			10.1039/c4mt00252k
35543162	Antitumor effect of memantine is related to the formation of the splicing isoform of GLG1, a decoy FGF‑binding protein	Yamaguchi F, Hayakawa S, Kawashima S, Asakura T, Oishi Y.	Int J Oncol. 2022 Jul;61(1):80. doi: 10.3892/ijo.2022.5370. Epub 2022 May 11.	Yamaguchi F	Int J Oncol	2022	2022-05-11			10.3892/ijo.2022.5370
25284792	Modeling cerebrovascular pathophysiology in amyloid-β metabolism using neural-crest-derived smooth muscle cells	Cheung C, Goh YT, Zhang J, Wu C, Guccione E.	Cell Rep. 2014 Oct 9;9(1):391-401. doi: 10.1016/j.celrep.2014.08.065. Epub 2014 Oct 2.	Cheung C	Cell Rep	2014	2014-10-07			10.1016/j.celrep.2014.08.065
24632812	Transcriptomic analysis of the effects of a fish oil enriched diet on murine brains	Hammamieh R, Chakraborty N, Gautam A, Miller SA, Muhie S, Meyerhoff J, Jett M.	PLoS One. 2014 Mar 14;9(3):e90425. doi: 10.1371/journal.pone.0090425. eCollection 2014.	Hammamieh R	PLoS One	2014	2014-03-18	PMC3954562		10.1371/journal.pone.0090425
29067312	A multicenter, randomized, placebo-controlled trial for cilostazol in patients with mild cognitive impairment: The COMCID study protocol	Saito S, Kojima S, Oishi N, Kakuta R, Maki T, Yasuno F, Nagatsuka K, Yamamoto H, Fukuyama H, Fukushima M, Ihara M.	Alzheimers Dement (N Y). 2016 Oct 27;2(4):250-257. doi: 10.1016/j.trci.2016.10.001. eCollection 2016 Nov.	Saito S	Alzheimers Dement (N Y)	2016	2017-10-26	PMC5651350		10.1016/j.trci.2016.10.001
25143259	Finding off-targets, biological pathways, and target diseases for chymase inhibitors via structure-based systems biology approach	Arooj M, Sakkiah S, Cao GP, Kim S, Arulalapperumal V, Lee KW.	Proteins. 2015 Jul;83(7):1209-24. doi: 10.1002/prot.24677. Epub 2015 May 4.	Arooj M	Proteins	2015	2014-08-22			10.1002/prot.24677
34743390	Antitumour drugs targeting tau R3 VQIVYK and Cys322 prevent seeding of endogenous tau aggregates by exogenous seeds	Annadurai N, Malina L, Salmona M, Diomede L, Bastone A, Cagnotto A, Romeo M, Šrejber M, Berka K, Otyepka M, Hajdúch M, Das V.	FEBS J. 2022 Apr;289(7):1929-1949. doi: 10.1111/febs.16270. Epub 2021 Nov 18.	Annadurai N	FEBS J	2022	2021-11-07			10.1111/febs.16270
26480871	Re-engineering a neuroprotective, clinical drug as a procognitive agent with high in vivo potency and with GABAA potentiating activity for use in dementia	Luo J, Lee SH, VandeVrede L, Qin Z, Piyankarage S, Tavassoli E, Asghodom RT, Ben Aissa M, Fà M, Arancio O, Yue L, Pepperberg DR, Thatcher GR.	BMC Neurosci. 2015 Oct 19;16:67. doi: 10.1186/s12868-015-0208-9.	Luo J	BMC Neurosci	2015	2015-10-21	PMC4612403		10.1186/s12868-015-0208-9
26697495	Inhibition of ACE Retards Tau Hyperphosphorylation and Signs of Neuronal Degeneration in Aged Rats Subjected to Chronic Mild Stress	AbdAlla S, El Hakim A, Abdelbaset A, Elfaramawy Y, Quitterer U.	Biomed Res Int. 2015;2015:917156. doi: 10.1155/2015/917156. Epub 2015 Nov 30.	AbdAlla S	Biomed Res Int	2015	2015-12-24	PMC4677170		10.1155/2015/917156
25993608	Repositioning of Memantine as a Potential Novel Therapeutic Agent against Meningitic E. coli-Induced Pathogenicities through Disease-Associated Alpha7 Cholinergic Pathway and RNA Sequencing-Based Transcriptome Analysis of Host Inflammatory Responses	Yu JY, Zhang B, Peng L, Wu CH, Cao H, Zhong JF, Hoffman J, Huang SH.	PLoS One. 2015 May 19;10(5):e0121911. doi: 10.1371/journal.pone.0121911. eCollection 2015.	Yu JY	PLoS One	2015	2015-05-21	PMC4437645		10.1371/journal.pone.0121911
30117120	Curcumin-loaded self-nanomicellizing solid dispersion system: part II: in vivo safety and efficacy assessment against behavior deficit in Alzheimer disease	Parikh A, Kathawala K, Li J, Chen C, Shan Z, Cao X, Zhou XF, Garg S.	Drug Deliv Transl Res. 2018 Oct;8(5):1406-1420. doi: 10.1007/s13346-018-0570-0.	Parikh A	Drug Deliv Transl Res	2018	2018-08-18			10.1007/s13346-018-0570-0
34586649	Therapeutic potential of melatonin and melatonergic drugs on K18-hACE2 mice infected with SARS-CoV-2	Cecon E, Izabelle C, Poder SL, Real F, Zhu A, Tu L, Ghigna MR, Klonjkowski B, Bomsel M, Jockers R, Dam J.	J Pineal Res. 2022 Jan;72(1):e12772. doi: 10.1111/jpi.12772. Epub 2021 Oct 15.	Cecon E	J Pineal Res	2022	2021-09-29	PMC8646885		10.1111/jpi.12772
35394510	Comparative Risk of Alzheimer Disease and Related Dementia Among Medicare Beneficiaries With Rheumatoid Arthritis Treated With Targeted Disease-Modifying Antirheumatic Agents	Desai RJ, Varma VR, Gerhard T, Segal J, Mahesri M, Chin K, Horton DB, Kim SC, Schneeweiss S, Thambisetty M.	JAMA Netw Open. 2022 Apr 1;5(4):e226567. doi: 10.1001/jamanetworkopen.2022.6567.	Desai RJ	JAMA Netw Open	2022	2022-04-08	PMC8994126		10.1001/jamanetworkopen.2022.6567
27922743	Interview with Farid Khan, PhD		Assay Drug Dev Technol. 2016 Dec;14(10):551-553. doi: 10.1089/adt.2016.29051.fkh. Epub 2016 Dec 6.		Assay Drug Dev Technol	2016	2016-12-07			10.1089/adt.2016.29051.fkh
